# Supplementary material for: C 2 product formation in the CO 2 electroreduction on boron-doped graphene anchored copper clusters
Source: Royal Society of Chemistry journal article supplement (doi:10.1039/d2cp01316a), 2022-01-01
Supplement: d2cp01316a1.pdf [file d2cp01316a1.pdf]

# C<sub>2</sub> product formation in the CO<sub>2</sub> electroreduction on boron-doped graphene anchored copper clusters

## Supporting Information

Balázs Barhács<sup>a</sup>, Ewald Janssens<sup>b</sup>, Tibor Höltzl<sup>a,c,d</sup>

- a. Department of Inorganic and Analytical Chemistry, Budapest University of Technology and Economics, Szent Gellért tér 4, H-1111 Budapest, Hungary
- b. Quantum Solid-State Physics, KU Leuven, Celestijnenlaan 200D, BE-3001 Leuven, Belgium
- c. MTA-BME Computation Driven Research Group, Budapest University of Technology and Economics, Szent Gellért tér 4, H-1111 Budapest, Hungary
- d. Furukawa Electric Institute of Technology, Nanomaterials Science Group, Késmárk utca 28/A, H-1158 Budapest, Hungary

## Table of contents

|                                                                                          |     |
|------------------------------------------------------------------------------------------|-----|
| Table of contents.....                                                                   | 2   |
| 1. Basis set selection.....                                                              | 3   |
| 2. Selection of the DFT functional.....                                                  | 4   |
| 3. Boron-doping to immobilize copper clusters on graphene.....                           | 9   |
| 4. Quantification of the aromaticity.....                                                | 10  |
| 5. Stability of the investigated boron binding pattern.....                              | 11  |
| 6. The interpretation of the results with ALMO-EDA analysis.....                         | 13  |
| 7. Investigating various C <sub>1</sub> and C <sub>2</sub> intermediates.....            | 18  |
| a. C <sub>1</sub> intermediates.....                                                     | 18  |
| b. C <sub>2</sub> intermediates.....                                                     | 19  |
| 8. Reaction pathways resulting in C <sub>1</sub> products.....                           | 21  |
| 9. Reaction pathways resulting in C <sub>2</sub> products.....                           | 22  |
| 10. The effect of applied overpotential.....                                             | 22  |
| 11. The effect of adsorbed H <sub>2</sub> O species.....                                 | 23  |
| 12. The effect of vibrational contributions to the free energies.....                    | 24  |
| 13. Hydrogen evolution reaction (HER) on BDGCu <sub>4</sub> and BDGCu <sub>7</sub> ..... | 24  |
| 14. Proton-electron transfer reaction.....                                               | 25  |
| 15. Cartesian coordinates of all reaction intermediates in an aqueous solution.....      | 26  |
| a. Cu <sub>4</sub> cluster – C <sub>1</sub> pathway.....                                 | 26  |
| b. Cu <sub>4</sub> cluster – C <sub>2</sub> pathway.....                                 | 45  |
| c. Cu <sub>7</sub> cluster – C <sub>1</sub> pathway.....                                 | 63  |
| d. Cu <sub>7</sub> cluster – C <sub>2</sub> pathway.....                                 | 80  |
| 16. References.....                                                                      | 100 |

## 1. Basis set selection

We investigated the effect of the basis size using the CAM-B3LYP functional. We tested the segmentation of the basis sets (DZ, TZ, QZ), and the effect of polarization and diffuse functions. We used the Karlsruhe basis sets (def2-SVP, def2-SVPD, def2-TZVP, def2-TZVPPD, def2-QZVPP, def2-QZVPPD). The computed interaction energies in kJ/mol alongside with the pictures of most stable structures for each basis set are shown in Figure S1.

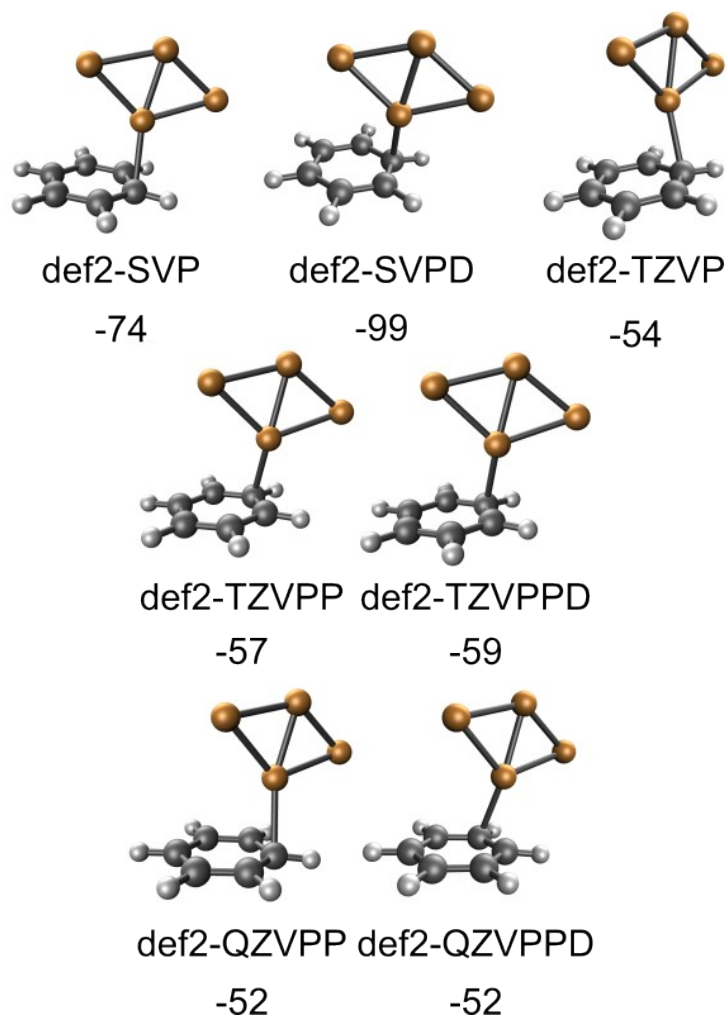

**Figure S1.** Geometries and interaction energies of  $\text{Cu}_4$ -benzene adducts with different basis sets. The interaction energies are shown in kJ/mol

It is visible that the interaction energy saturates at around -50 kJ/mol using a triple zeta basis set and further increase of the basis set size does not improve the results. A counterpoise correction was also performed to check the BSSE (Basis Set Superposition Error). The counterpoise-corrected interaction energies are shown in Table S1 Compared to the values in Figure S1, it is visible that starting from def2-TZVP, BSSE is around only a few kJ/mol. These indicate that the def2-TZVP basis set is sufficiently accurate.

**Table S1.** Counterpoise corrected interaction energies with different basis sets

|             | $E_{\text{interaction}}$<br>(kJ/mol) |
|-------------|--------------------------------------|
| def2-SVP    | -37                                  |
| def2-SVPD   | -42                                  |
| def2-TZVP   | -50                                  |
| def2-TZVPP  | -51                                  |
| def2-TZVPPD | -51                                  |
| def2-QZVPP  | -51                                  |
| def2-QZVPPD | -                                    |

## 2. Selection of the DFT functional

We also investigated the effect of range-separated functionals, and additional empirical dispersion correction. All functionals were tested against benchmark computations with both CCSD(T) and MP2-based wavefunction methods with def2-TZVPPD (and for MP2 based methods also def2-QZVPPD) basis sets, on both CAM-B3LYP/def2-TZVP and RI-MP2/def2-TZVPPD geometries. The results are available in Table S2 and Figure S2.

**Table S2.** The results of method testing. Our final choice is shown with green background

|                    | $E_{\text{interaction}}$ (kJ/mol) |
|--------------------|-----------------------------------|
| CAM-B3LYP          | -54                               |
| $\omega$ B97X-D    | -76                               |
| M11-L              | -59                               |
| PBE - D2           | -98                               |
| PBE - D3           | -96                               |
| BLYP - D3          | -82                               |
| RI-MP2 (TZ)        | -122                              |
| MP2 (sp) TZ        | -121                              |
| RI-MP2 (sp) QZ     | -115                              |
| SOS-MP2 (sp) QZ    | -64                               |
| MOS-MP2 (sp) QZ    | On an RI-MP2 TZ geometry          |
| SCS-MP2 (sp) QZ    | -81                               |
| SCS-MI-MP2 (sp) QZ | -81                               |
| CCSD(T) (sp) TZ    | -118                              |
| CCSD(T) (sp) TZ 2  | -124                              |
| RI-MP2 (sp) TZ 2   | On a CAM-B3LYP geometry           |
| CAM-B3LYP-D3 (sp)  | -75                               |

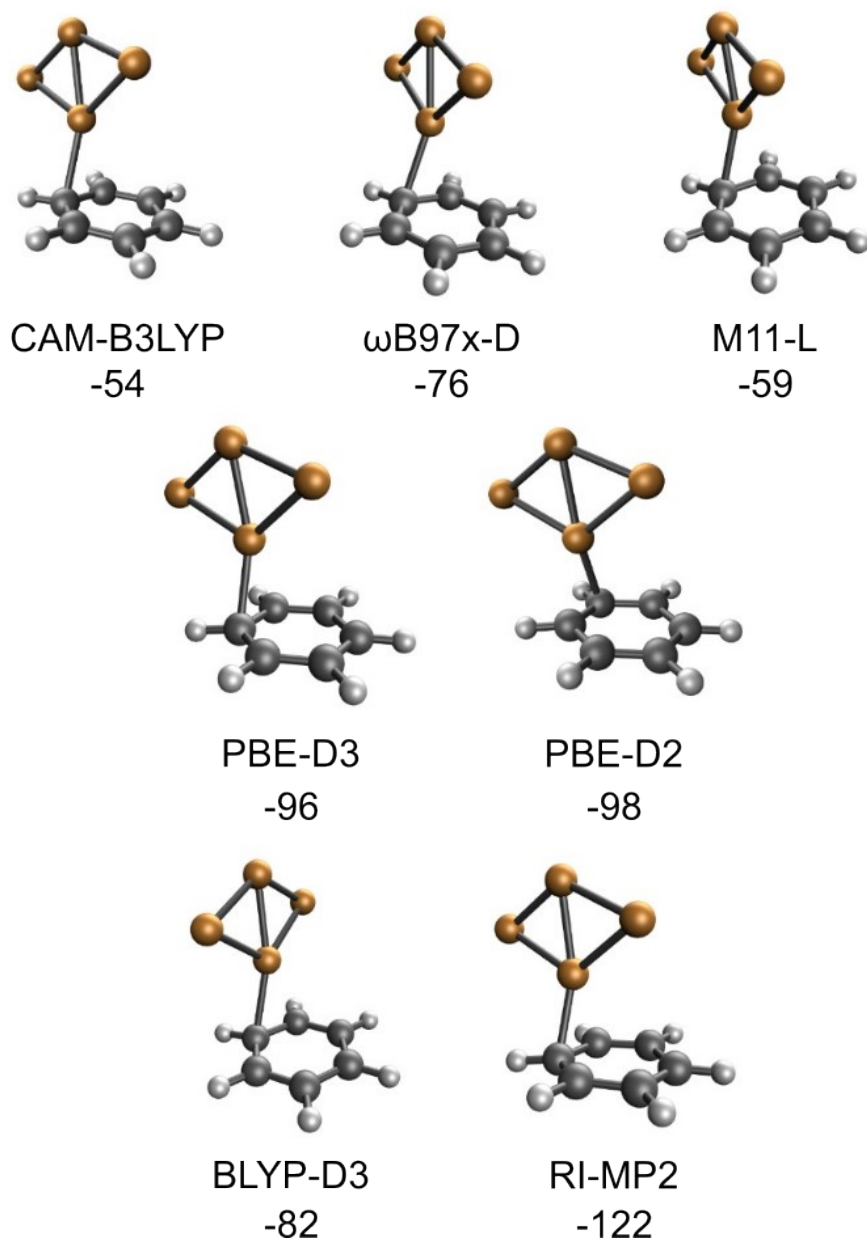

**Figure S2.** Geometries and interaction energies of Cu<sub>4</sub>-benzene adducts with different methods. The interaction energies are shown in kJ/mol

It is visible, that the interaction energies using PBE with additional dispersion correction are closest to those of the CCSD(T) benchmark computations. The effect of the doping was investigated using pyridine (Figure S3). The reference is a CCSD(T) single-point energy on CAM-B3LYP geometry, that is -108 kJ/mol.

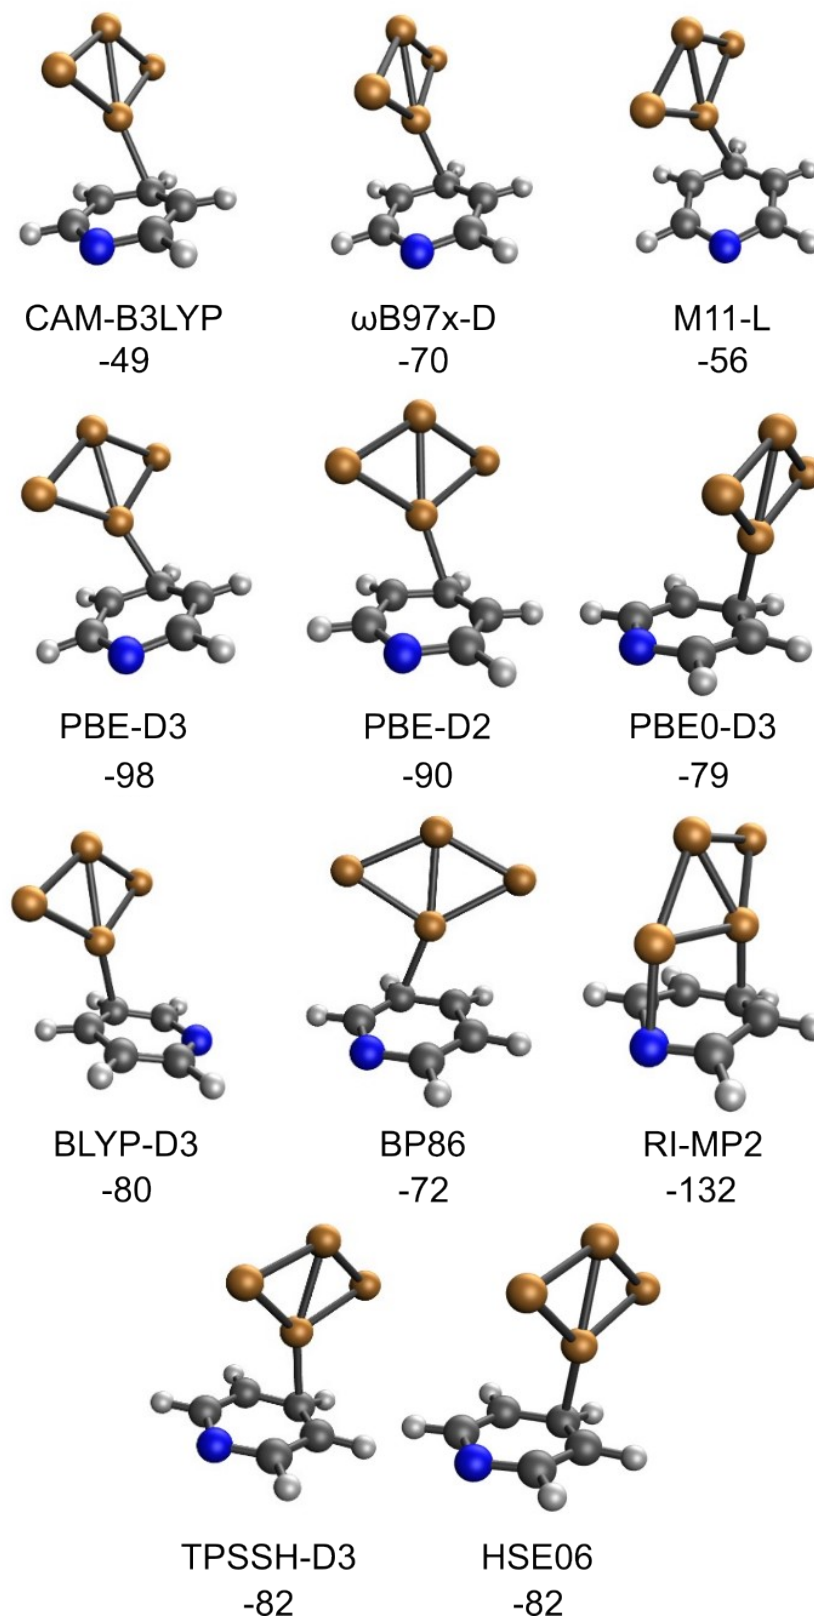

**Figure S3.** Geometries and interaction energies of Cu<sub>4</sub>-pyridine adducts with different methods. The interaction energies are shown in kJ/mol

It is well visible that again, PBE with empirical dispersion correction resulted the closest interaction energy to CCSD(T). We performed single point computations for borabenzene on

a CAM-B3LYP geometry to see if there is any difference but again, PBE with dispersion correction was found to be an appropriate choice. We can clearly see that for all 3 adducts of  $\text{Cu}_4$ , that D2 and D3 have almost the same results. We finally selected **PBE-D2/def2-TZVP** level of theory for the computations.

**Table S3.** The results of method testing for the borabenzene adduct of  $\text{Cu}_4$

|                              | $E_{\text{interaction}}$ (kJ/mol) |
|------------------------------|-----------------------------------|
| <b>CAM-B3LYP</b>             | -246                              |
| <b>CAM-B3LYP-D3 (sp)</b>     | -285                              |
| <b>PBE -D2 (sp) (TZVP)</b>   | -302                              |
| <b>PBE -D3 (sp) (TZVP)</b>   | -304                              |
| <b>PBE -D3 (sp) (TZVPPD)</b> | -310                              |
| <b>RI-MP2 (sp)</b>           | -383                              |
| <b>CCSD(T) (sp)</b>          | -355                              |

We also tested different methods for the CO and  $\text{CH}_3\text{OH}$  adducts of  $\text{Cu}_4$ , investigating all the different sites of both planar (neutral) and tetrahedral (dicationic) clusters. The results are shown in Figure S4, Figure S5 and Figure S6. It is well visible, that PBE-D2/def2-TZVP is sufficiently accurate.

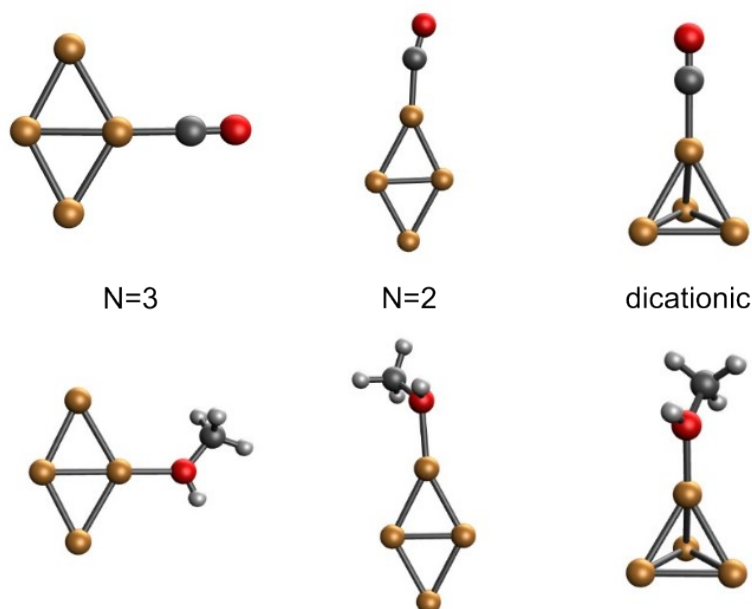

**Figure S4.** The CO and  $\text{CH}_3\text{OH}$  adducts of planar, neutral and dicationic tetrahedral  $\text{Cu}_4$  clusters. N refers to the coordination number of the Cu atom that binds to the reactant molecules

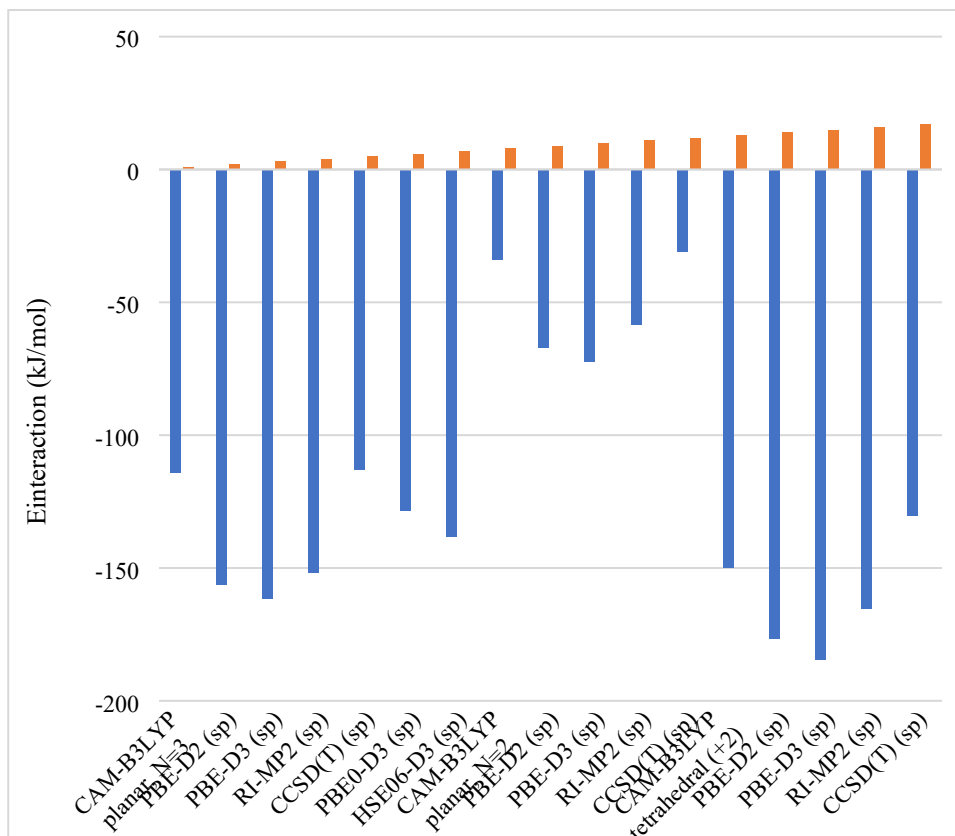

**Figure S5.** The CO adducts of Cu<sub>4</sub> with different methods.

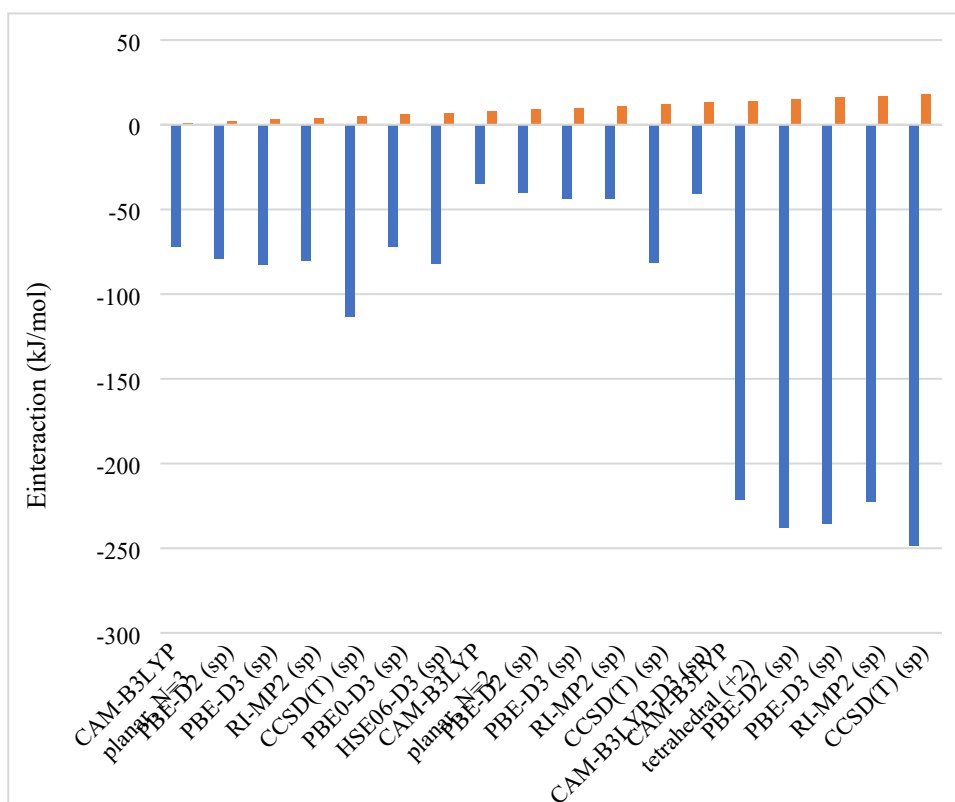

**Figure S6.** The CH<sub>3</sub>OH adducts of Cu<sub>4</sub> with different methods



### 3. Boron-doping to immobilize copper clusters on graphene

We investigated the interaction of  $\text{Cu}_4$  clusters with small aromatic hydrocarbons as a model for the doped graphene. The interaction between aromatic hydrocarbons and  $\text{Cu}_4$  clusters can be significantly increased with boron doping: the interaction energy of  $\text{Cu}_4$  clusters with borabenzene is much larger than with benzene, and the geometry of the adduct also changes significantly. This shows that boron-doping is a promising method to immobilize copper clusters on graphene.

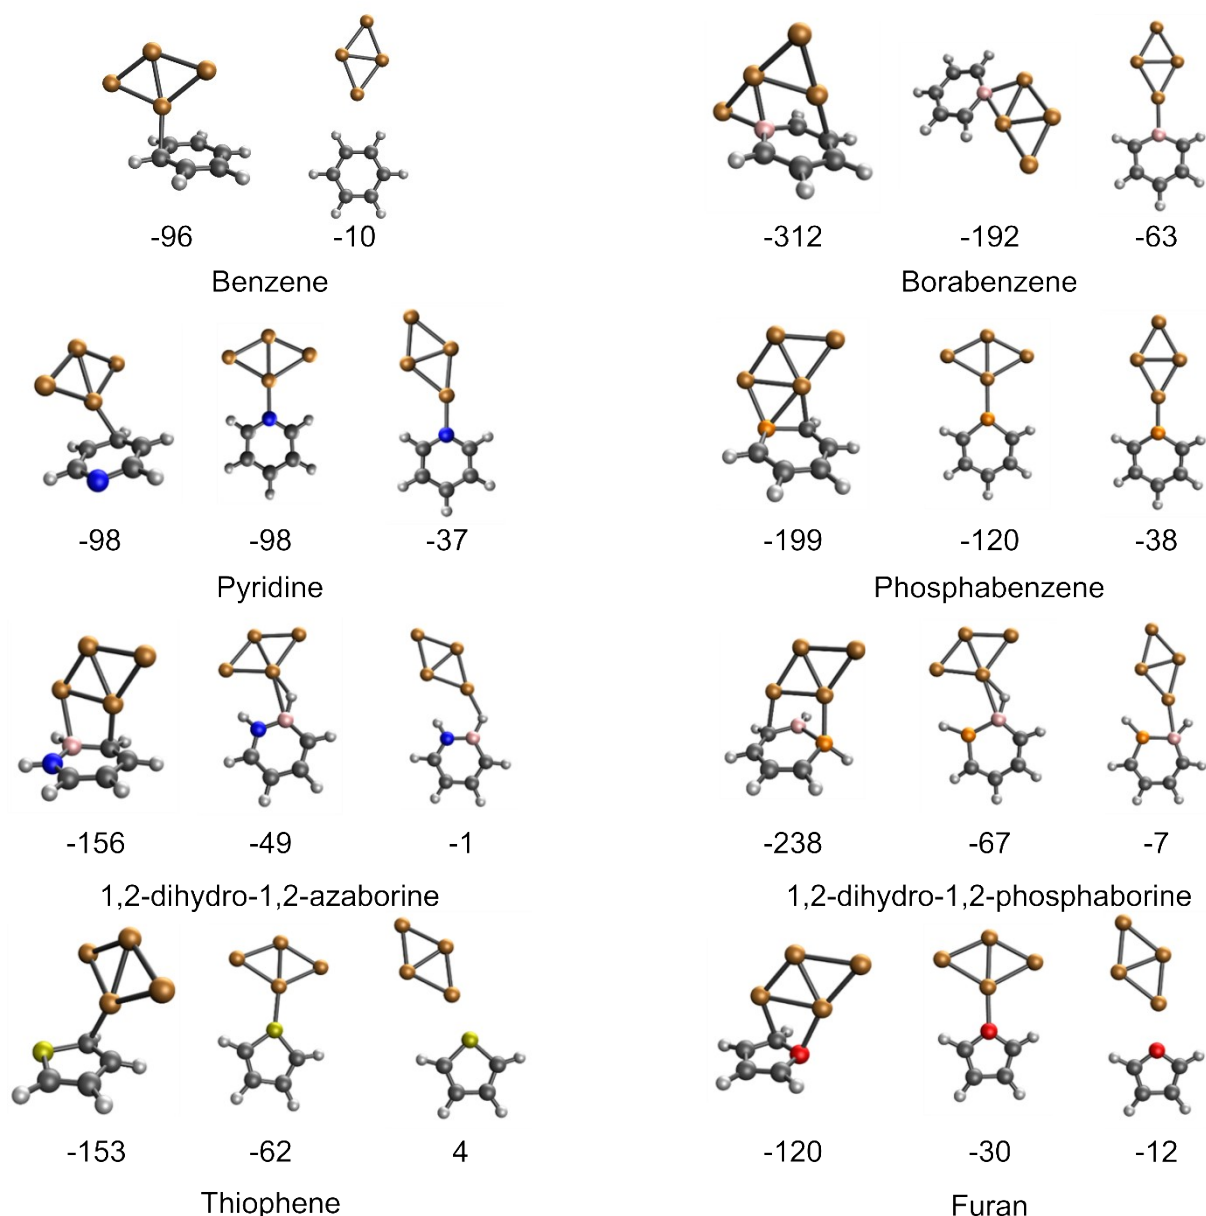

**Figure S7.** The effect of dopant atoms to the interaction energy and structure. The interaction energies are shown in kJ/mol. For benzene, only two binding modes were observed. (PBE-D3/def2-TZVP)

It was shown in a previous work,<sup>i</sup> that a single Cu atom bound to boron doped graphene in the same dopant pattern as we use, is thermodynamically less stable than the bulk copper metal. This raises questions on the solvent phase synthesizability. Here we propose a different route. According to the above definition, metal clusters are not expected to be stable by their nature, however they can be synthesized<sup>ii-iv</sup> (including Cu clusters<sup>v</sup>) in the gas phase and can be deposited on appropriate support.<sup>iii,iv</sup> The strong interaction with the boron atoms stabilizes the clusters and the large binding energies clearly show that they are immobilized and thus their aggregation is hindered. In line, according to the above definition<sup>i</sup>, Au atom is also thermodynamically less stable on defective graphene compared to the bulk metal, but few-atom Au clusters were successfully deposited on graphene several times.<sup>iii,iv</sup> This shows the synthetic potential of our proposed catalyst system.

#### 4. Quantification of the aromaticity

The NICS (0) values of -20.0 ppm (when the ghost atom is placed in the centre of the ring) of our nanoflake model molecule compared to -7.7 ppm of that of the benzene indicates that our model system can be aromatic. However, a relatively large electron density in the center of the ring can lead to low NICS (0) values. The electron density is visualized on Figure S8. It is visible, that in the central trigonal “boron” ring, the electron density is significantly higher than in the centre of other “benzene-like” rings (in the latter, the electron density is non-zero, we only set a higher isosurface value, so that the differences could be easily seen). This excess electron density in the center of the ring is due to the boron-boron interactions, as it is indicated by the Wiberg indices.

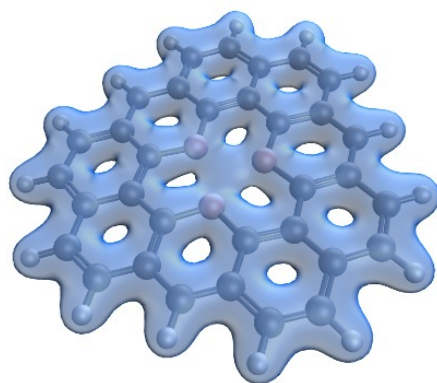

**Figure S8.** The electron density of the BDG nanoflake

Thus, we also computed the NICS (1) value of the BDG nanoflake, when the ghost atom is placed not in the centre of the ring, but exactly 1 Å higher in z direction. The purpose of

these calculations is that the high electron density of the central ring does not affect the NICS value. For benzene, we got a NICS (1) value of -9,8 ppm, which is lower than the NICS (0) value. For the BDG nanoflake model, we got -8,9 ppm, which is significantly higher than the NICS (0). Here the effect of the high electron density is seen: the absolute value of NICS decreases, but still, -8,9 ppm means that our model molecule is still aromatic.

## 5. Stability of the investigated boron binding pattern

While the aromaticity suggests the investigated boron doped nanoflake is stable, we also estimated its heat of formation and compared it with that of several reference compounds. The heat of formation was estimated by referencing to the hypothetical formation energy of the different compounds from methane and diborane and also to the experimental heat of formation of these two small molecules.<sup>vi</sup> The results are available in Table S4 and Figure S9.

**Table S4.** Gas phase heat of formation (at 298K) of BDG, along with several reference compounds

| <b>Formula</b>                                 | <b>Heat of formation<br/>(kJ/mol)</b> | <b>Remark</b>                                                            |
|------------------------------------------------|---------------------------------------|--------------------------------------------------------------------------|
| C <sub>6</sub> H <sub>6</sub>                  | 83.2                                  | Benzene <sup>vii</sup>                                                   |
| C <sub>10</sub> H <sub>8</sub>                 | 150.6                                 | Naphthalene <sup>vii</sup>                                               |
| C <sub>14</sub> H <sub>10</sub>                | 202.2                                 | Phenantrene <sup>vii</sup>                                               |
| C <sub>24</sub> H <sub>12</sub>                | 279.7                                 | Coronene <sup>vii</sup>                                                  |
| C <sub>12</sub> BH <sub>9</sub>                | 349 <sup>(a)</sup>                    | Single trivalent boron doped PAH model <sup>(b)</sup>                    |
| C <sub>33</sub> B <sub>3</sub> H <sub>15</sub> | 937 <sup>(a)</sup>                    | BDG                                                                      |
| C <sub>48</sub> B <sub>2</sub> H <sub>22</sub> | 934 <sup>(a)</sup>                    | Core of the synthesized boron doped PAH in reference <sup>viii,(b)</sup> |
| B <sub>36</sub>                                | 2604 <sup>(a)</sup>                   | Borophene nanoflake <sup>ix,(b)</sup>                                    |
| C <sub>60</sub>                                | 2319.7                                | Buckminsterfullerene <sup>vii</sup>                                      |
| C <sub>70</sub>                                | 2501                                  | Fullerene <sup>vii</sup>                                                 |

<sup>(a)</sup> Computed values in this paper. Method: PBE/def2-TZVP

<sup>(b)</sup> Frequency computation was performed using the LANL2DZ basis.

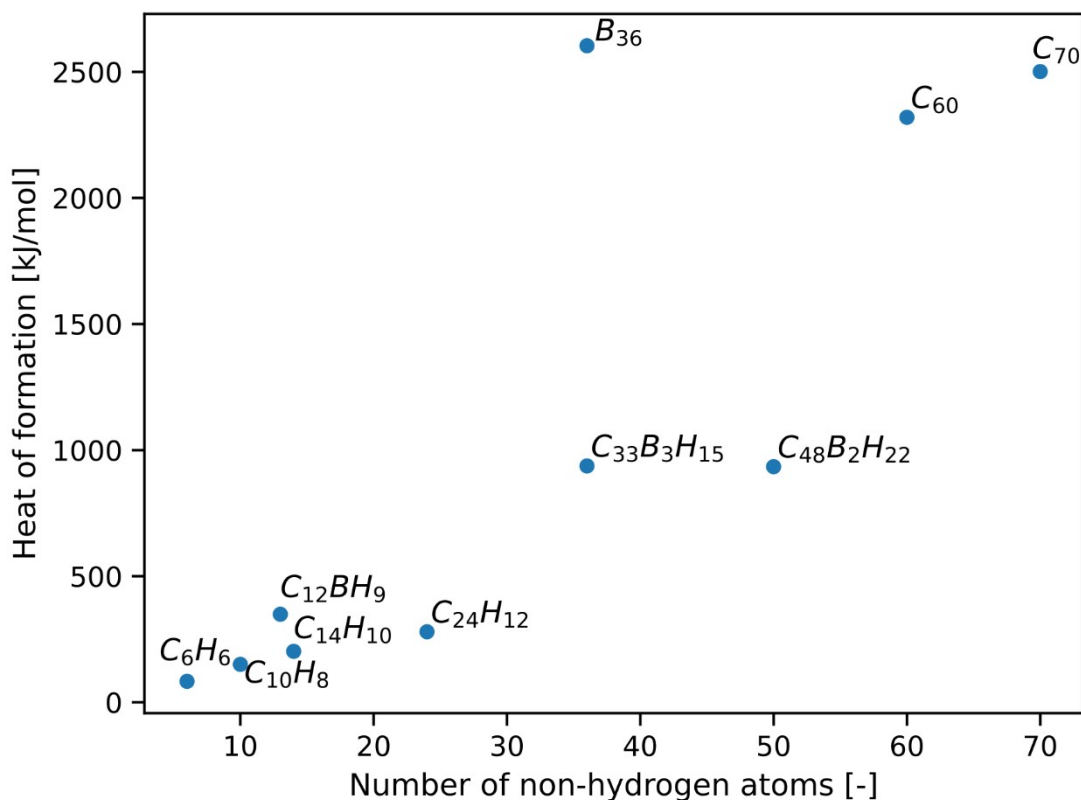

**Figure S9.** Gas phase heat of formation (at 298K) of BDG ( $C_{33}B_3H_{15}$ ), along with several reference compounds.  $C_{12}BH_9$  represents a single, trivalent boron doped small nanoflake, what models the binding mode of the previously synthesized boron doped graphene layer using CVD.<sup>x</sup>  $C_{48}B_2H_{22}$  is a PAH doped by two, trivalent boron atoms, which was synthesized using appropriate bulky protecting groups.<sup>viii</sup>  $B_{36}$  is a borophene nanoflake, whose anion was first observed in a low pressure cell,<sup>ix</sup> while borophene layer was synthesized later with CVD using well selected substrate materials.<sup>xi-xiv</sup>

These results show that the heat of formation of the BDG nanoflake is in the range of reference compounds of similar size. While polycyclic aromatic hydrocarbons or fullerenes typically have positive heat of formation, these are well known, stable compounds. Thus, based on the heat of formations of BDG and several reference compounds, we expect that systems containing boron in this binding mode can be synthesized using organic or organometallic synthesis methods with appropriate protecting groups or using CVD with well-selected precursors and substrate.

## 6. The interpretation of the results with ALMO-EDA analysis

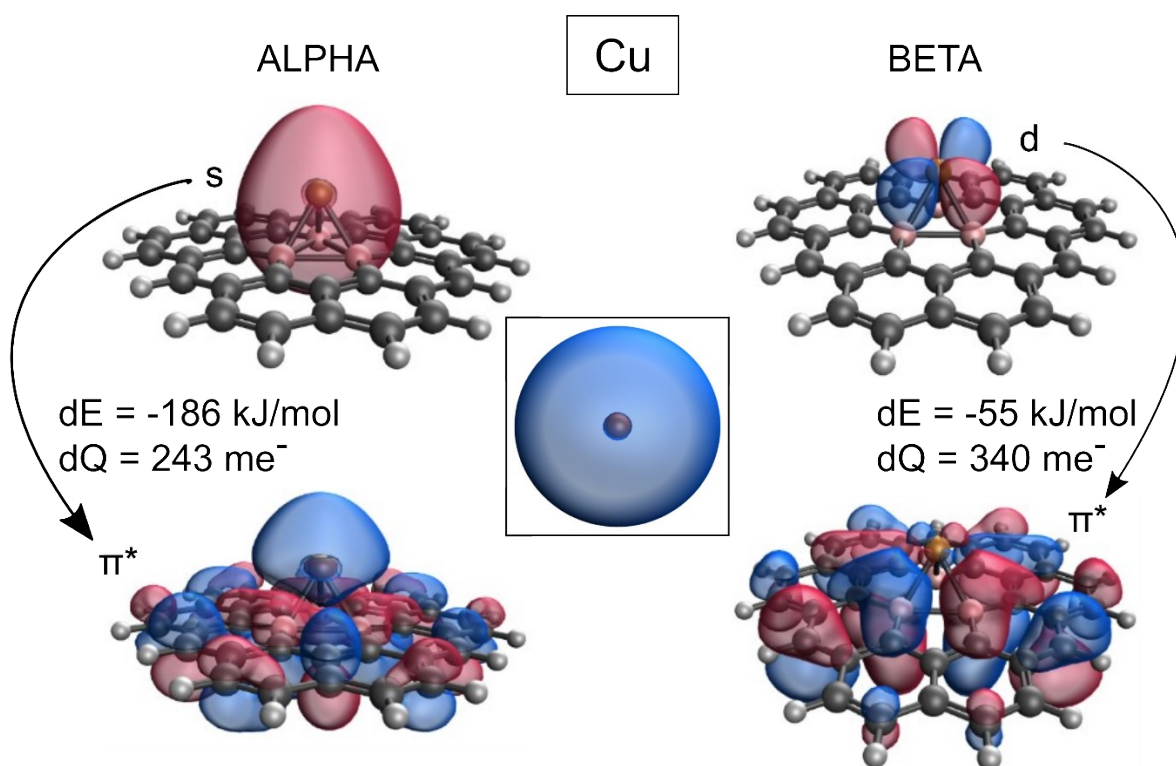

Figure S10. The most relevant COVP pairs of the BDGCu system.

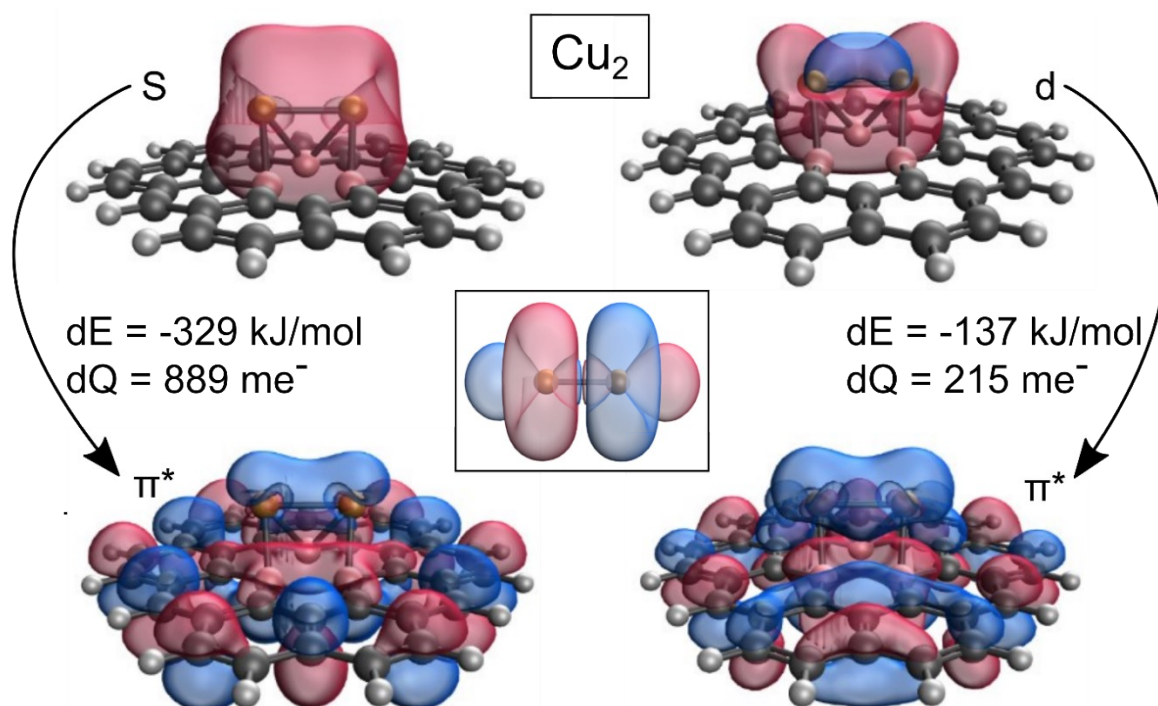

Figure S11. The most relevant COVP pairs of the BDGCu<sub>2</sub> system



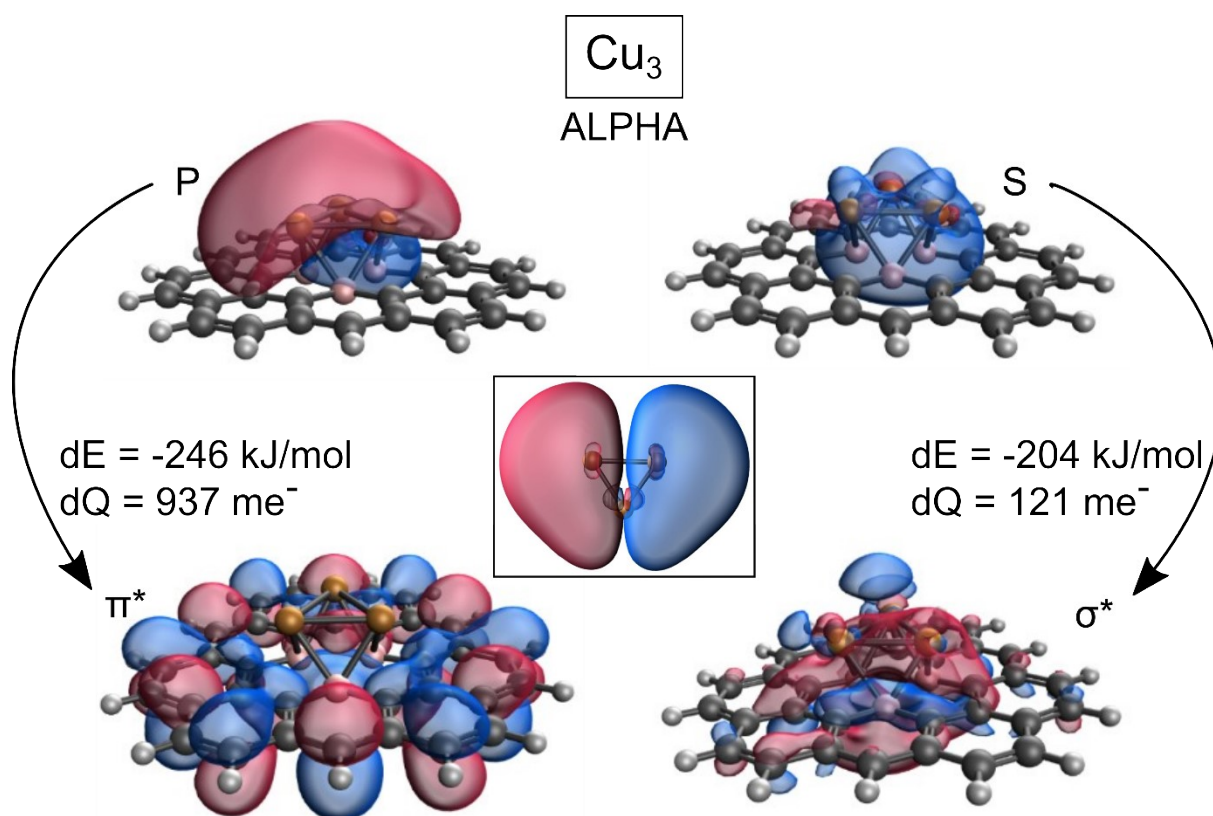

**Figure S12.** The most relevant COVP pairs of the BDGCu<sub>3</sub> system

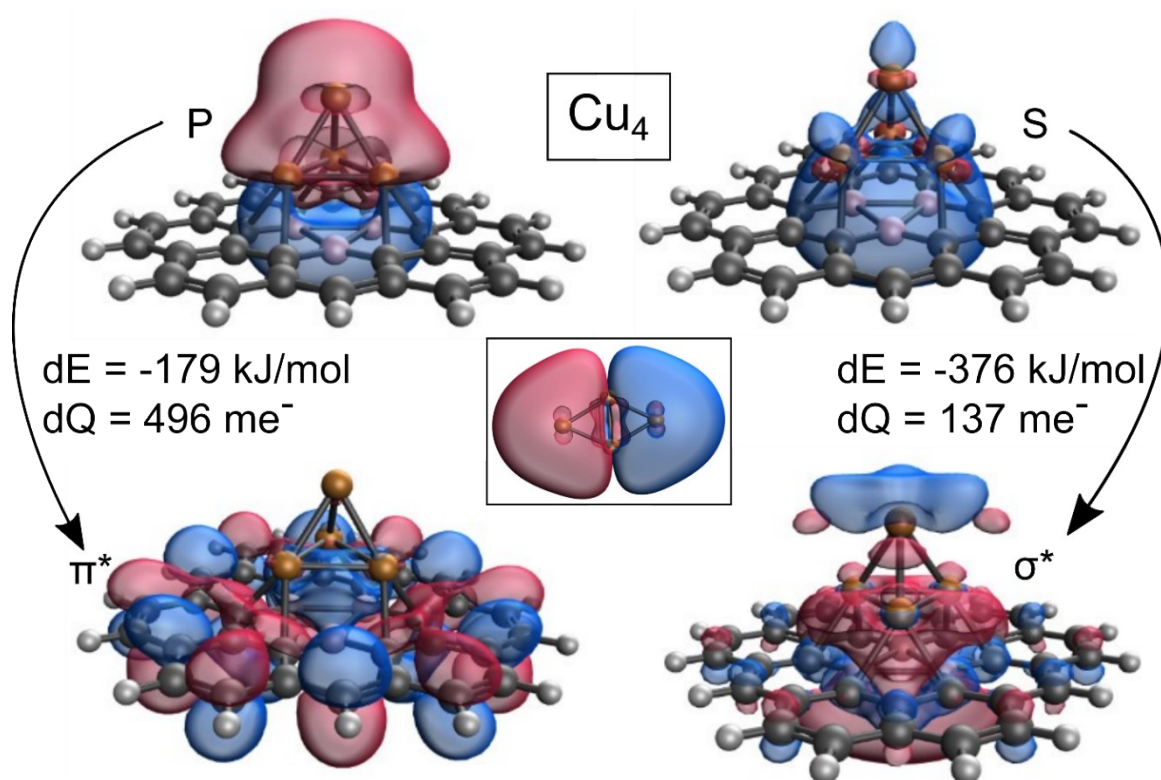

**Figure S13.** The most relevant COVP pairs of the BDGCu<sub>4</sub> system

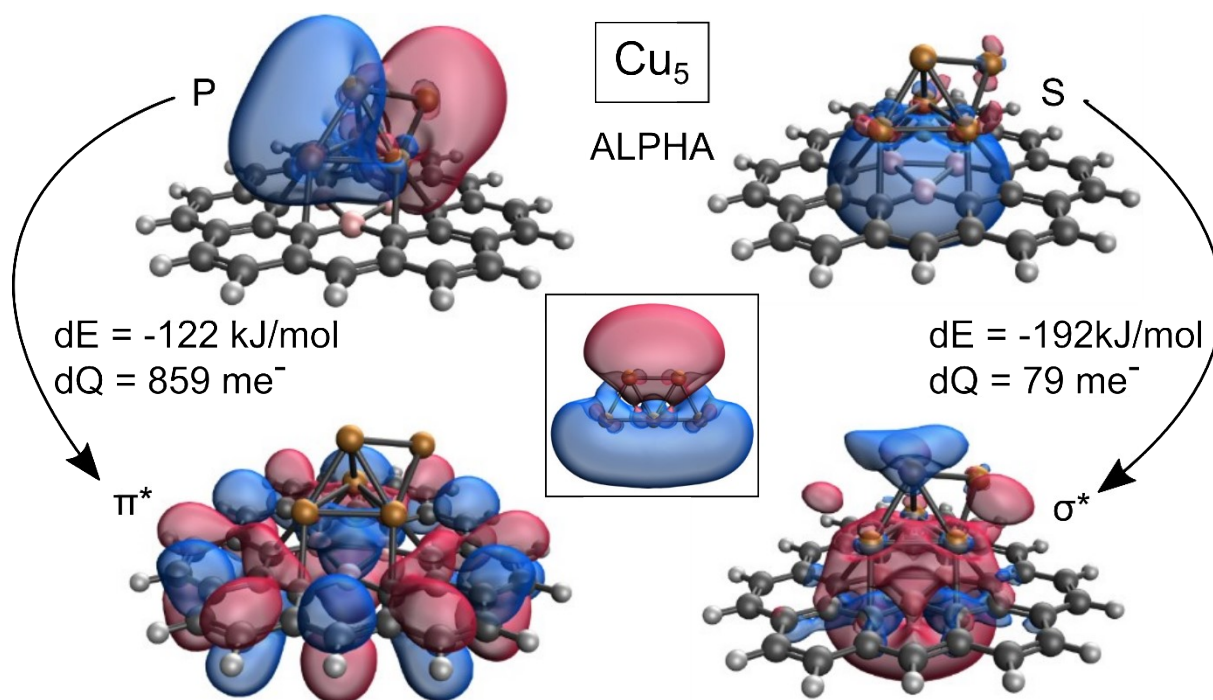

**Figure S14.** The most relevant COVP pairs of the BDGCu<sub>5</sub> system

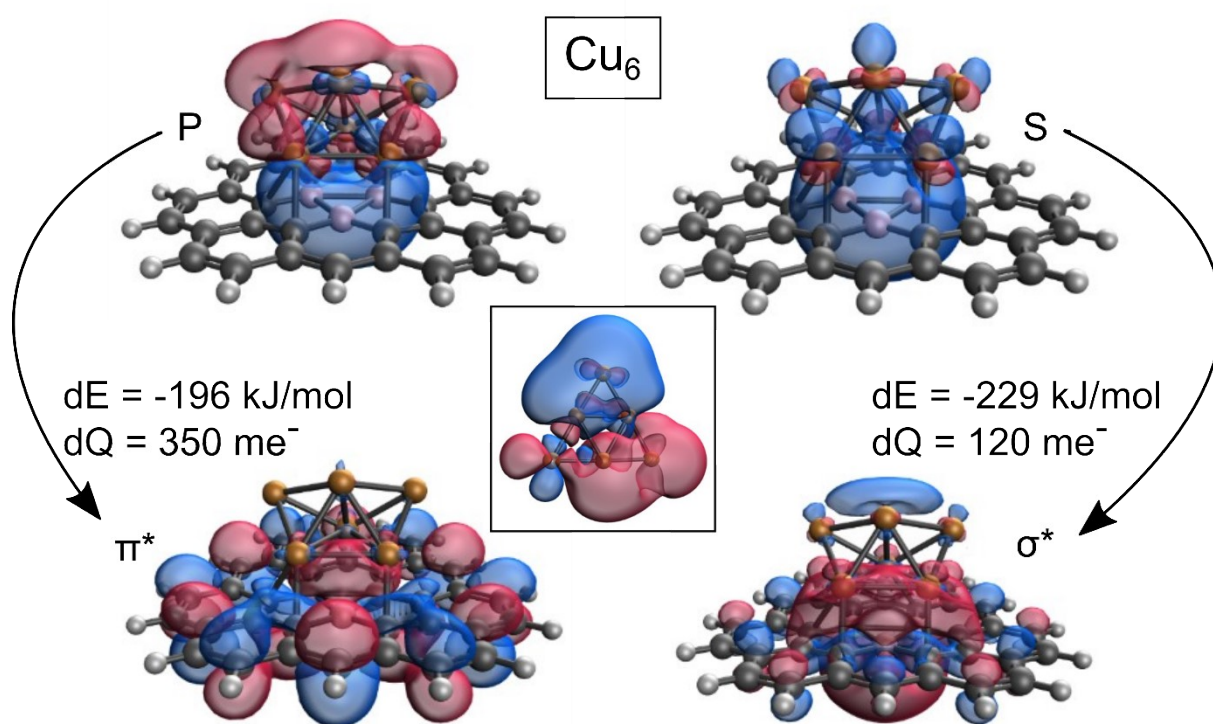

**Figure S15.** The most relevant COVP pairs of the BDGCu<sub>6</sub> system

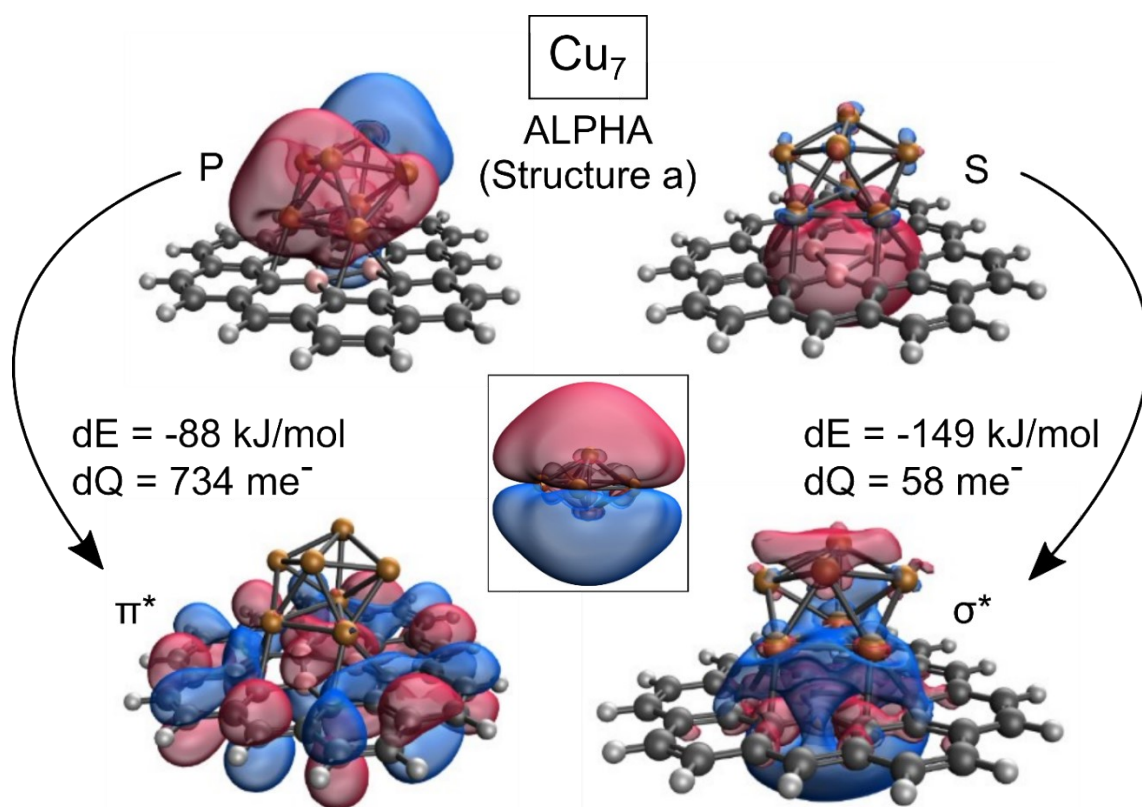

**Figure S16.** The most relevant COVP pairs of the BDGCu<sub>7</sub> system (less stable structure)

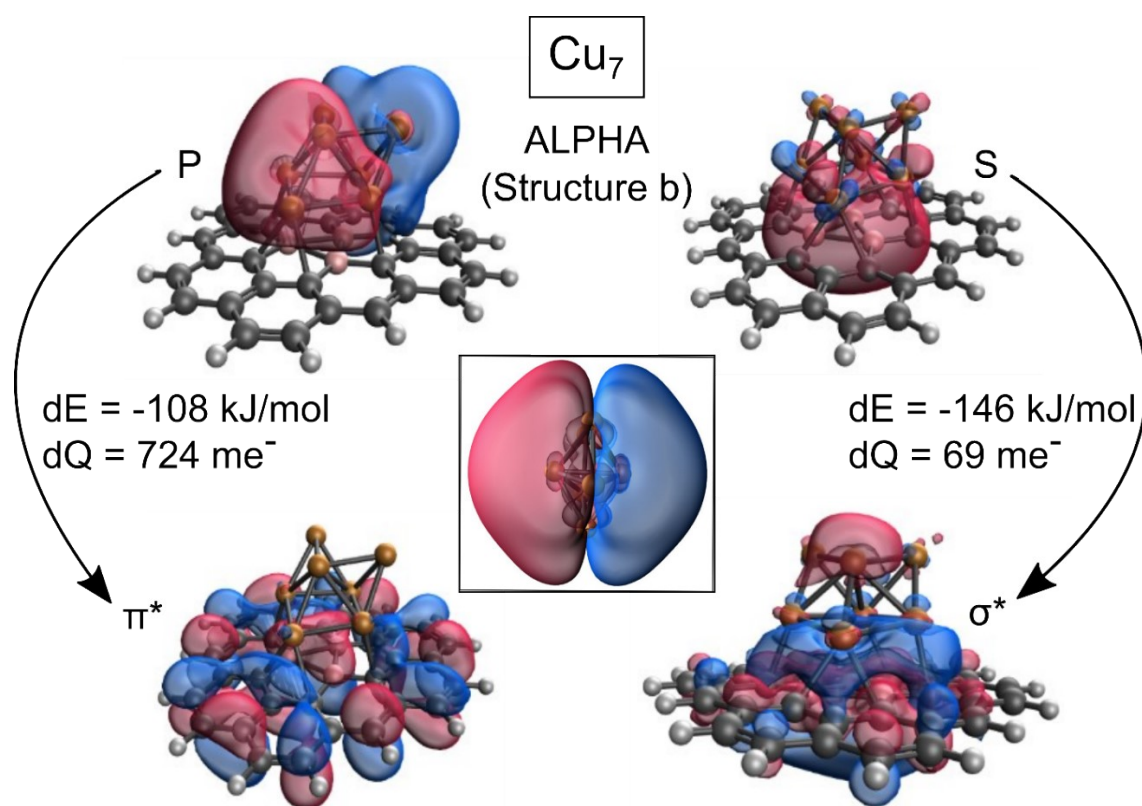

**Figure S17.** The most relevant COVP pairs of the BDGCu<sub>7</sub> system (more stable structure)



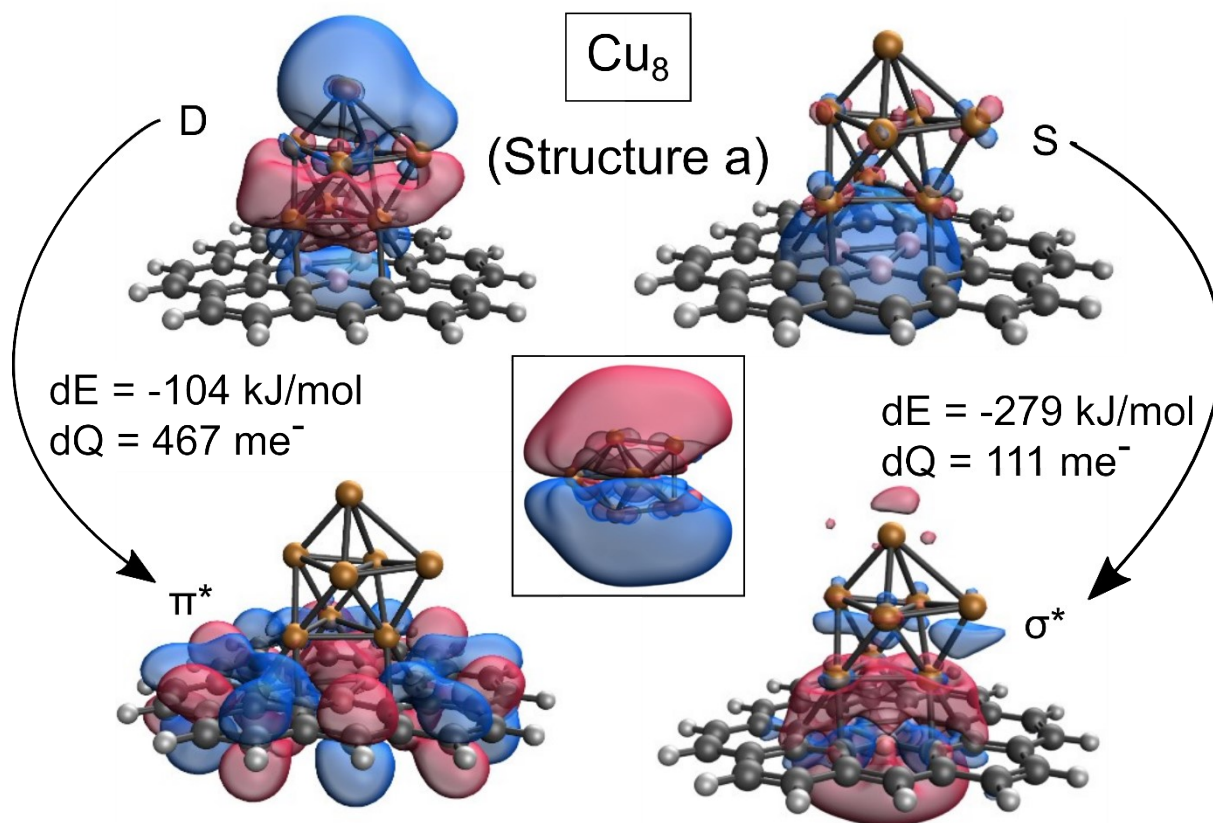

**Figure S18.** The most relevant COVP pairs of the BDGCu<sub>8</sub> system (less stable structure)

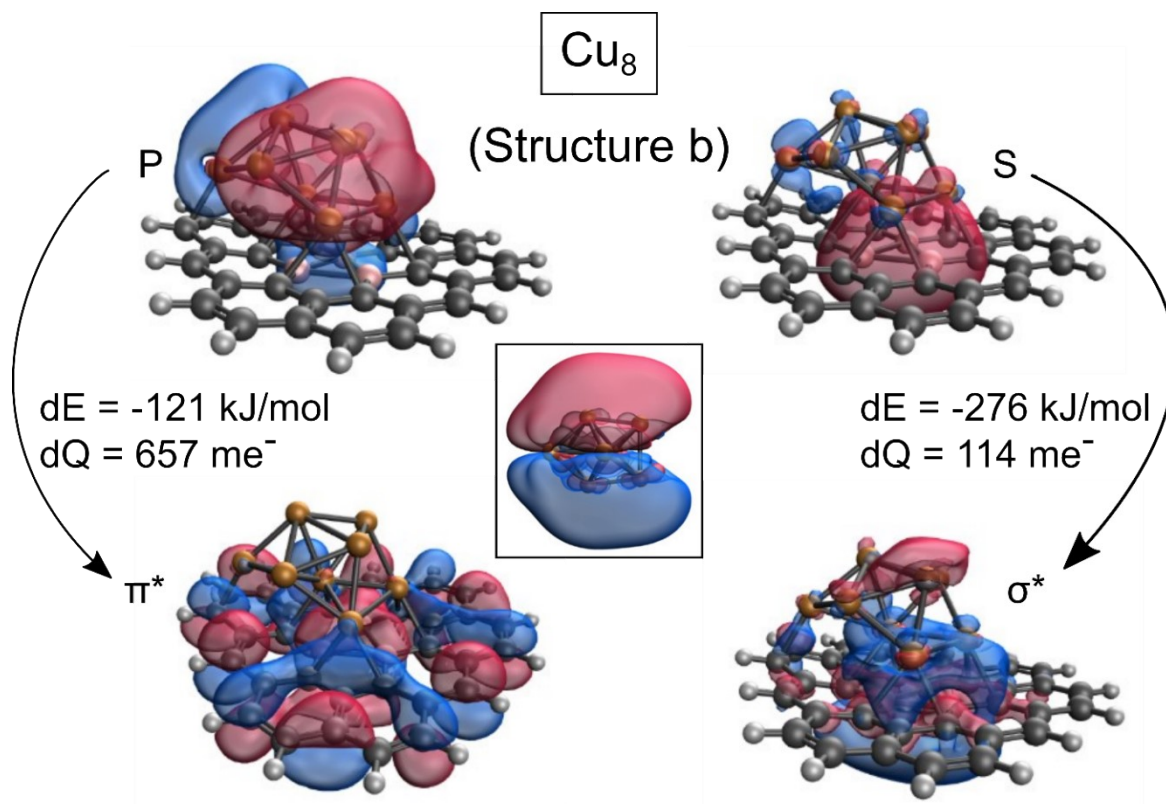

**Figure S19.** The most relevant COVP pairs of the BDGCu<sub>8</sub> system (more stable structure)

## 7. Investigating various C<sub>1</sub> and C<sub>2</sub> intermediates

### a. C<sub>1</sub> intermediates

All possible and relevant intermediates were investigated for BDG bound Cu<sub>4</sub> clusters. Only the most stable (therefore most promising) intermediates were computed in an aqueous solution for Cu<sub>4</sub> and later, on Cu<sub>7</sub> in gas phase and aqueous solution (marked with green background, Table S4).

**Table S5.** Investigation of various C<sub>1</sub> intermediates. The promising (most stable) intermediates are marked with green, others are marked with red background

| <b>METHANOL</b>                                         | <b>Reaction energy (kJ/mol)</b> |
|---------------------------------------------------------|---------------------------------|
| * + CO <sub>2</sub> + 4H <sub>2</sub>                   | 0                               |
| *CO <sub>2</sub>                                        | -95                             |
| H* + CO <sub>2</sub>                                    | -70                             |
| *HCOO                                                   | -196                            |
| *HCOOH                                                  | -137                            |
| *H <sub>2</sub> COOH                                    | -165                            |
| *H <sub>2</sub> COHOH                                   | -195                            |
| *OH + *CH <sub>2</sub> O                                | -123                            |
| *OH + *CH <sub>3</sub> O                                | -287                            |
| *H <sub>2</sub> O + *CH <sub>3</sub> O                  | -273                            |
| *H <sub>2</sub> O + *CH <sub>3</sub> OH                 | -303                            |
| H <sub>2</sub> O + *CH <sub>3</sub> O                   | -151                            |
| H <sub>2</sub> O + *CH <sub>3</sub> OH                  | -223                            |
| H <sub>2</sub> O + * + CH <sub>3</sub> OH               | -80                             |
| *H <sub>2</sub> O + CH <sub>3</sub> OH                  | -219                            |
| <b>CARBON MONOXIDE</b>                                  | <b>Reaction energy (kJ/mol)</b> |
| *COH                                                    | -60                             |
| *CO + *OH                                               | -139                            |
| CO + *OH                                                | 38                              |
| CO + *H <sub>2</sub> O                                  | -49                             |
| *CO + *H <sub>2</sub> O                                 | -165                            |
| *CO + H <sub>2</sub> O                                  | -81                             |
| CO + * + H <sub>2</sub> O                               | 90                              |
| *COHOH                                                  | -44                             |
| *COH + *OH                                              | 49                              |
| <b>METHANE</b>                                          | <b>Reaction energy (kJ/mol)</b> |
| H <sub>2</sub> O + *O + *CH <sub>3</sub>                | -223                            |
| H <sub>2</sub> O + *O + CH <sub>4</sub>                 | -149                            |
| H <sub>2</sub> O + *OH + *CH <sub>3</sub>               | -332                            |
| H <sub>2</sub> O + *H <sub>2</sub> O + *CH <sub>3</sub> | -272                            |
| H <sub>2</sub> O + *OH + CH <sub>4</sub>                | -247                            |
| 2H <sub>2</sub> O + *CH <sub>3</sub>                    | -200                            |
| H <sub>2</sub> O + *H <sub>2</sub> O + *CH <sub>4</sub> | -359                            |
| *H <sub>2</sub> O + *OH + *CH <sub>4</sub>              | -399                            |
| *H <sub>2</sub> O + *OH + CH <sub>4</sub>               | -390                            |
| *H <sub>2</sub> O + *H <sub>2</sub> O + CH <sub>4</sub> | -423                            |

|                                               |                                 |
|-----------------------------------------------|---------------------------------|
| $H_2O + *H_2O + CH_4$                         | -334                            |
| $* + 2H_2O + CH_4$                            | -195                            |
| <b>FORMIC ACID</b>                            | <b>Reaction energy (kJ/mol)</b> |
| $*+HCOOH$                                     | -13                             |
| <b>FORMALDEHYDE</b>                           | <b>Reaction energy (kJ/mol)</b> |
| $*H_2O + *CH_2O$                              | -176                            |
| $*H_2O + CH_2O$                               | -101                            |
| $H_2O + *CH_2O$                               | -95                             |
| $* + H_2O + CH_2O$                            | 38                              |
| <b>METHANE ALTERNATIVE PATHWAY</b>            | <b>Reaction energy (kJ/mol)</b> |
| $*H_2O + *COH$                                | 73                              |
| <b>METHANE + METHANOL ALTERNATIVE PATHWAY</b> | <b>Reaction energy (kJ/mol)</b> |
| $*H_2O + *CHO$                                | -112                            |
| $*H_2O + *CH_2O$                              | -171                            |

Usually, COH species do not form in the gas phase however, the presence of water can promote COH formation instead of CHO.<sup>xv</sup> Therefore, we investigated COH formation in a solvate model as well (Table S5). but still, the reaction through COH on small Cu clusters does not seem to be the most favoured pathway.

**Table S6.** The reaction energy of COH formation in an aqueous solution

| <b>METHANE ALTERNATIVE PATHWAY</b> | <b>Reaction Gibbs free energy (kJ/mol)</b> |
|------------------------------------|--------------------------------------------|
| $*H_2O + *COH$                     | 21                                         |

### b. C<sub>2</sub> intermediates

Here, we divided the reaction pathway into two parts. The first part is the intersection from the CO pathway, and the adsorption of the second CO<sub>2</sub> molecule, until the formation of 2 CO molecules. The second is the formation of OCCOH, and its further reduction until the desired products. For the second part, we made pre-computations (Table S6) for BDGCu<sub>7</sub>. For the first part of the C<sub>2</sub> pathway, we assumed that the second CO<sub>2</sub> is reduced with the same mechanism as the first one (through \*COOH). The most promising reaction paths were also computed for BDGCu<sub>4</sub>.

**Table S7.** Our pre-computations for the C<sub>2</sub> pathway. The promising (most stable) intermediates are marked with green, others are marked with red background.

| <b>Common pathway</b> | <b>Reaction energy (kJ/mol)</b> |
|-----------------------|---------------------------------|
| $*CO + *CO + 2H_2O$   | -40                             |
| $*COCO- + 2H_2O$      | -216                            |
| $*COCO + 2H_2O$       | 95                              |
| $*CO + *COH + 2H_2O$  | 40                              |
| $*COCOH + 2H_2O$      | -15                             |
| $*COHCOH + 2H_2O$     | 105                             |
| $*CCO + 3H_2O$        | -45                             |

|                                                                                              |                                 |
|----------------------------------------------------------------------------------------------|---------------------------------|
| *CHCO + 3H <sub>2</sub> O                                                                    | -139                            |
| *CCO + *H <sub>2</sub> O + 2H <sub>2</sub> O                                                 | -102                            |
| *CHCO + *H <sub>2</sub> O + 2H <sub>2</sub> O                                                | -215                            |
| *CHCHO + *H <sub>2</sub> O + 2H <sub>2</sub> O                                               | -196                            |
| *CH <sub>2</sub> CO + *H <sub>2</sub> O + 2H <sub>2</sub> O                                  | -188                            |
| *CHCH <sub>2</sub> OH + *OH + 2H <sub>2</sub> O                                              | -193                            |
| *CHCHOH + *H <sub>2</sub> O + 2H <sub>2</sub> O                                              | -249                            |
| *CH <sub>2</sub> CHO + *H <sub>2</sub> O + 2H <sub>2</sub> O                                 | -306                            |
| <b>ETHYLENE</b>                                                                              | <b>Reaction energy (kJ/mol)</b> |
| *CH <sub>2</sub> CH <sub>2</sub> + *OH + *OH + 2H <sub>2</sub> O                             | -358                            |
| CH <sub>2</sub> CH <sub>2</sub> + *OH + *OH + 2H <sub>2</sub> O                              | -232                            |
| *CH <sub>2</sub> CH <sub>2</sub> + *H <sub>2</sub> O + *OH + 2H <sub>2</sub> O               | -391                            |
| *CH <sub>2</sub> CH <sub>2</sub> + *H <sub>2</sub> O + *H <sub>2</sub> O + 2H <sub>2</sub> O | -375                            |
| CH <sub>2</sub> CH <sub>2</sub> + *H <sub>2</sub> O + *OH + 2H <sub>2</sub> O                | -308                            |
| CH <sub>2</sub> CH <sub>2</sub> + *H <sub>2</sub> O + *H <sub>2</sub> O + 2H <sub>2</sub> O  | -263                            |
| CH <sub>2</sub> CH <sub>2</sub> + *H <sub>2</sub> O + 3H <sub>2</sub> O                      | -202                            |
| CH <sub>2</sub> CH <sub>2</sub> + * + 4H <sub>2</sub> O                                      | -143                            |
| <b>ETHYLENE alternative pathway</b>                                                          | <b>Reaction energy (kJ/mol)</b> |
| *CHCOH + *H <sub>2</sub> O + 2H <sub>2</sub> O                                               | -37                             |
| *CCH + *2H <sub>2</sub> O + 2H <sub>2</sub> O                                                | -189                            |
| *CHCH <sub>2</sub> + *OH + *H <sub>2</sub> O + 2H <sub>2</sub> O                             | -340                            |
| *CHCH <sub>2</sub> + *2H <sub>2</sub> O + 2H <sub>2</sub> O                                  | -352                            |
| *CH <sub>2</sub> CH <sub>2</sub> + *OH + *H <sub>2</sub> O + 2H <sub>2</sub> O               | -392                            |
| *CHCH <sub>3</sub> + *OH + *H <sub>2</sub> O + 2H <sub>2</sub> O                             | -355                            |
| *CH <sub>2</sub> CH <sub>3</sub> + *OH + *H <sub>2</sub> O + 2H <sub>2</sub> O               | -444                            |
| CH <sub>2</sub> CH <sub>2</sub> + *H + *OH + *H <sub>2</sub> O + 2H <sub>2</sub> O           | -344                            |
| CH <sub>2</sub> CH <sub>2</sub> + *2H <sub>2</sub> O + 2H <sub>2</sub> O                     | -264                            |
| <b>ETHANOL</b>                                                                               | <b>Reaction energy (kJ/mol)</b> |
| *CH <sub>2</sub> CHOH + *H <sub>2</sub> O + 2H <sub>2</sub> O                                | -292                            |
| *CH <sub>3</sub> CHO + *H <sub>2</sub> O + 2H <sub>2</sub> O                                 | -295                            |
| *CH <sub>2</sub> CH <sub>2</sub> O + *H <sub>2</sub> O + 2H <sub>2</sub> O                   | -311                            |
| *CH <sub>2</sub> CH <sub>2</sub> OH + *H <sub>2</sub> O + 2H <sub>2</sub> O                  | -355                            |
| *CH <sub>3</sub> CH <sub>2</sub> OH + *OH + 2H <sub>2</sub> O                                | -380                            |
| CH <sub>3</sub> CH <sub>2</sub> OH + *OH + 2H <sub>2</sub> O                                 | -327                            |
| *CH <sub>3</sub> CH <sub>2</sub> OH + *H <sub>2</sub> O + 2H <sub>2</sub> O                  | -347                            |
| CH <sub>3</sub> CH <sub>2</sub> OH + *H <sub>2</sub> O + 2H <sub>2</sub> O                   | -297                            |
| * + CH <sub>3</sub> CH <sub>2</sub> OH + 3H <sub>2</sub> O                                   | -223                            |

## 8. Reaction pathways resulting in C<sub>1</sub> products

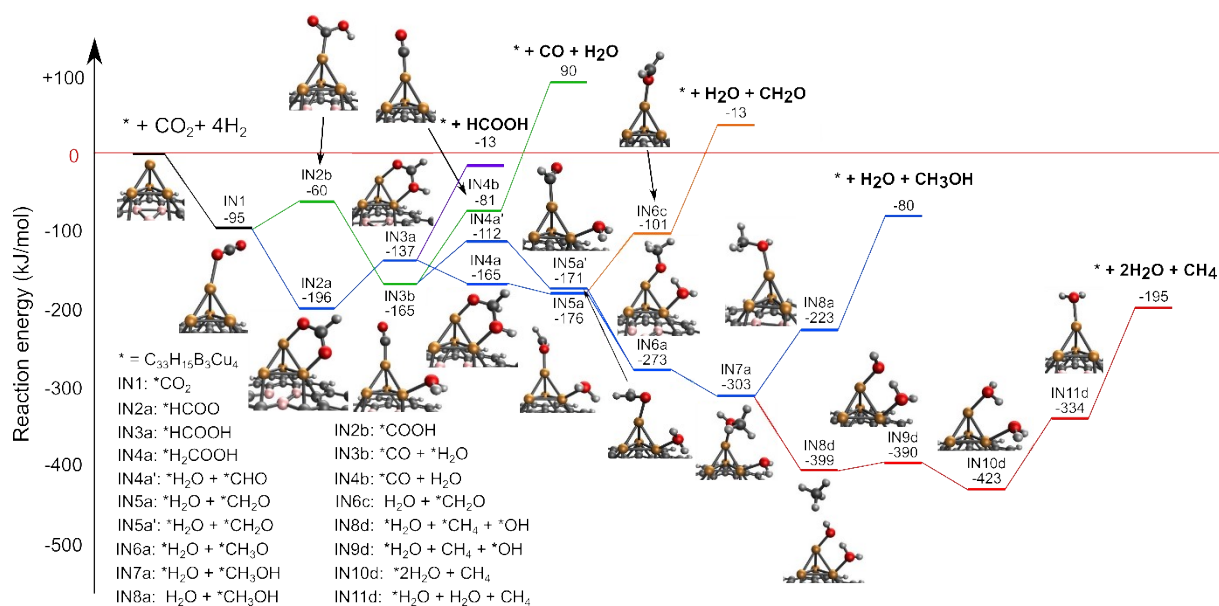

Figure S20. The thermally activated C<sub>1</sub> reaction pathway on a BDG bound Cu<sub>4</sub> cluster

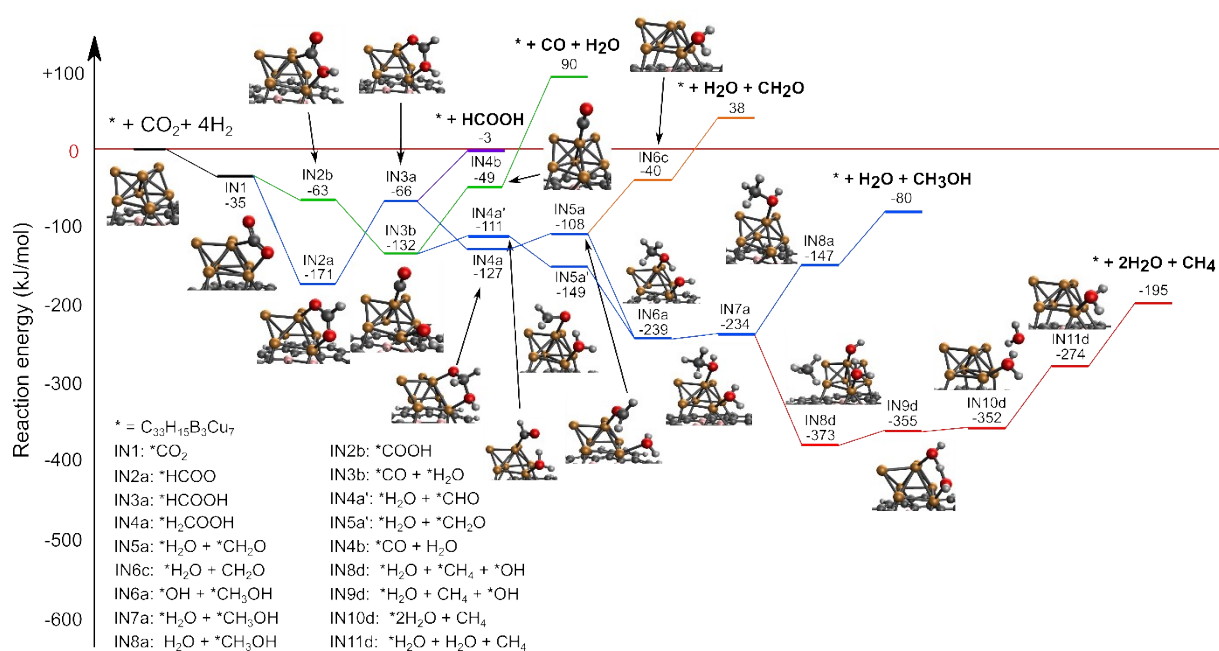

Figure S21. The thermally activated C<sub>1</sub> reaction pathway on a BDG bound Cu<sub>7</sub> cluster

## 9. Reaction pathways resulting in C<sub>2</sub> products

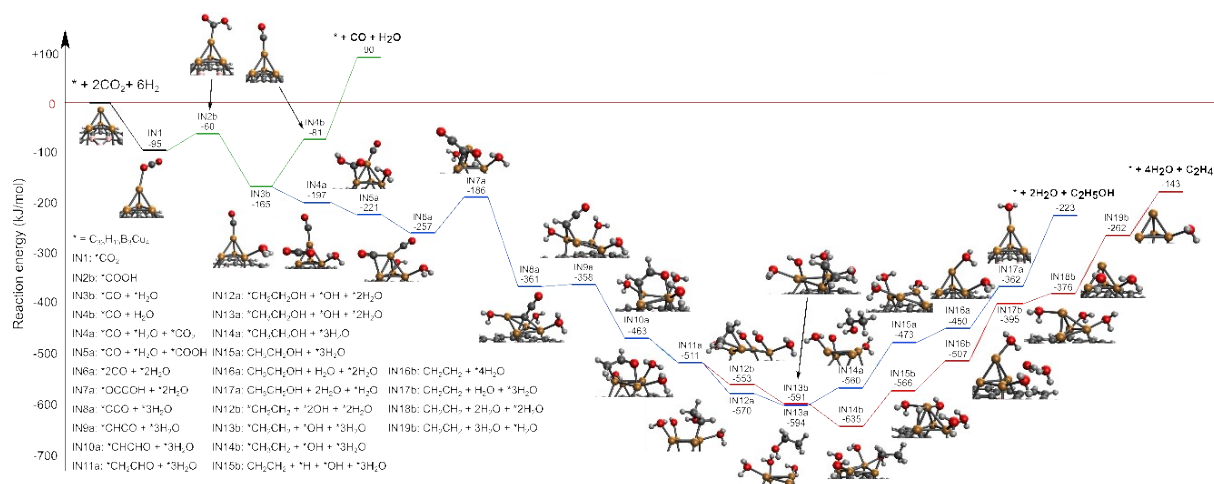

Figure S22. The thermally activated C<sub>2</sub> reaction pathway on a BDG bound Cu<sub>4</sub> cluster

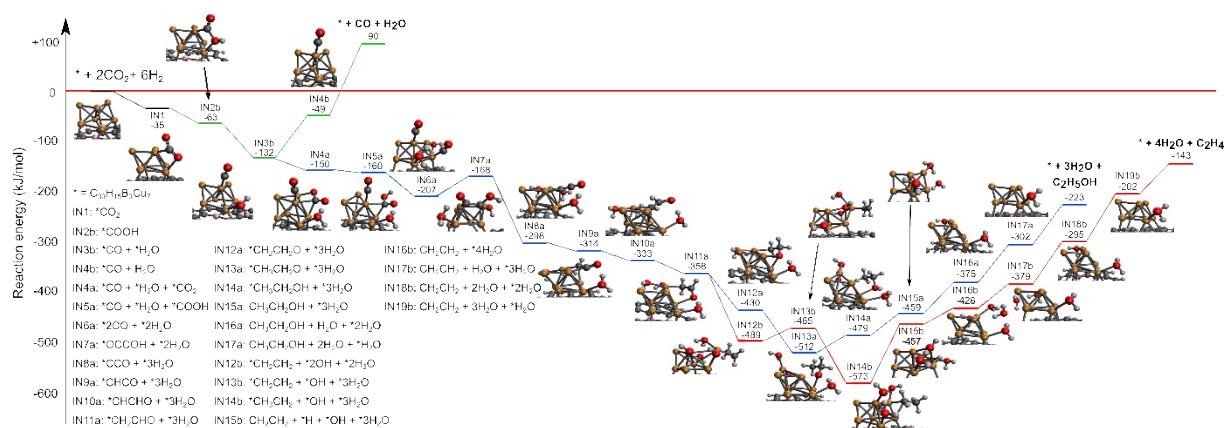

Figure S23. The thermally activated C<sub>2</sub> reaction pathway on a BDG bound Cu<sub>7</sub> cluster

## 10. The effect of applied overpotential

In Figure S23 the same electrochemical reaction pathway is shown, as in Figure 5. but at applied overpotential of  $\phi = 1\text{ V}$ , by adding  $z \cdot F \cdot \phi$  to the reaction free energy, where  $z$  is the number of electrons required for the reaction step,  $F$  is the Faraday-constant.<sup>xvi</sup>



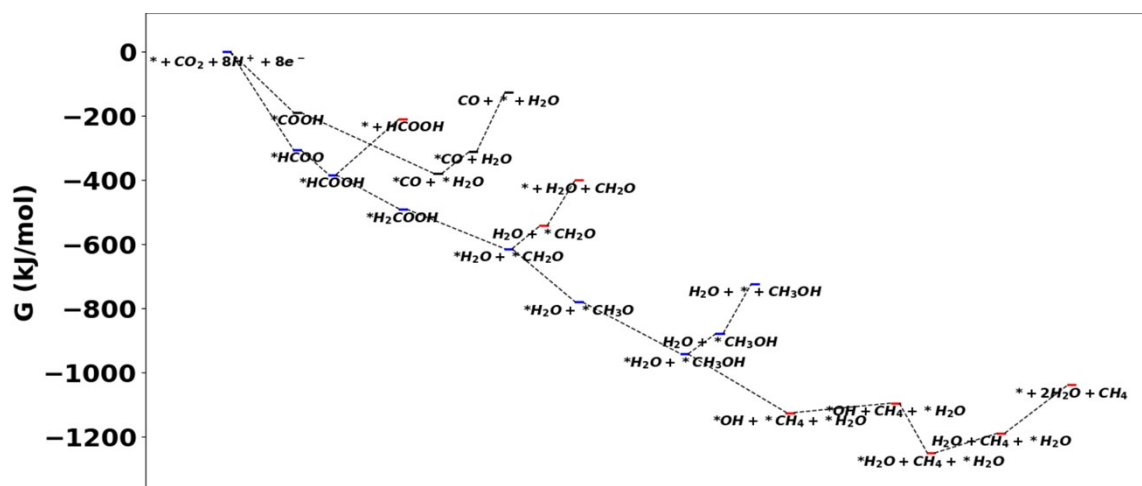

Figure S24.  $C_1$  reaction pathway in an aqueous solution at 298 K, 1 atm on a BDG bound  $Cu_4$  cluster at -1 V overpotential

## 11. The effect of adsorbed $H_2O$ species

In all reaction pathways presented in the main text, the  $H_2O$  byproduct molecules are bound to the cluster. As a comparison, we investigated the opposite limiting case, when all water molecules are dissociated for the onset of the  $C_2$  electroreduction pathway on BDG $Cu_7$  (Figure S24). We can clearly see, that despite these endergonic steps, the reaction free energy slopes downwards with the reaction coordinate, with the largest uphill step being only 68 kJ/mol. Thus the adsorbed explicit water molecules do not alter our conclusions.

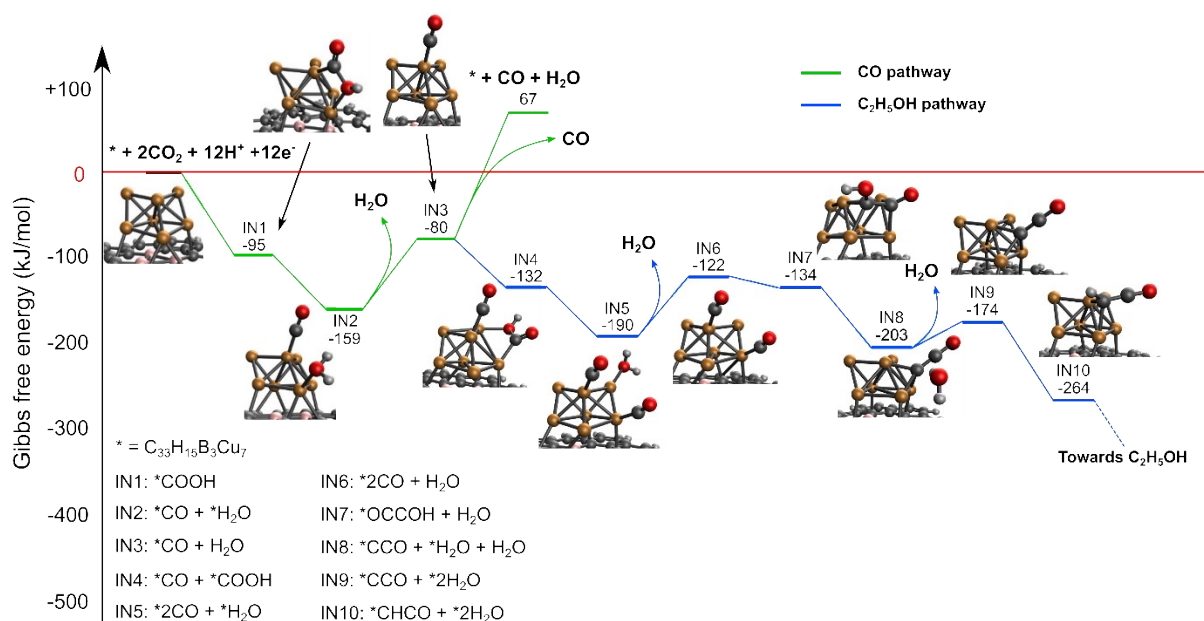

Figure S25. The effect of removing the adsorbed water molecules from the catalyst – in the example of BDG $Cu_7$ , in an aqueous solution, 298 K, 1 atm

## 12. The effect of vibrational contributions to the free energies

**Table S8.** The effect of vibrational contributions on the computed free energies

|                                                                                                   |                                                                                   |                                                                                   |                                                                                    |                                                                                     |
|---------------------------------------------------------------------------------------------------|-----------------------------------------------------------------------------------|-----------------------------------------------------------------------------------|------------------------------------------------------------------------------------|-------------------------------------------------------------------------------------|
|                                                                                                   |  |  |  |  |
|                                                                                                   | $\text{Cu}_4 + \text{CO}_2 = \text{Cu}_4\text{CO}_2$                              | $\text{Cu}_4 + \text{CO}_2 + \text{H}^+ + \text{e}^- = \text{Cu}_4\text{COOH}$    | $\text{Cu}_4 + \text{CO} = \text{Cu}_4\text{CO}$                                   | $\text{Cu}_4 + \text{CH}_3\text{OH} = \text{Cu}_4\text{CH}_3\text{OH}$              |
| $\Delta E + \Delta G_{\text{solv}}$<br>(kJ/mol)                                                   | -55                                                                               | -43                                                                               | -166                                                                               | -91                                                                                 |
| $\Delta E + \Delta H$<br>+ $\Delta G_{\text{solv}} + \Delta \text{ZPE}$<br>- $T\Delta S$ (kJ/mol) | -68                                                                               | -29                                                                               | -169                                                                               | -98                                                                                 |

In Table S7 the adsorption free energies of  $\text{CO}_2$ ,  $\text{CO}$ , and  $\text{CH}_3\text{OH}$  on  $\text{Cu}_4$  are shown alongside with the reaction free energy of  $^*\text{COOH}$  formation computed using CHE. In the first row only the solvation free energy was added to the gas phase SCF energy. In the second row ZPE was also taken into account as well as the vibrational entropies and enthalpies. It can be seen that the latter two terms do not have any significant effect in the case of  $\text{CO}_2$ ,  $\text{CO}$ , and  $\text{CH}_3\text{OH}$  adsorption. In the CHE model,  $\text{H}^+$  ions are in equilibrium with gas phase  $\text{H}_2$  molecules:  $\mu(\text{H}^+) + \mu(\text{e}^-) = \frac{1}{2}\mu(\text{H}_2)$ , where  $\mu(\text{H}_2)$  is equal to the gas phase SCF energy. In the gas phase, translational and rotational entropies and enthalpies cannot be neglected. This results a higher difference for  $^*\text{COOH}$  formation (14 kJ/mol) but still, when most reaction free energies for the computed pathways are several hundred kJ/mol, neglecting vibrational contributions does not alter our conclusions.

## 13. Hydrogen evolution reaction (HER) on $\text{BDGCu}_4$ and $\text{BDGCu}_7$

According to several previous works,<sup>xvii,xviii</sup> a suitable descriptor for estimating the reactivity of a catalyst in HER is the binding energy of an adsorbed  $^*\text{H}$  species, i.e. the reaction free energy for the  $^* + \text{H}^+ + \text{e}^- = ^*\text{H}$  reaction. The results are shown in Table S8.



**Table S9.** Descriptor for HER, computed on BDGCu<sub>4</sub> and BDGCu<sub>7</sub>

|                          | $\Delta G_{H^*}$ (kJ/mol) |
|--------------------------|---------------------------|
| <b>BDGCu<sub>4</sub></b> | -68                       |
| <b>BDGCu<sub>7</sub></b> | -86                       |

It is well visible that the \*H formation is favoured, but it is also known that the closer this value to 0 kJ/mol, the higher the expected exchange current for hydrogen evolution.<sup>xviii</sup> BDGCu clusters bind hydrogen too strongly for efficient hydrogen evolution reaction (for a commercial Pt catalyst, this descriptor is much closer to 0 kJ/mol,<sup>xvii,xviii</sup> thus HER is less favoured in this case.

## 14. Proton-electron transfer reaction

We applied the state-of-the-art Joint Density Functional Theory method implemented in the jDFTx program<sup>xix</sup> to explore the proton-electron transfer. We used a similar model to the one that was successfully applied to determine the reaction mechanism (including the proton-electron transfer) of the carbon-dioxide reduction on nickel single atom catalysts on nitrogen doped graphene.<sup>xx</sup> The atomistic model consists of the BDG-Cu<sub>4</sub> system, a CO<sub>2</sub> molecule and a protonated water chain. The full system is embedded in an implicit solvent, modelled using the charge-asymmetric nonlocally determined local-electric (CANDLE) solvation model<sup>xxi</sup> and included 0.1M NaI to consider the ionic strength of the electrolyte. Due to the inclusion of the proton, the total charge of the atomic system is +1, what is balanced by the iodine ions in the solvent. The computed free energies include the solvation contributions, while vibrational terms are neglected.

We used this model to investigate the protonation of the cluster bound CO<sub>2</sub> molecule (Figure S8). The large protonation free-energy clearly shows that at sufficiently acidic conditions, the cluster bound carbon-dioxide is protonated, thus the protonation can precede the reduction step.

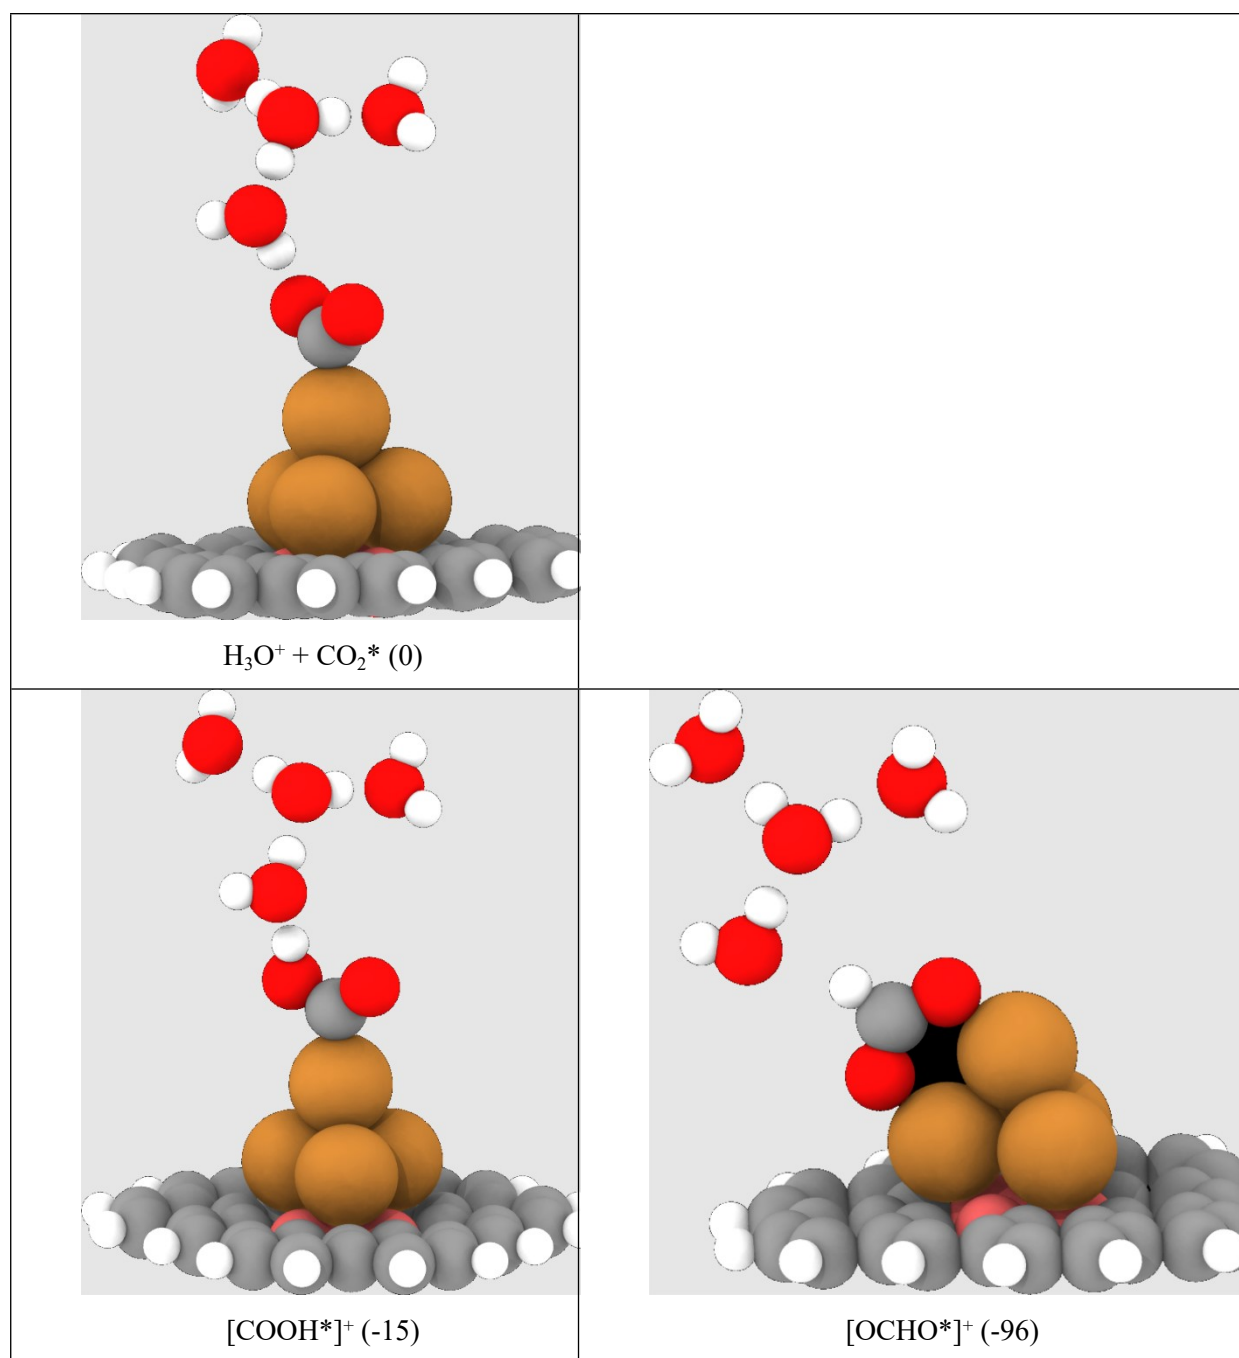

**Figure S26.** Relative free energies (in parentheses, kJ/mol) of various protonation states of the cluster bound  $\text{CO}_2$  molecule. Asterisk indicates an adsorbed species.

## 15. Cartesian coordinates of all reaction intermediates in an aqueous solution

### a. $\text{Cu}_4$ cluster – $\text{C}_1$ pathway

\* =  $\text{C}_{33}\text{H}_{15}\text{B}_3\text{Cu}_4$

|   |          |          |         |   |         |          |         |
|---|----------|----------|---------|---|---------|----------|---------|
| C | -0.22808 | -4.87254 | 0.74118 | C | 0.03817 | -2.42281 | 0.81255 |
| C | -0.83170 | -3.56905 | 0.83024 | C | 1.44121 | -2.64706 | 0.67630 |

|   |          |          |         |    |          |          |          |
|---|----------|----------|---------|----|----------|----------|----------|
| C | 2.01587  | -3.92906 | 0.55709 | C  | -2.82188 | -2.14144 | 0.99536  |
| C | 1.13020  | -5.05124 | 0.60868 | C  | -2.01705 | -0.94815 | 0.98564  |
| C | 3.43571  | -3.99907 | 0.39805 | B  | -0.26746 | 1.13914  | 0.89492  |
| C | 4.19593  | -2.85333 | 0.33589 | B  | -0.47090 | -0.96593 | 0.92514  |
| C | 3.61907  | -1.53766 | 0.42159 | C  | 4.41459  | -0.38264 | 0.33006  |
| C | 2.19682  | -1.43826 | 0.61525 | C  | -2.22401 | -3.41217 | 0.93894  |
| B | 1.44820  | -0.09026 | 0.74156 | H  | 5.49443  | -0.48887 | 0.19548  |
| C | 2.44041  | 1.08512  | 0.57686 | H  | -1.97333 | 4.87049  | 0.83677  |
| C | 1.93056  | 2.41694  | 0.60967 | H  | 0.23436  | 5.90201  | 0.63220  |
| C | 2.73935  | 3.56252  | 0.46406 | H  | 4.80004  | 4.22419  | 0.20183  |
| C | 4.14580  | 3.35507  | 0.30407 | H  | 5.74901  | 1.94500  | 0.13854  |
| C | 4.67271  | 2.08405  | 0.26853 | H  | 2.68685  | 5.74091  | 0.39331  |
| C | 3.85535  | 0.90530  | 0.38670 | H  | -4.20453 | 3.87867  | 0.98643  |
| C | 2.08489  | 4.83421  | 0.49021 | H  | -5.70097 | 1.91563  | 1.09369  |
| C | 0.71784  | 4.92184  | 0.62404 | H  | -5.95052 | -0.68089 | 1.13897  |
| C | -0.12328 | 3.75960  | 0.73951 | H  | -4.85934 | -2.89416 | 1.09295  |
| C | 0.51219  | 2.46826  | 0.75114 | H  | -2.86037 | -4.30106 | 0.95980  |
| C | -1.52005 | 3.87562  | 0.84316 | H  | -0.89000 | -5.74171 | 0.77191  |
| C | -2.35036 | 2.74488  | 0.92555 | H  | 1.54747  | -6.05836 | 0.53562  |
| C | -1.78840 | 1.42070  | 0.95084 | H  | 3.91146  | -4.97952 | 0.32040  |
| C | -2.68467 | 0.31247  | 1.01925 | H  | 5.27891  | -2.92571 | 0.20760  |
| C | -4.08770 | 0.44959  | 1.05702 | Cu | 0.65463  | -1.27739 | -1.01808 |
| C | -4.61770 | 1.77825  | 1.05502 | Cu | -1.34686 | 0.15768  | -0.85255 |
| C | -3.78243 | 2.87065  | 0.99521 | Cu | -0.11034 | 0.00532  | -2.94193 |
| C | -4.86119 | -0.75326 | 1.09599 | Cu | 0.89132  | 1.18146  | -1.05565 |
| C | -4.25063 | -1.98660 | 1.06940 |    |          |          |          |

**\*COOH**

|   |         |          |          |   |          |         |          |
|---|---------|----------|----------|---|----------|---------|----------|
| C | 2.58421 | -0.44227 | -0.52151 | C | 4.32520  | 2.83379 | 0.10683  |
| C | 2.89222 | 0.94234  | -0.39725 | C | 3.27036  | 3.68788 | -0.13502 |
| C | 4.16599 | 1.41993  | -0.00550 | C | 1.96371  | 3.21756 | -0.50597 |
| C | 5.17883 | 0.44541  | 0.24376  | C | 1.78156  | 1.79897 | -0.65330 |
| C | 4.91045 | -0.90217 | 0.13040  | C | 0.89723  | 4.10640 | -0.72971 |
| C | 3.61419 | -1.40328 | -0.23626 | C | -0.38853 | 3.65172 | -1.07309 |

|    |          |          |          |   |          |          |          |
|----|----------|----------|----------|---|----------|----------|----------|
| C  | -1.47971 | 4.56538  | -1.27550 | C | -1.27998 | -1.96286 | -1.53203 |
| C  | -2.75246 | 4.14186  | -1.59384 | C | 3.35454  | -2.78294 | -0.32497 |
| C  | -3.04810 | 2.75387  | -1.74481 | C | -3.65461 | -1.48533 | -2.03223 |
| C  | -1.97658 | 1.84304  | -1.57880 | B | 0.43529  | 1.16570  | -1.06386 |
| C  | -0.65161 | 2.24831  | -1.24421 | H | -4.65964 | -1.85653 | -2.24997 |
| C  | -4.33012 | 2.20426  | -2.04726 | H | 1.06827  | 5.18040  | -0.61716 |
| C  | -4.51252 | 0.84133  | -2.14728 | H | -1.27707 | 5.63313  | -1.15929 |
| C  | -3.44204 | -0.09739 | -1.95158 | H | -5.17452 | 2.88219  | -2.19254 |
| C  | -2.13431 | 0.43086  | -1.67221 | H | -5.50495 | 0.44254  | -2.37233 |
| B  | -0.89887 | -0.46938 | -1.45040 | H | -3.55522 | 4.87078  | -1.72838 |
| Cu | -1.28212 | 0.80032  | 0.37182  | H | 3.41373  | 4.76701  | -0.03763 |
| Cu | -0.68810 | -0.14745 | 2.57495  | H | 5.29970  | 3.23486  | 0.39543  |
| Cu | 1.07433  | 0.38095  | 0.95130  | H | 6.17668  | 0.78210  | 0.53461  |
| Cu | -0.45109 | -1.50637 | 0.51540  | H | 5.69939  | -1.63103 | 0.33252  |
| B  | 1.15402  | -0.84598 | -0.94188 | H | 4.15954  | -3.48992 | -0.10751 |
| C  | 1.00022  | -2.38312 | -0.97012 | H | 2.64272  | -5.37291 | -0.50368 |
| C  | 2.08247  | -3.27953 | -0.66316 | H | 0.41523  | -6.28023 | -1.05907 |
| C  | 1.81794  | -4.69068 | -0.72434 | H | -2.07596 | -5.81904 | -1.66623 |
| C  | 0.57463  | -5.19961 | -1.03511 | H | -3.86304 | -4.16899 | -2.08983 |
| C  | -0.52301 | -4.33379 | -1.32095 | O | -1.73412 | -0.78683 | 5.13204  |
| C  | -0.27020 | -2.93993 | -1.29660 | C | -1.08499 | 0.02122  | 4.47588  |
| C  | -1.85301 | -4.75019 | -1.62794 | O | -0.61418 | 1.13105  | 5.16376  |
| C  | -2.84972 | -3.82709 | -1.86433 | H | -0.12065 | 1.68885  | 4.52797  |
| C  | -2.61738 | -2.41008 | -1.81302 |   |          |          |          |

**\*H<sub>2</sub>O + \*CO**

|   |         |          |         |   |         |          |          |
|---|---------|----------|---------|---|---------|----------|----------|
| C | 2.54301 | 0.24443  | 0.92895 | C | 2.16370 | -3.51784 | 0.81953  |
| C | 2.79833 | -1.15974 | 0.84095 | C | 1.80953 | -2.19016 | 0.90389  |
| C | 4.14420 | -1.56118 | 0.69587 | C | 3.86909 | -5.30352 | 0.58903  |
| C | 5.23591 | -0.64513 | 0.60880 | C | 5.19917 | -5.72620 | 0.42108  |
| C | 4.94077 | 0.76518  | 0.64512 | C | 5.53658 | -7.12473 | 0.34734  |
| C | 3.56958 | 1.15721  | 0.83984 | C | 6.82350 | -7.55964 | 0.13044  |
| C | 4.54434 | -2.92531 | 0.56355 | C | 7.89572 | -6.62571 | -0.03467 |
| C | 3.52711 | -3.94235 | 0.64539 | C | 7.58679 | -5.25843 | 0.08851  |

|    |          |          |          |    |          |          |          |
|----|----------|----------|----------|----|----------|----------|----------|
| C  | 6.26692  | -4.77156 | 0.30575  | C  | 5.96201  | 1.71716  | 0.48604  |
| C  | 9.24147  | -6.96624 | -0.38710 | B  | 8.05401  | -2.75127 | -0.00666 |
| C  | 10.17862 | -5.98582 | -0.61798 | Cu | 6.87799  | -3.73723 | -1.70453 |
| C  | 9.86944  | -4.58283 | -0.50841 | B  | 6.04941  | -3.24213 | 0.36781  |
| C  | 8.53115  | -4.21595 | -0.13406 | H  | 5.71163  | 2.78059  | 0.53036  |
| C  | 10.84102 | -3.60082 | -0.76756 | H  | 3.07861  | -6.05502 | 0.67008  |
| C  | 10.54740 | -2.23044 | -0.67871 | H  | 1.39366  | -4.29155 | 0.87841  |
| C  | 9.22753  | -1.78383 | -0.30963 | H  | 1.51350  | 0.58773  | 1.05946  |
| C  | 9.00284  | -0.37911 | -0.19089 | H  | 3.35055  | 2.22671  | 0.89851  |
| C  | 9.99293  | 0.59033  | -0.45957 | H  | 0.76037  | -1.90873 | 1.02517  |
| C  | 11.29239 | 0.11737  | -0.82234 | H  | 4.72583  | -7.85090 | 0.45052  |
| C  | 11.55301 | -1.23074 | -0.92125 | H  | 7.03790  | -8.62895 | 0.05668  |
| C  | 9.61217  | 1.96304  | -0.33346 | H  | 9.51026  | -8.02055 | -0.49021 |
| C  | 8.32158  | 2.31261  | -0.00597 | H  | 11.19721 | -6.26140 | -0.90356 |
| C  | 7.28964  | 1.33627  | 0.22554  | H  | 11.85155 | -3.91180 | -1.04744 |
| C  | 7.66077  | -0.05491 | 0.16971  | H  | 12.55423 | -1.57291 | -1.19634 |
| Cu | 7.55104  | -1.34394 | -1.70831 | H  | 12.08295 | 0.84494  | -1.02223 |
| B  | 6.66145  | -1.20437 | 0.41567  | H  | 10.36088 | 2.73813  | -0.51642 |
| Cu | 5.25405  | -1.90229 | -1.28232 | H  | 8.04837  | 3.36852  | 0.06852  |
| Cu | 6.13665  | -2.16028 | -3.56119 | O  | 7.18182  | -5.31728 | -3.02997 |
| C  | 5.78762  | -2.33851 | -5.38007 | H  | 7.40560  | -5.01221 | -3.93007 |
| O  | 5.52891  | -2.36565 | -6.49196 | H  | 7.96498  | -5.82667 | -2.73747 |

**\*CO**

|   |          |         |          |    |          |          |          |
|---|----------|---------|----------|----|----------|----------|----------|
| C | -0.10296 | 2.43708 | -0.83910 | Cu | -0.75271 | 1.16546  | 0.90893  |
| C | -1.52876 | 2.49190 | -0.84644 | B  | -1.22745 | -0.04616 | -0.96318 |
| C | -2.25844 | 3.69470 | -0.75983 | Cu | -0.71290 | -1.26699 | 0.89318  |
| C | -1.51075 | 4.91260 | -0.69753 | B  | 0.62967  | -1.06907 | -0.93764 |
| C | -0.13476 | 4.89768 | -0.69054 | Cu | 1.37484  | -0.01289 | 0.93438  |
| C | 0.62401  | 3.67582 | -0.74058 | Cu | -0.05958 | -0.05878 | 2.98034  |
| C | -2.13840 | 1.20198 | -0.88547 | C  | -4.23334 | -0.11054 | -0.82238 |
| C | -3.57539 | 1.13111 | -0.82691 | C  | -3.52334 | -1.32296 | -0.83606 |
| C | -4.30824 | 2.36879 | -0.77473 | C  | -2.08444 | -1.33285 | -0.89753 |
| C | -3.68507 | 3.59531 | -0.74101 | C  | -1.42122 | -2.59642 | -0.87348 |

|   |          |          |          |   |          |          |          |
|---|----------|----------|----------|---|----------|----------|----------|
| C | -2.09975 | -3.82979 | -0.79471 | B | 0.58475  | 1.05483  | -0.92047 |
| C | -3.52920 | -3.79043 | -0.77003 | H | 2.55400  | 4.63983  | -0.63308 |
| C | -4.20312 | -2.59090 | -0.79220 | H | 2.74907  | -4.57214 | -0.70338 |
| C | -1.30090 | -5.01538 | -0.74810 | H | 4.85250  | -3.32354 | -0.64834 |
| C | 0.07326  | -4.94238 | -0.74892 | H | 6.05268  | 1.40881  | -0.56662 |
| C | 0.77972  | -3.68906 | -0.79018 | H | 4.70902  | 3.47988  | -0.58711 |
| C | 0.00109  | -2.48107 | -0.87159 | H | 6.10774  | -1.19808 | -0.59257 |
| C | 2.18318  | -3.63774 | -0.75528 | H | 0.66705  | -5.85915 | -0.70268 |
| C | 2.87871  | -2.41687 | -0.75818 | H | -1.79883 | -5.98700 | -0.70207 |
| C | 4.31547  | -2.37225 | -0.68884 | H | -4.08381 | -4.73101 | -0.72282 |
| C | 5.01678  | -1.18867 | -0.65636 | H | -5.29579 | -2.58097 | -0.76171 |
| C | 4.33679  | 0.06935  | -0.69205 | H | -5.32601 | -0.13414 | -0.78530 |
| C | 2.93144  | 0.04102  | -0.79776 | H | -5.39960 | 2.31222  | -0.74721 |
| C | 2.17004  | -1.16547 | -0.83382 | H | -4.27892 | 4.51131  | -0.68837 |
| C | 2.11989  | 1.21445  | -0.81362 | H | -2.04990 | 5.86167  | -0.64456 |
| C | 2.77524  | 2.49311  | -0.71635 | H | 0.41927  | 5.83806  | -0.63120 |
| C | 4.21270  | 2.50758  | -0.64455 | C | 0.00261  | -0.07534 | 4.85001  |
| C | 4.96315  | 1.35421  | -0.63215 | O | 0.07174  | -0.08895 | 5.98794  |
| C | 2.02854  | 3.68315  | -0.69924 |   |          |          |          |

**\*CHO + \*H<sub>2</sub>O**

|   |          |          |          |   |         |          |          |
|---|----------|----------|----------|---|---------|----------|----------|
| C | 7.65521  | -0.06825 | 0.08120  | C | 9.25747 | -6.98914 | -0.33059 |
| C | 9.01082  | -0.39871 | -0.20678 | C | 7.90567 | -6.64975 | -0.01694 |
| C | 10.01093 | 0.57343  | -0.45280 | C | 7.59157 | -5.27505 | 0.08883  |
| C | 9.61883  | 1.94372  | -0.37571 | C | 8.54424 | -4.23803 | -0.11173 |
| C | 8.31340  | 2.29505  | -0.10436 | C | 6.26969 | -4.79387 | 0.29113  |
| C | 7.27942  | 1.32023  | 0.11315  | C | 5.20430 | -5.74840 | 0.42101  |
| C | 11.32207 | 0.09811  | -0.75553 | C | 5.54467 | -7.14453 | 0.35702  |
| C | 11.58875 | -1.25294 | -0.82159 | C | 6.83479 | -7.58023 | 0.14572  |
| C | 10.57958 | -2.25212 | -0.59972 | C | 3.87502 | -5.32603 | 0.60693  |
| C | 9.24901  | -1.80266 | -0.28263 | C | 3.53048 | -3.96419 | 0.66133  |
| C | 10.87554 | -3.62429 | -0.66766 | C | 4.54099 | -2.94562 | 0.54819  |
| C | 9.89356  | -4.60594 | -0.44057 | C | 4.14118 | -1.58097 | 0.65180  |
| C | 10.20320 | -6.00776 | -0.53533 | C | 2.79347 | -1.17869 | 0.82184  |

|    |         |          |          |   |          |          |          |
|----|---------|----------|----------|---|----------|----------|----------|
| C  | 1.81365 | -2.21001 | 0.93089  | H | 3.08720  | -6.07810 | 0.70444  |
| C  | 2.17172 | -3.53960 | 0.85920  | H | 1.40491  | -4.31344 | 0.94891  |
| C  | 5.22033 | -0.66087 | 0.51129  | H | 1.50822  | 0.56802  | 1.01905  |
| C  | 4.92489 | 0.74758  | 0.52908  | H | 3.33426  | 2.20901  | 0.77253  |
| C  | 3.55710 | 1.13942  | 0.73611  | H | 0.76661  | -1.93162 | 1.07364  |
| C  | 2.53541 | 0.22407  | 0.87430  | H | 4.73648  | -7.87232 | 0.46750  |
| Cu | 5.26481 | -1.99115 | -1.32233 | H | 7.04929  | -8.64995 | 0.08232  |
| B  | 6.04301 | -3.26626 | 0.33466  | H | 9.53084  | -8.04320 | -0.42230 |
| Cu | 6.92478 | -3.80394 | -1.71759 | H | 11.22954 | -6.28631 | -0.78792 |
| O  | 7.28445 | -5.35365 | -3.04755 | H | 11.89441 | -3.93725 | -0.91164 |
| B  | 6.64834 | -1.21733 | 0.31271  | H | 12.60024 | -1.59503 | -1.05557 |
| Cu | 7.60492 | -1.41402 | -1.73156 | H | 12.11834 | 0.82349  | -0.93987 |
| B  | 8.06977 | -2.77239 | -0.01304 | H | 10.37046 | 2.71879  | -0.54531 |
| C  | 5.94616 | 1.69896  | 0.35443  | H | 8.03506  | 3.35113  | -0.05937 |
| Cu | 6.18909 | -2.18543 | -3.56845 | H | 7.49977  | -5.03256 | -3.94447 |
| C  | 5.77633 | -1.81688 | -5.42240 | H | 8.08201  | -5.84380 | -2.75996 |
| O  | 4.68343 | -1.93732 | -5.95825 | H | 6.63065  | -1.44604 | -6.06156 |
| H  | 5.69265 | 2.76214  | 0.38446  |   |          |          |          |

**\*CH<sub>2</sub>O + \*H<sub>2</sub>O alternative pathway higher in free energy**

|   |         |          |         |   |          |          |          |
|---|---------|----------|---------|---|----------|----------|----------|
| C | 2.53999 | 0.21414  | 0.81149 | C | 7.90904  | -6.66625 | 0.05580  |
| C | 2.79680 | -1.19128 | 0.75353 | C | 6.83713  | -7.59750 | 0.22833  |
| C | 4.14328 | -1.59397 | 0.61991 | C | 5.54619  | -7.15928 | 0.41706  |
| C | 5.23612 | -0.68011 | 0.52004 | C | 8.54331  | -4.25815 | -0.09189 |
| C | 4.93891 | 0.73001  | 0.52312 | C | 9.88738  | -4.63262 | -0.43322 |
| C | 3.56673 | 1.12485  | 0.70471 | C | 10.20043 | -6.03622 | -0.50048 |
| C | 1.80871 | -2.22094 | 0.83819 | C | 9.26058  | -7.01318 | -0.26140 |
| C | 2.16406 | -3.54988 | 0.78360 | C | 10.86197 | -3.65663 | -0.70739 |
| C | 3.52841 | -3.97614 | 0.62225 | C | 10.56380 | -2.28522 | -0.66775 |
| C | 4.54443 | -2.96006 | 0.52157 | C | 11.56844 | -1.29030 | -0.93252 |
| C | 3.87358 | -5.33742 | 0.60023 | C | 11.30252 | 0.05934  | -0.87829 |
| C | 5.20650 | -5.76081 | 0.45256 | C | 9.99856  | 0.53843  | -0.53995 |
| C | 6.27264 | -4.80738 | 0.32433 | C | 9.00792  | -0.42564 | -0.25395 |
| C | 7.59565 | -5.29464 | 0.13802 | C | 9.23859  | -1.83227 | -0.32835 |

|    |         |          |          |   |          |          |          |
|----|---------|----------|----------|---|----------|----------|----------|
| C  | 9.61420 | 1.91305  | -0.45329 | H | 1.39487  | -4.32292 | 0.85817  |
| C  | 8.32032 | 2.26717  | -0.14393 | H | 1.51042  | 0.55981  | 0.93424  |
| C  | 7.28853 | 1.29496  | 0.10452  | H | 3.34720  | 2.19531  | 0.74084  |
| C  | 7.66147 | -0.09632 | 0.08704  | H | 0.75948  | -1.93737 | 0.95275  |
| B  | 6.66416 | -1.24308 | 0.35588  | H | 4.73554  | -7.88439 | 0.52755  |
| Cu | 7.59028 | -1.43251 | -1.75021 | H | 7.05378  | -8.66776 | 0.18391  |
| Cu | 6.18510 | -2.20743 | -3.56364 | H | 9.53319  | -8.06894 | -0.33412 |
| C  | 5.56691 | -1.23392 | -5.27312 | H | 11.22373 | -6.31742 | -0.76252 |
| O  | 5.83699 | -2.45333 | -5.56307 | H | 11.87655 | -3.97429 | -0.96348 |
| C  | 5.95904 | 1.68038  | 0.34782  | H | 12.57267 | -1.63731 | -1.18930 |
| B  | 8.06231 | -2.79219 | -0.01331 | H | 12.09163 | 0.78372  | -1.09504 |
| Cu | 6.91761 | -3.83671 | -1.71233 | H | 10.36299 | 2.68489  | -0.64888 |
| O  | 7.26530 | -5.41299 | -3.00332 | H | 8.04443  | 3.32397  | -0.09675 |
| B  | 6.05134 | -3.27779 | 0.34434  | H | 7.48032  | -5.12483 | -3.91100 |
| Cu | 5.27438 | -1.99557 | -1.33363 | H | 8.05964  | -5.90047 | -2.70283 |
| H  | 5.70663 | 2.74412  | 0.36805  | H | 6.31153  | -0.43410 | -5.45788 |
| H  | 3.08428 | -6.08865 | 0.69359  | H | 4.52075  | -0.91905 | -5.08722 |

**\*HCOO**

|    |          |          |          |    |          |          |          |
|----|----------|----------|----------|----|----------|----------|----------|
| C  | 0.49430  | 2.47118  | 1.33527  | Cu | 0.45032  | 0.45320  | -2.69306 |
| C  | 1.86622  | 2.13810  | 1.49529  | O  | 0.92701  | -0.88654 | -4.05192 |
| C  | 2.87856  | 3.11024  | 1.69922  | C  | 1.10060  | -2.06084 | -3.58556 |
| C  | 2.46969  | 4.47486  | 1.76337  | O  | 0.99415  | -2.43539 | -2.37751 |
| C  | 1.14526  | 4.82659  | 1.60472  | C  | 3.81847  | -1.06975 | 1.47666  |
| C  | 0.11381  | 3.85620  | 1.36726  | C  | 2.83393  | -2.05453 | 1.27813  |
| C  | 2.13650  | 0.74178  | 1.37790  | C  | 1.45414  | -1.68982 | 1.11958  |
| C  | 3.49780  | 0.29859  | 1.52172  | C  | 0.50074  | -2.72185 | 0.89625  |
| C  | 4.50796  | 1.29507  | 1.74799  | C  | 0.84351  | -4.09102 | 0.81945  |
| C  | 4.21859  | 2.64088  | 1.82932  | C  | 2.21679  | -4.43030 | 1.01494  |
| Cu | 1.08956  | 1.29681  | -0.51996 | C  | 3.16445  | -3.45316 | 1.23138  |
| B  | 0.95634  | -0.23017 | 1.14334  | C  | -0.20748 | -5.01148 | 0.52411  |
| Cu | 0.47358  | -1.18879 | -0.87162 | C  | -1.49089 | -4.56812 | 0.28831  |
| B  | -1.05277 | -0.70971 | 0.74850  | C  | -1.84625 | -3.17525 | 0.33349  |
| Cu | -1.23934 | 0.74950  | -0.98643 | C  | -0.81580 | -2.23192 | 0.66515  |



|   |          |          |          |   |          |          |          |
|---|----------|----------|----------|---|----------|----------|----------|
| C | -3.15705 | -2.74304 | 0.06568  | H | -5.59283 | -1.72049 | -0.40502 |
| C | -3.50863 | -1.38266 | 0.10530  | H | -5.59806 | 3.13095  | 0.12708  |
| C | -4.85570 | -0.95379 | -0.15313 | H | -3.82855 | 4.75805  | 0.68303  |
| C | -5.23817 | 0.36958  | -0.09573 | H | -6.27201 | 0.65186  | -0.30775 |
| C | -4.29802 | 1.38852  | 0.23856  | H | -2.27824 | -5.28702 | 0.04779  |
| C | -2.96850 | 0.97958  | 0.51598  | H | 0.02238  | -6.07827 | 0.47095  |
| C | -2.53421 | -0.37764 | 0.43858  | H | 2.51370  | -5.48115 | 0.97604  |
| C | -1.93055 | 1.89233  | 0.84341  | H | 4.21181  | -3.73522 | 1.36648  |
| C | -2.23335 | 3.29591  | 0.88828  | H | 4.86082  | -1.37662 | 1.59832  |
| C | -3.59018 | 3.69244  | 0.63517  | H | 5.54073  | 0.95459  | 1.85871  |
| C | -4.58052 | 2.78430  | 0.32286  | H | 5.01930  | 3.36511  | 1.99617  |
| C | -1.22604 | 4.23934  | 1.16548  | H | 3.22500  | 5.24593  | 1.93263  |
| B | -0.51390 | 1.33116  | 1.08814  | H | 0.85468  | 5.87930  | 1.64728  |
| H | -1.48662 | 5.30058  | 1.19772  | H | 1.37557  | -2.84198 | -4.32123 |
| H | -3.92201 | -3.48313 | -0.18416 |   |          |          |          |

**\*HCOOH**

|   |          |          |          |    |          |           |          |
|---|----------|----------|----------|----|----------|-----------|----------|
| C | -1.69483 | -4.94828 | -0.68737 | C  | -5.63968 | -7.81109  | -0.00172 |
| C | -2.45672 | -3.74164 | -0.66847 | C  | -6.17602 | -9.13346  | 0.19942  |
| C | -1.87874 | -2.45924 | -0.74400 | C  | -7.58459 | -9.25046  | 0.47021  |
| C | -0.45722 | -2.38854 | -0.89467 | C  | -8.40812 | -8.15497  | 0.59929  |
| C | 0.30838  | -3.53142 | -0.92549 | C  | -5.34302 | -10.26404 | 0.14207  |
| C | -0.26438 | -4.84737 | -0.80768 | C  | -3.95774 | -10.14693 | -0.06390 |
| C | -2.75792 | -1.33644 | -0.61952 | C  | -3.34941 | -8.85772  | -0.27417 |
| C | -4.10414 | -1.51395 | -0.39674 | C  | -1.92893 | -8.79994  | -0.40166 |
| C | -4.70163 | -2.81899 | -0.27702 | C  | -1.09481 | -9.93842  | -0.35978 |
| C | -3.84678 | -3.96589 | -0.43878 | C  | -1.73215 | -11.20916 | -0.20312 |
| C | -6.07029 | -2.97396 | -0.00122 | C  | -3.09828 | -11.30165 | -0.06345 |
| C | -6.65558 | -4.24259 | 0.15249  | C  | -1.42939 | -7.46929  | -0.52734 |
| C | -8.05742 | -4.39158 | 0.44055  | C  | -0.00711 | -7.28470  | -0.65382 |
| C | -8.65177 | -5.62386 | 0.59432  | C  | 0.82671  | -8.45735  | -0.64276 |
| C | -7.89250 | -6.82807 | 0.46144  | C  | 0.31253  | -9.72601  | -0.49573 |
| C | -6.52125 | -6.69896 | 0.15069  | Cu | -2.60386 | -7.51174  | 1.39399  |
| C | -5.86688 | -5.43827 | 0.00652  | B  | -4.15219 | -7.54057  | -0.31059 |

|    |          |           |          |   |          |           |          |
|----|----------|-----------|----------|---|----------|-----------|----------|
| Cu | -4.78950 | -6.52160  | 1.65903  | H | 1.90568  | -8.31548  | -0.74757 |
| B  | -4.35330 | -5.42424  | -0.31510 | H | -1.11516 | -12.11135 | -0.18576 |
| Cu | -2.80960 | -5.00763  | 1.26645  | H | -7.99684 | -10.25595 | 0.59169  |
| B  | -2.43857 | -6.29634  | -0.53583 | H | -9.47030 | -8.29008  | 0.81897  |
| C  | 0.54074  | -5.99879  | -0.80295 | H | -9.71863 | -5.69549  | 0.82094  |
| O  | -2.02723 | -3.46096  | 2.61130  | H | -8.65427 | -3.48186  | 0.54571  |
| C  | -1.89680 | -3.61319  | 3.93624  | H | -6.69442 | -2.08273  | 0.10908  |
| O  | -2.25614 | -4.64565  | 4.49292  | H | -4.75689 | -0.64363  | -0.28884 |
| Cu | -3.10144 | -6.18949  | 3.38144  | H | -2.34079 | -0.32831  | -0.68644 |
| H  | 1.62438  | -5.89051  | -0.90446 | H | 0.01778  | -1.40694  | -0.96925 |
| H  | -5.77923 | -11.25627 | 0.28799  | H | 1.39421  | -3.45609  | -1.02756 |
| H  | -3.56482 | -12.28160 | 0.06880  | H | -1.45301 | -2.75717  | 4.46826  |
| H  | 0.98062  | -10.59099 | -0.48211 | H | -1.70279 | -2.58711  | 2.29622  |

**\*H<sub>2</sub>COOH**

|   |          |          |          |    |          |           |          |
|---|----------|----------|----------|----|----------|-----------|----------|
| C | -1.65171 | -4.96555 | -0.70135 | C  | -7.55293 | -9.23195  | 0.56628  |
| C | -2.40491 | -3.75816 | -0.65384 | C  | -8.37007 | -8.12750  | 0.69059  |
| C | -1.82041 | -2.47543 | -0.76216 | C  | -5.32070 | -10.25971 | 0.20853  |
| C | -0.40897 | -2.41772 | -0.97377 | C  | -3.93595 | -10.15519 | -0.02292 |
| C | 0.34630  | -3.56879 | -1.03158 | C  | -3.31945 | -8.87297  | -0.22001 |
| C | -0.22983 | -4.87810 | -0.88424 | C  | -1.91430 | -8.81675  | -0.42202 |
| C | -2.68773 | -1.34942 | -0.61624 | C  | -1.08869 | -9.96977  | -0.44148 |
| C | -4.03040 | -1.51866 | -0.35611 | C  | -1.72948 | -11.23279 | -0.27263 |
| C | -4.63270 | -2.81753 | -0.21748 | C  | -3.09198 | -11.31625 | -0.07400 |
| C | -3.78787 | -3.96765 | -0.38507 | C  | -1.40689 | -7.48988  | -0.55301 |
| C | -5.99982 | -2.96462 | 0.07577  | C  | 0.00869  | -7.31906  | -0.74692 |
| C | -6.58814 | -4.23071 | 0.23769  | C  | 0.82738  | -8.49947  | -0.78923 |
| C | -7.98931 | -4.37183 | 0.52556  | C  | 0.30943  | -9.76849  | -0.63891 |
| C | -8.59700 | -5.59991 | 0.67716  | Cu | -2.49879 | -7.51270  | 1.41141  |
| C | -7.84859 | -6.80742 | 0.54706  | B  | -4.11114 | -7.54751  | -0.19304 |
| C | -6.46916 | -6.68631 | 0.24267  | Cu | -4.70299 | -6.50964  | 1.72757  |
| C | -5.80663 | -5.43051 | 0.09513  | B  | -4.29585 | -5.41757  | -0.23326 |
| C | -5.60453 | -7.80590 | 0.10836  | Cu | -2.68802 | -4.96876  | 1.30940  |
| C | -6.14719 | -9.12320 | 0.29372  | B  | -2.39662 | -6.30273  | -0.50705 |

|    |          |           |          |   |          |          |          |
|----|----------|-----------|----------|---|----------|----------|----------|
| C  | 0.56426  | -6.03867  | -0.91472 | H | -9.43306 | -8.25546 | 0.90867  |
| O  | -1.85192 | -3.58242  | 2.60110  | H | -9.66471 | -5.66104 | 0.90053  |
| C  | -2.35444 | -3.58329  | 4.02631  | H | -8.58059 | -3.45824 | 0.62701  |
| O  | -2.30046 | -4.84076  | 4.54431  | H | -6.61895 | -2.07084 | 0.18973  |
| Cu | -2.99154 | -6.19409  | 3.40082  | H | -4.67430 | -0.64340 | -0.23777 |
| H  | 1.64319  | -5.94145  | -1.06293 | H | -2.26831 | -0.34397 | -0.70107 |
| H  | -5.76361 | -11.24994 | 0.34521  | H | 0.07152  | -1.44148 | -1.07433 |
| H  | -3.56160 | -12.29423 | 0.05857  | H | 1.42677  | -3.50087 | -1.18218 |
| H  | 0.96979  | -10.63827 | -0.67112 | H | -1.67181 | -2.89595 | 4.56363  |
| H  | 1.90119  | -8.36689  | -0.94509 | H | -3.37500 | -3.15545 | 3.97985  |
| H  | -1.12212 | -12.14078 | -0.29803 | H | -1.97816 | -2.67648 | 2.24877  |
| H  | -7.97376 | -10.23355 | 0.68659  |   |          |          |          |

**\*CH<sub>2</sub>O + \*H<sub>2</sub>O**

|   |          |          |          |    |          |          |          |
|---|----------|----------|----------|----|----------|----------|----------|
| C | -1.66928 | -4.93483 | -0.68749 | C  | 1.90104  | 3.63423  | -1.34534 |
| C | -2.42808 | -3.72463 | -0.62905 | C  | 2.58469  | 2.41998  | -1.52513 |
| C | -1.73279 | -2.51313 | -0.83236 | C  | 4.00700  | 2.38843  | -1.75262 |
| C | -0.32254 | -2.44591 | -1.05184 | C  | 4.70282  | 1.21098  | -1.89519 |
| C | 0.41683  | -3.68216 | -1.09604 | C  | 4.03148  | -0.05149 | -1.83140 |
| C | -0.31170 | -4.90944 | -0.91599 | C  | 2.63502  | -0.03377 | -1.65585 |
| C | -3.83656 | -3.63878 | -0.39631 | C  | 1.88303  | 1.16438  | -1.48602 |
| C | -4.47100 | -2.41842 | -0.33972 | C  | 4.67222  | -1.33166 | -1.86601 |
| C | -3.76876 | -1.17279 | -0.50435 | C  | 3.94523  | -2.48978 | -1.71244 |
| C | -2.35848 | -1.23145 | -0.79375 | C  | 2.51884  | -2.48309 | -1.51049 |
| C | -4.42789 | 0.06341  | -0.38963 | C  | 1.84924  | -1.21046 | -1.49070 |
| C | -3.73449 | 1.28067  | -0.50269 | Cu | 1.47196  | -0.00077 | 0.46603  |
| C | -2.32161 | 1.30094  | -0.78862 | Cu | 0.23939  | -0.01547 | 2.66165  |
| C | -1.66157 | 2.56534  | -0.82605 | O  | 0.99438  | -0.15961 | 4.49783  |
| C | -2.32417 | 3.79574  | -0.62561 | C  | 2.13539  | 0.13183  | 4.86413  |
| C | -3.73504 | 3.74792  | -0.39594 | O  | 3.36331  | -0.21677 | 1.37569  |
| C | -4.40247 | 2.54530  | -0.34037 | B  | 0.33268  | -1.05682 | -1.24798 |
| C | -0.25483 | 2.46039  | -1.04758 | Cu | -0.70046 | -1.20018 | 0.76168  |
| C | 0.51767  | 3.67504  | -1.09981 | Cu | -0.67574 | 1.21632  | 0.77176  |
| C | -0.17695 | 4.92208  | -0.92100 | B  | 0.36276  | 1.05293  | -1.23790 |
| C | -1.53273 | 4.98447  | -0.68835 | C  | 1.80239  | -3.67867 | -1.32943 |

|   |          |          |          |   |         |          |          |
|---|----------|----------|----------|---|---------|----------|----------|
| B | -1.48626 | 0.02293  | -1.01117 | H | 0.41029 | 5.84303  | -0.97035 |
| H | 2.33990  | -4.63072 | -1.36344 | H | 2.46198 | 4.57217  | -1.39219 |
| H | -5.50168 | 0.07873  | -0.18289 | H | 4.53831 | 3.34306  | -1.79547 |
| H | -5.54657 | -2.37383 | -0.14834 | H | 5.78568 | 1.22716  | -2.04385 |
| H | -2.18493 | -5.88834 | -0.54680 | H | 5.75599 | -1.37764 | -2.00084 |
| H | 0.25102  | -5.84579 | -0.95952 | H | 4.45384 | -3.45746 | -1.73061 |
| H | -4.40615 | -4.56094 | -0.25508 | H | 2.42326 | -0.02482 | 5.92032  |
| H | -5.47940 | 2.53083  | -0.15204 | H | 2.88241 | 0.54819  | 4.16249  |
| H | -4.28044 | 4.68507  | -0.25756 | H | 3.92203 | -0.76070 | 0.78372  |
| H | -2.02227 | 5.95204  | -0.55026 | H | 3.30513 | -0.72706 | 2.20596  |

**\*CH<sub>2</sub>O**

|   |          |          |          |    |          |          |          |
|---|----------|----------|----------|----|----------|----------|----------|
| C | 1.79339  | -1.86442 | -0.77818 | C  | 10.78801 | -3.93844 | -2.03921 |
| C | 2.85488  | -0.90793 | -0.85106 | C  | 9.70842  | -4.83755 | -2.01448 |
| C | 4.14648  | -1.39787 | -1.13382 | C  | 8.35399  | -4.36103 | -1.90398 |
| C | 4.43960  | -2.78261 | -1.31587 | C  | 7.30314  | -5.32586 | -1.84570 |
| C | 3.35827  | -3.72672 | -1.19940 | C  | 7.52564  | -6.71812 | -1.89437 |
| C | 2.03940  | -3.20785 | -0.94723 | C  | 8.87793  | -7.16155 | -2.03911 |
| C | 5.30419  | -0.56582 | -1.20888 | C  | 9.91561  | -6.25936 | -2.09708 |
| C | 5.14049  | 0.84619  | -0.97994 | C  | 6.37842  | -7.56742 | -1.79872 |
| C | 3.81035  | 1.33608  | -0.72922 | C  | 5.11893  | -7.03788 | -1.63310 |
| C | 2.71651  | 0.50355  | -0.66443 | C  | 4.88106  | -5.62114 | -1.54162 |
| C | 6.24640  | 1.71262  | -1.00745 | C  | 6.01285  | -4.73989 | -1.67289 |
| C | 7.55197  | 1.23748  | -1.21759 | Cu | 7.28009  | -3.99653 | 0.04404  |
| C | 8.68418  | 2.12657  | -1.20812 | Cu | 7.29722  | -2.78264 | 2.18309  |
| C | 9.97469  | 1.68022  | -1.37967 | O  | 7.57142  | -2.67742 | 4.15667  |
| C | 10.25101 | 0.29140  | -1.58207 | C  | 7.29029  | -1.75311 | 4.92223  |
| C | 9.14828  | -0.58655 | -1.62943 | B  | 5.89925  | -3.19934 | -1.60645 |
| C | 7.79707  | -0.16117 | -1.45456 | Cu | 5.76840  | -2.11306 | 0.37821  |
| C | 11.55163 | -0.28220 | -1.74388 | Cu | 8.17395  | -1.72062 | 0.14325  |
| C | 11.71007 | -1.63959 | -1.90540 | B  | 7.98954  | -2.86123 | -1.81136 |
| C | 10.59699 | -2.55231 | -1.91675 | C  | 3.59026  | -5.10618 | -1.33182 |
| C | 9.27284  | -1.99850 | -1.79630 | B  | 6.67202  | -1.22107 | -1.50621 |

|   |          |          |          |   |          |          |          |
|---|----------|----------|----------|---|----------|----------|----------|
| H | 2.74794  | -5.79842 | -1.24745 | H | 12.71320 | -2.06056 | -2.01407 |
| H | 6.08923  | 2.78203  | -0.84065 | H | 11.80523 | -4.32966 | -2.13007 |
| H | 3.68514  | 2.41112  | -0.57511 | H | 10.94388 | -6.61804 | -2.19260 |
| H | 0.77805  | -1.51362 | -0.57680 | H | 9.07882  | -8.23450 | -2.09264 |
| H | 1.21651  | -3.92413 | -0.87773 | H | 6.51698  | -8.65033 | -1.85000 |
| H | 1.72455  | 0.91523  | -0.46150 | H | 4.25589  | -7.70393 | -1.55164 |
| H | 8.49383  | 3.19059  | -1.04428 | H | 7.50922  | -1.85525 | 6.00131  |
| H | 10.80852 | 2.38631  | -1.35442 | H | 6.82297  | -0.81947 | 4.55764  |
| H | 12.42456 | 0.37534  | -1.72786 |   |          |          |          |

**\*CH<sub>3</sub>O + \*H<sub>2</sub>O**

|   |          |          |          |    |          |          |          |
|---|----------|----------|----------|----|----------|----------|----------|
| C | -0.76594 | -5.11592 | -0.63167 | C  | 1.22042  | 3.94725  | -1.30649 |
| C | -1.73445 | -4.06885 | -0.64824 | C  | 2.12819  | 2.87750  | -1.40659 |
| C | -1.25542 | -2.74624 | -0.82750 | C  | 1.66867  | 1.51795  | -1.36945 |
| C | 0.12939  | -2.42297 | -0.95241 | C  | 2.63194  | 0.47336  | -1.45844 |
| C | 1.08149  | -3.50294 | -0.93637 | C  | 4.02045  | 0.70892  | -1.57645 |
| C | 0.57709  | -4.83894 | -0.77433 | C  | 4.44964  | 2.06989  | -1.63370 |
| C | -2.10996 | -1.61147 | -0.84674 | C  | 3.54126  | 3.10297  | -1.55026 |
| C | -3.52103 | -1.80561 | -0.66539 | C  | 4.87713  | -0.43425 | -1.58778 |
| C | -3.99494 | -3.15317 | -0.51603 | C  | 4.36219  | -1.70486 | -1.44876 |
| C | -3.14356 | -4.23855 | -0.50605 | C  | 2.95467  | -1.95422 | -1.28796 |
| C | -4.40079 | -0.70672 | -0.63598 | C  | 2.06860  | -0.82496 | -1.31174 |
| C | -3.93662 | 0.61806  | -0.73958 | Cu | 1.41141  | 0.35016  | 0.55001  |
| C | -4.83355 | 1.73736  | -0.66537 | Cu | 0.06778  | 0.16510  | 2.65405  |
| C | -4.39303 | 3.04318  | -0.72667 | O  | 1.39861  | 0.44990  | 3.98267  |
| C | -3.00656 | 3.34491  | -0.87270 | C  | 1.75160  | -0.59721 | 4.88315  |
| C | -2.11233 | 2.24859  | -0.97972 | B  | 0.54047  | -0.94142 | -1.13146 |
| C | -2.53869 | 0.89481  | -0.92209 | Cu | -0.57233 | -1.23948 | 0.80170  |
| C | -2.44166 | 4.65347  | -0.92724 | Cu | -1.01738 | 1.16113  | 0.73663  |
| C | -1.08153 | 4.83179  | -1.06628 | B  | 0.18459  | 1.12983  | -1.19547 |
| C | -0.15969 | 3.73241  | -1.15213 | C  | 2.45408  | -3.25688 | -1.10955 |
| C | -0.69853 | 2.39856  | -1.10043 | B  | -1.47173 | -0.21661 | -1.01664 |

|   |          |          |          |   |         |          |          |
|---|----------|----------|----------|---|---------|----------|----------|
| O | 2.93641  | 0.58933  | 1.91388  | H | 1.59847 | 4.97260  | -1.34054 |
| H | 3.15093  | -4.09925 | -1.10023 | H | 3.89118 | 4.13792  | -1.58220 |
| H | -5.47108 | -0.88528 | -0.50251 | H | 5.51674 | 2.28393  | -1.73083 |
| H | -5.07060 | -3.30547 | -0.39672 | H | 5.95485 | -0.28731 | -1.69256 |
| H | -1.10318 | -6.14756 | -0.50618 | H | 5.03533 | -2.56609 | -1.44612 |
| H | 1.30203  | -5.65688 | -0.76630 | H | 2.58484 | -0.26473 | 5.53184  |
| H | -3.54401 | -5.24763 | -0.38245 | H | 2.08064 | -1.51194 | 4.35448  |
| H | -5.89978 | 1.53032  | -0.54367 | H | 3.33662 | 1.47505  | 1.82564  |
| H | -5.10793 | 3.86651  | -0.65665 | H | 0.90468 | -0.87148 | 5.53833  |
| H | -3.10440 | 5.51931  | -0.85771 | H | 2.43625 | 0.57950  | 2.83189  |
| H | -0.67011 | 5.84358  | -1.10980 |   |         |          |          |

**\*CH<sub>3</sub>OH + \*H<sub>2</sub>O**

|   |          |          |          |    |          |          |          |
|---|----------|----------|----------|----|----------|----------|----------|
| C | 2.00176  | -0.67679 | -1.59741 | C  | -4.38978 | -0.88924 | -0.42398 |
| C | 2.50462  | 0.65340  | -1.69906 | C  | -3.47312 | -1.93992 | -0.60168 |
| C | 3.86715  | 0.95469  | -1.88411 | C  | -2.08798 | -1.66798 | -0.89107 |
| C | 4.76897  | -0.14752 | -2.03052 | C  | -1.19040 | -2.77377 | -0.98344 |
| C | 4.31871  | -1.44484 | -1.94496 | C  | -1.59550 | -4.11865 | -0.83293 |
| C | 2.93472  | -1.76616 | -1.70641 | C  | -2.98561 | -4.36053 | -0.59976 |
| C | 4.24394  | 2.33506  | -1.85343 | C  | -3.87744 | -3.31712 | -0.49327 |
| C | 3.30984  | 3.31744  | -1.61888 | C  | 0.16612  | -2.38146 | -1.19593 |
| C | 1.91819  | 3.02005  | -1.39477 | C  | 1.16099  | -3.41720 | -1.30923 |
| C | 1.50916  | 1.64290  | -1.45036 | C  | 0.72884  | -4.78324 | -1.17607 |
| C | 0.98946  | 4.03837  | -1.11934 | C  | -0.58471 | -5.12347 | -0.94203 |
| C | -0.36455 | 3.75636  | -0.87224 | Cu | -0.48192 | -1.35885 | 0.68907  |
| C | -1.31179 | 4.80545  | -0.60281 | B  | -1.52031 | -0.24131 | -1.04111 |
| C | -2.64549 | 4.55363  | -0.37056 | Cu | -0.96488 | 0.99970  | 0.82979  |
| C | -3.15822 | 3.21969  | -0.39937 | B  | 0.05614  | 1.17800  | -1.19551 |
| C | -2.24540 | 2.18100  | -0.68599 | Cu | 1.41324  | 0.26664  | 0.39161  |
| C | -0.85107 | 2.40057  | -0.90454 | O  | 3.20568  | 0.51355  | 1.45383  |
| C | -2.61317 | 0.80474  | -0.74608 | B  | 0.49229  | -0.87055 | -1.31998 |
| C | -3.98269 | 0.45552  | -0.46493 | C  | 2.50469  | -3.09725 | -1.56907 |
| C | -4.91016 | 1.52858  | -0.21931 | Cu | 0.29734  | -0.06654 | 2.59876  |
| C | -4.52264 | 2.84887  | -0.18350 | O  | 1.85135  | 0.01375  | 3.94346  |

|   |          |          |          |   |         |          |          |
|---|----------|----------|----------|---|---------|----------|----------|
| C | 2.41702  | -1.24183 | 4.41757  | H | 1.33150 | 5.07694  | -1.08931 |
| H | 3.23658  | -3.90528 | -1.65756 | H | 3.61952 | 4.36542  | -1.58386 |
| H | -5.43720 | -1.12312 | -0.21400 | H | 5.29409 | 2.59998  | -2.00205 |
| H | -4.93381 | -3.52263 | -0.30009 | H | 5.83105 | 0.05531  | -2.19133 |
| H | -0.86981 | -6.17367 | -0.83899 | H | 5.02525 | -2.27386 | -2.03988 |
| H | 1.48667  | -5.56669 | -1.26121 | H | 3.38842 | -1.04625 | 4.89248  |
| H | -3.33293 | -5.39207 | -0.49843 | H | 2.55161 | -1.87694 | 3.53370  |
| H | -5.95559 | 1.26523  | -0.03707 | H | 3.63926 | 1.35207  | 1.20210  |
| H | -5.25820 | 3.63157  | 0.01994  | H | 1.73002 | -1.72404 | 5.12693  |
| H | -3.33176 | 5.37848  | -0.16196 | H | 2.98241 | 0.59813  | 2.40990  |
| H | -0.93970 | 5.83327  | -0.57918 | H | 1.74640 | 0.61461  | 4.70585  |

**\*CH<sub>3</sub>OH**

|   |          |          |          |    |          |          |          |
|---|----------|----------|----------|----|----------|----------|----------|
| C | 2.31659  | -1.03648 | -0.80978 | B  | -1.12412 | -0.21684 | -1.41604 |
| C | 2.94422  | 0.23211  | -0.62386 | Cu | -1.06285 | 0.95940  | 0.53111  |
| C | 4.30952  | 0.38206  | -0.30489 | Cu | -0.52774 | -0.25620 | 2.60115  |
| C | 5.09244  | -0.81052 | -0.19695 | Cu | 1.16787  | -0.00211 | 0.84974  |
| C | 4.51986  | -2.05046 | -0.36765 | Cu | -0.75678 | -1.45924 | 0.46707  |
| C | 3.12042  | -2.22109 | -0.65791 | B  | 0.80800  | -1.07289 | -1.13826 |
| C | 4.79615  | 1.71495  | -0.12227 | C  | 0.30809  | -2.53377 | -1.21054 |
| C | 3.95088  | 2.79646  | -0.22265 | C  | 1.17787  | -3.67059 | -1.04675 |
| C | 2.54726  | 2.65729  | -0.50859 | C  | 0.59420  | -4.98219 | -1.15534 |
| C | 2.03672  | 1.32931  | -0.73589 | C  | -0.75107 | -5.17728 | -1.36972 |
| C | 1.69656  | 3.77419  | -0.56833 | C  | -1.64383 | -4.06667 | -1.49895 |
| C | 0.31976  | 3.64225  | -0.81619 | C  | -1.08104 | -2.77530 | -1.42878 |
| C | -0.55177 | 4.78777  | -0.84364 | C  | -3.05729 | -4.15472 | -1.70059 |
| C | -1.90718 | 4.68140  | -1.05684 | C  | -3.83052 | -3.02000 | -1.79201 |
| C | -2.51944 | 3.40582  | -1.26752 | C  | -3.27537 | -1.69590 | -1.68781 |
| C | -1.67288 | 2.27808  | -1.27677 | C  | -1.85055 | -1.57633 | -1.51797 |
| C | -0.26403 | 2.34803  | -1.05668 | C  | 2.54922  | -3.49800 | -0.79520 |
| C | -3.91608 | 3.17889  | -1.47786 | C  | -4.09142 | -0.55390 | -1.75466 |
| C | -4.40792 | 1.90473  | -1.64806 | B  | 0.55477  | 1.03619  | -1.07009 |
| C | -3.56181 | 0.74042  | -1.61893 | H  | -5.16911 | -0.67731 | -1.89425 |
| C | -2.14644 | 0.94245  | -1.44883 | H  | 2.11450  | 4.77097  | -0.40104 |

|   |          |          |          |   |          |          |          |
|---|----------|----------|----------|---|----------|----------|----------|
| H | -0.10357 | 5.77085  | -0.67636 | H | -1.15540 | -6.19067 | -1.43456 |
| H | -4.59369 | 4.03626  | -1.49397 | H | -3.51972 | -5.14230 | -1.77437 |
| H | -5.47982 | 1.75025  | -1.79805 | H | -4.91044 | -3.10858 | -1.93720 |
| H | -2.53536 | 5.57590  | -1.06000 | O | -0.90912 | -0.22911 | 4.58414  |
| H | 4.34074  | 3.80655  | -0.07053 | C | -0.29733 | 0.81364  | 5.39717  |
| H | 5.85398  | 1.86507  | 0.10811  | H | -0.77246 | 0.82427  | 6.38822  |
| H | 6.15757  | -0.72342 | 0.03214  | H | 0.78446  | 0.64330  | 5.49345  |
| H | 5.13200  | -2.95087 | -0.27055 | H | -0.48358 | 1.76409  | 4.88335  |
| H | 3.18484  | -4.38108 | -0.68590 | H | -0.77188 | -1.08368 | 5.03578  |
| H | 1.25808  | -5.84439 | -1.05036 |   |          |          |          |

**\*H<sub>2</sub>O + \*OH + \*CH<sub>4</sub>**

|   |          |          |          |    |          |          |          |
|---|----------|----------|----------|----|----------|----------|----------|
| C | -0.43727 | -5.06617 | -0.49250 | C  | 0.99969  | 4.09774  | -1.19001 |
| C | -1.46454 | -4.07745 | -0.46653 | C  | 1.96148  | 3.08201  | -1.33621 |
| C | -1.07273 | -2.72992 | -0.67554 | C  | 3.35487  | 3.38717  | -1.51688 |
| C | 0.28182  | -2.32978 | -0.88238 | C  | 4.31599  | 2.40779  | -1.64406 |
| C | 1.29278  | -3.35236 | -0.90938 | C  | 3.96526  | 1.02448  | -1.59518 |
| C | 0.87836  | -4.71271 | -0.70600 | C  | 2.59554  | 0.71027  | -1.43991 |
| C | -2.85190 | -4.32730 | -0.24891 | C  | 1.57863  | 1.69779  | -1.30923 |
| C | -3.76391 | -3.29277 | -0.21755 | C  | 4.88429  | -0.06749 | -1.64811 |
| C | -3.37625 | -1.92051 | -0.39082 | C  | 4.44693  | -1.36687 | -1.51065 |
| C | -1.98945 | -1.64560 | -0.64087 | C  | 3.06137  | -1.69699 | -1.31082 |
| C | -4.31548 | -0.87360 | -0.31810 | C  | 2.11182  | -0.62017 | -1.29031 |
| C | -3.93364 | 0.47583  | -0.44242 | Cu | 1.46314  | 0.50672  | 0.60069  |
| C | -2.56351 | 0.83213  | -0.68881 | Cu | 0.23874  | 0.25135  | 2.76312  |
| C | -2.21745 | 2.20828  | -0.75658 | O  | 1.56562  | 0.59924  | 4.07976  |
| C | -3.16642 | 3.25179  | -0.60056 | C  | 2.04552  | -2.59283 | 2.37091  |
| C | -4.52558 | 2.87119  | -0.39724 | B  | 0.60077  | -0.82805 | -1.06010 |
| C | -4.88844 | 1.54204  | -0.32473 | Cu | -0.39784 | -1.20889 | 0.93945  |
| C | -0.82107 | 2.44155  | -0.93784 | Cu | -0.98261 | 1.16727  | 0.89700  |
| C | -0.36055 | 3.80403  | -0.99139 | B  | 0.12630  | 1.22762  | -1.08389 |
| C | -1.33856 | 4.84817  | -0.85575 | C  | 2.64248  | -3.02693 | -1.12657 |
| C | -2.67985 | 4.59062  | -0.66546 | B  | -1.43800 | -0.21551 | -0.83217 |



|   |          |          |          |   |         |          |          |
|---|----------|----------|----------|---|---------|----------|----------|
| O | 3.02109  | 0.88533  | 1.90991  | H | 3.64706 | 4.44011  | -1.54419 |
| H | 3.38729  | -3.82702 | -1.13850 | H | 5.36617 | 2.68318  | -1.76829 |
| H | -5.36599 | -1.11304 | -0.13309 | H | 5.94829 | 0.14184  | -1.78268 |
| H | -4.82139 | -3.50605 | -0.04219 | H | 5.16744 | -2.18838 | -1.53785 |
| H | -0.70563 | -6.11365 | -0.33611 | H | 2.39969 | -1.94121 | 3.18114  |
| H | 1.65054  | -5.48612 | -0.72284 | H | 2.23657 | -2.11605 | 1.39919  |
| H | -3.18604 | -5.35693 | -0.10004 | H | 3.33516 | 1.80082  | 1.78090  |
| H | -5.93487 | 1.27465  | -0.15756 | H | 0.96482 | -2.77379 | 2.50278  |
| H | -5.28291 | 3.65167  | -0.29110 | H | 2.56304 | 0.86929  | 2.83823  |
| H | -3.38725 | 5.41653  | -0.56012 | H | 1.39587 | 1.45555  | 4.51277  |
| H | -0.98705 | 5.88214  | -0.90313 | H | 2.56678 | -3.56122 | 2.40741  |
| H | 1.31953  | 5.14276  | -1.22228 |   |         |          |          |

**\*H<sub>2</sub>O + \*OH**

|   |          |           |          |    |          |           |          |
|---|----------|-----------|----------|----|----------|-----------|----------|
| C | -0.65768 | -5.16549  | -0.75220 | C  | -3.02083 | -11.14390 | 0.27430  |
| C | -1.66189 | -4.16047  | -0.69012 | C  | -1.70672 | -10.73527 | -0.02324 |
| C | -1.38438 | -2.78102  | -0.82684 | C  | -0.62966 | -11.67986 | -0.12365 |
| C | -0.02963 | -2.40910  | -1.08432 | C  | 0.67156  | -11.29394 | -0.37188 |
| C | 0.96398  | -3.36128  | -1.16133 | C  | 1.01024  | -9.91965  | -0.54564 |
| C | 0.70109  | -4.76405  | -0.98603 | C  | -0.04941 | -8.97750  | -0.48266 |
| C | -2.95339 | -4.67277  | -0.37355 | C  | -1.39817 | -9.34825  | -0.23545 |
| C | -4.02608 | -3.73810  | -0.17596 | C  | 0.14577  | -7.57066  | -0.61289 |
| C | -3.73601 | -2.33935  | -0.34342 | C  | 1.48049  | -7.08975  | -0.85721 |
| C | -2.47613 | -1.87648  | -0.65630 | C  | 2.53819  | -8.05876  | -0.93770 |
| C | -5.31240 | -4.18410  | 0.17786  | C  | 2.32088  | -9.41191  | -0.78495 |
| C | -5.59237 | -5.54668  | 0.37492  | Cu | -0.82435 | -7.82664  | 1.37905  |
| C | -4.56776 | -6.54411  | 0.20432  | B  | -2.46252 | -8.23595  | -0.15722 |
| C | -4.92745 | -7.91383  | 0.38653  | Cu | -3.17504 | -7.30117  | 1.78084  |
| C | -6.23051 | -8.33595  | 0.75241  | B  | -3.11414 | -6.19628  | -0.19482 |
| C | -7.22294 | -7.32380  | 0.91282  | Cu | -1.57754 | -5.37036  | 1.30936  |
| C | -6.91233 | -5.99375  | 0.72693  | O  | -1.21399 | -3.82898  | 2.64448  |
| C | -6.43875 | -9.73708  | 0.91998  | B  | -1.08296 | -6.63176  | -0.51991 |
| C | -5.40429 | -10.63436 | 0.75361  | C  | 1.73209  | -5.71916  | -1.04110 |
| C | -4.07216 | -10.21796 | 0.41368  | Cu | -1.49550 | -6.69911  | 3.41513  |
| C | -3.84413 | -8.81535  | 0.21076  | O  | -1.12212 | -5.39976  | 4.74811  |

|   |          |           |          |   |          |          |          |
|---|----------|-----------|----------|---|----------|----------|----------|
| H | 2.75723  | -5.38760  | -1.22661 | H | -7.68880 | -5.23418 | 0.84953  |
| H | -3.22543 | -12.20748 | 0.42334  | H | -6.11225 | -3.45121 | 0.31411  |
| H | -0.86382 | -12.73838 | 0.01530  | H | -4.55510 | -1.62938 | -0.20242 |
| H | 3.15667  | -10.11273 | -0.84774 | H | -2.29614 | -0.80380 | -0.76116 |
| H | 3.55011  | -7.69131  | -1.12674 | H | 0.21399  | -1.35084 | -1.20541 |
| H | 1.46334  | -12.04452 | -0.43113 | H | 1.99661  | -3.05563 | -1.34814 |
| H | -5.58611 | -11.70336 | 0.89031  | H | -1.98231 | -3.22665 | 2.64203  |
| H | -7.43617 | -10.09403 | 1.18759  | H | -1.23048 | -4.30584 | 3.56182  |
| H | -8.23949 | -7.61658  | 1.18587  | H | -1.87697 | -5.30649 | 5.35684  |

**\*2H<sub>2</sub>O**

|   |          |           |          |    |          |           |          |
|---|----------|-----------|----------|----|----------|-----------|----------|
| C | -0.69747 | -5.15745  | -0.82170 | C  | -3.02077 | -11.12857 | 0.28510  |
| C | -1.70426 | -4.14946  | -0.76876 | C  | -1.70843 | -10.71373 | -0.00004 |
| C | -1.42995 | -2.77450  | -0.89459 | C  | -0.61598 | -11.65012 | -0.04447 |
| C | -0.07210 | -2.39490  | -1.14214 | C  | 0.68649  | -11.25749 | -0.25602 |
| C | 0.92458  | -3.34069  | -1.20864 | C  | 1.01738  | -9.88013  | -0.45235 |
| C | 0.66524  | -4.74668  | -1.03209 | C  | -0.04972 | -8.95453  | -0.45583 |
| C | -2.98896 | -4.66554  | -0.42761 | C  | -1.41162 | -9.32604  | -0.25042 |
| C | -4.06175 | -3.73173  | -0.21194 | C  | 0.13060  | -7.54805  | -0.62357 |
| C | -3.77351 | -2.32923  | -0.36860 | C  | 1.46867  | -7.05788  | -0.83943 |
| C | -2.51907 | -1.86733  | -0.69509 | C  | 2.54167  | -8.01646  | -0.85838 |
| C | -5.34373 | -4.17904  | 0.15237  | C  | 2.33301  | -9.36377  | -0.66705 |
| C | -5.62339 | -5.54194  | 0.34625  | Cu | -0.87688 | -7.79210  | 1.35438  |
| C | -4.59763 | -6.53796  | 0.16255  | B  | -2.48645 | -8.21969  | -0.24372 |
| C | -4.95073 | -7.90878  | 0.35150  | Cu | -3.20476 | -7.27717  | 1.73523  |
| C | -6.24132 | -8.33130  | 0.73917  | B  | -3.14431 | -6.19313  | -0.24948 |
| C | -7.23872 | -7.32134  | 0.90855  | Cu | -1.61611 | -5.39920  | 1.26238  |
| C | -6.93978 | -5.99163  | 0.71405  | O  | -1.10183 | -3.65814  | 2.31988  |
| C | -6.44379 | -9.73602  | 0.91343  | B  | -1.11690 | -6.62770  | -0.58645 |
| C | -5.40811 | -10.62653 | 0.74255  | C  | 1.70733  | -5.68927  | -1.04765 |
| C | -4.07675 | -10.20684 | 0.39014  | Cu | -1.54671 | -6.67328  | 3.40675  |
| C | -3.85736 | -8.80348  | 0.15259  | O  | -1.18687 | -5.56910  | 5.08011  |

|   |          |           |          |   |          |          |          |
|---|----------|-----------|----------|---|----------|----------|----------|
| H | 2.73299  | -5.34738  | -1.21351 | H | -6.14183 | -3.44573 | 0.29994  |
| H | -3.21895 | -12.18991 | 0.45963  | H | -4.58959 | -1.62009 | -0.20554 |
| H | -0.84481 | -12.70728 | 0.11574  | H | -2.33601 | -0.79349 | -0.78727 |
| H | 3.17723  | -10.05807 | -0.68036 | H | 0.16765  | -1.33443 | -1.25581 |
| H | 3.55525  | -7.64164  | -1.02456 | H | 1.95923  | -3.03142 | -1.37974 |
| H | 1.48823  | -12.00048 | -0.26914 | H | -1.69337 | -2.93006 | 2.04192  |
| H | -5.58128 | -11.69573 | 0.89226  | H | -1.27182 | -3.77722 | 3.27556  |
| H | -7.43726 | -10.09581 | 1.19366  | H | -1.86097 | -5.66304 | 5.78159  |
| H | -8.25007 | -7.61993  | 1.19648  | H | -0.33555 | -5.75951 | 5.52090  |
| H | -7.71686 | -5.23413  | 0.84729  |   |          |          |          |

**\*H<sub>2</sub>O**

|   |          |          |          |    |          |          |          |
|---|----------|----------|----------|----|----------|----------|----------|
| C | 1.99910  | -1.26850 | -1.01808 | C  | -4.30604 | 0.26981  | -1.13518 |
| C | 2.84801  | -0.12310 | -0.95032 | C  | -3.69014 | -0.99306 | -1.13693 |
| C | 4.24933  | -0.19993 | -0.81233 | C  | -2.25542 | -1.11165 | -1.16952 |
| C | 4.83240  | -1.50595 | -0.77489 | C  | -1.68796 | -2.42166 | -1.13875 |
| C | 4.04557  | -2.63327 | -0.83872 | C  | -2.45919 | -3.60091 | -1.08103 |
| C | 2.61101  | -2.57013 | -0.94023 | C  | -3.88196 | -3.45317 | -1.07923 |
| C | 4.96867  | 1.03373  | -0.73055 | C  | -4.46414 | -2.20623 | -1.10866 |
| C | 4.30818  | 2.24091  | -0.75760 | C  | -0.26093 | -2.41438 | -1.11288 |
| C | 2.87628  | 2.33522  | -0.86543 | C  | 0.42316  | -3.67910 | -1.02963 |
| C | 2.12883  | 1.10985  | -0.98173 | C  | -0.37720 | -4.87532 | -1.01466 |
| C | 2.22227  | 3.57914  | -0.86248 | C  | -1.75299 | -4.84435 | -1.03445 |
| C | 0.82291  | 3.67743  | -0.93777 | Cu | -0.91419 | -1.15609 | 0.64480  |
| C | 0.15699  | 4.95316  | -0.89899 | B  | -1.30421 | 0.10638  | -1.20834 |
| C | -1.21362 | 5.07279  | -0.93376 | Cu | -0.78869 | 1.28581  | 0.67485  |
| C | -2.05057 | 3.91532  | -1.01509 | B  | 0.59049  | 1.06637  | -1.12377 |
| C | -1.41086 | 2.66051  | -1.09153 | Cu | 1.26020  | -0.05001 | 0.74410  |
| C | 0.00656  | 2.49725  | -1.05686 | Cu | -0.22209 | 0.00186  | 2.70102  |
| C | -2.11589 | 1.42052  | -1.14924 | O  | -0.27100 | -0.00213 | 4.71598  |
| C | -3.55515 | 1.45748  | -1.12247 | B  | 0.47337  | -1.05481 | -1.15068 |
| C | -4.19359 | 2.74705  | -1.08264 | C  | 1.82603  | -3.73520 | -0.96703 |
| C | -3.48095 | 3.92309  | -1.02949 | H  | 2.31797  | -4.71049 | -0.91766 |

|   |          |          |          |   |          |          |          |
|---|----------|----------|----------|---|----------|----------|----------|
| H | -5.39775 | 0.33026  | -1.12111 | H | 0.77961  | 5.84896  | -0.82603 |
| H | -5.55335 | -2.11344 | -1.09567 | H | 2.81670  | 4.49345  | -0.77915 |
| H | -2.32400 | -5.77607 | -1.00637 | H | 4.87438  | 3.17306  | -0.68240 |
| H | 0.14438  | -5.83494 | -0.97160 | H | 6.05721  | 1.00498  | -0.63818 |
| H | -4.50623 | -4.34975 | -1.04525 | H | 5.91789  | -1.59815 | -0.68782 |
| H | -5.28645 | 2.77330  | -1.08174 | H | 4.50845  | -3.62295 | -0.80155 |
| H | -4.00411 | 4.88179  | -0.98759 | H | -0.66718 | -0.80875 | 5.10125  |
| H | -1.67957 | 6.06043  | -0.88895 | H | -0.78249 | 0.73785  | 5.09915  |

**b. Cu<sub>4</sub> cluster – C<sub>2</sub> pathway**

\*CO + \*COOH + \*H<sub>2</sub>O

|   |          |          |         |    |          |          |          |
|---|----------|----------|---------|----|----------|----------|----------|
| C | 4.23072  | -3.24113 | 0.83577 | C  | -0.82180 | -2.17857 | 1.34389  |
| C | 4.18464  | -1.81694 | 0.83893 | B  | 0.36084  | -1.18023 | 1.27694  |
| C | 2.91041  | -1.20887 | 1.00008 | Cu | -1.18656 | -0.81220 | -0.41012 |
| C | 1.70104  | -1.95124 | 1.12059 | Cu | -0.24077 | -0.50361 | -2.51305 |
| C | 1.77627  | -3.38791 | 1.07329 | C  | 0.69701  | -0.51538 | -4.07509 |
| C | 3.07600  | -3.98716 | 0.94726 | O  | 1.44235  | -0.52895 | -4.94729 |
| C | 5.30475  | -0.94875 | 0.68717 | C  | 0.61477  | -4.17754 | 1.15383  |
| C | 5.14282  | 0.42122  | 0.66749 | B  | -0.81165 | 0.54905  | 1.41590  |
| C | 3.85655  | 1.04936  | 0.79026 | Cu | 0.03526  | 1.43515  | -0.60353 |
| C | 2.71216  | 0.19694  | 0.96555 | O  | -1.14990 | 2.50140  | -1.89892 |
| C | 3.71589  | 2.44943  | 0.75416 | B  | 1.26673  | 0.74711  | 1.09650  |
| C | 2.46093  | 3.07437  | 0.88499 | Cu | 1.37635  | -0.62799 | -0.65323 |
| C | 1.27067  | 2.29401  | 1.07298 | O  | -2.87310 | 0.47535  | -2.41987 |
| C | 0.02924  | 2.96025  | 1.23721 | C  | -2.35845 | -0.61029 | -2.08131 |
| C | -0.09979 | 4.36756  | 1.15726 | O  | -3.02820 | -1.76924 | -2.36245 |
| C | 1.09542  | 5.12586  | 0.97488 | H  | 0.70955  | -5.26611 | 1.11502  |
| C | 2.32034  | 4.50385  | 0.85243 | H  | 4.60731  | 3.06813  | 0.61919  |
| C | -1.07424 | 2.07084  | 1.39609 | H  | 6.01604  | 1.06765  | 0.54613  |
| C | -2.39051 | 2.64503  | 1.43978 | H  | 5.19769  | -3.73891 | 0.72976  |
| C | -2.51002 | 4.07729  | 1.36568 | H  | 3.13268  | -5.07861 | 0.93069  |
| C | -1.41843 | 4.90755  | 1.23442 | H  | 6.30103  | -1.38426 | 0.57811  |
| C | -3.53524 | 1.83181  | 1.52312 | H  | 3.22388  | 5.10343  | 0.71526  |
| C | -3.44075 | 0.43290  | 1.52798 | H  | 1.02625  | 6.21533  | 0.92431  |
| C | -4.61271 | -0.39760 | 1.58811 | H  | -1.55385 | 5.99012  | 1.17354  |
| C | -4.55244 | -1.77466 | 1.57403 | H  | -3.51577 | 4.50342  | 1.40677  |
| C | -3.29853 | -2.45048 | 1.49678 | H  | -4.52222 | 2.30045  | 1.55990  |
| C | -2.13326 | -1.64582 | 1.45994 | H  | -5.58422 | 0.10051  | 1.63931  |
| C | -2.15417 | -0.21630 | 1.47850 | H  | -5.47153 | -2.36457 | 1.61285  |
| C | -3.11291 | -3.86397 | 1.44421 | H  | -3.99043 | -4.51415 | 1.48182  |
| C | -1.85148 | -4.41120 | 1.33591 | H  | -1.73254 | -5.49688 | 1.29190  |
| C | -0.66406 | -3.60430 | 1.26854 | H  | -1.57628 | 3.21109  | -1.37694 |

|   |          |         |          |   |          |          |          |
|---|----------|---------|----------|---|----------|----------|----------|
| H | -1.88592 | 1.84888 | -2.11056 | H | -3.88434 | -1.53577 | -2.79843 |
|---|----------|---------|----------|---|----------|----------|----------|

**\*2CO + \*2H<sub>2</sub>O**

|   |          |          |         |    |          |          |          |
|---|----------|----------|---------|----|----------|----------|----------|
| C | 1.26400  | -2.13614 | 1.24531 | C  | 4.95975  | 1.49561  | 1.02537  |
| C | 0.09313  | -2.94333 | 1.26805 | Cu | 1.26668  | 0.74776  | -0.54587 |
| C | 0.12272  | -4.35275 | 1.20944 | B  | -0.00184 | 1.20409  | 1.28251  |
| C | 1.40769  | -4.98146 | 1.16455 | Cu | -1.25509 | 0.68360  | -0.60852 |
| C | 2.56094  | -4.23201 | 1.14775 | O  | -2.79698 | 1.52471  | -1.75822 |
| C | 2.54236  | -2.79156 | 1.16840 | B  | 1.09729  | -0.60110 | 1.26335  |
| C | -1.11151 | -2.18460 | 1.22431 | Cu | -0.01156 | -1.44498 | -0.64173 |
| C | -2.36311 | -2.89385 | 1.15862 | C  | -0.95344 | -0.55104 | -3.70196 |
| C | -2.31819 | -4.33164 | 1.11934 | O  | 0.06601  | -3.17495 | -1.82278 |
| C | -1.13383 | -5.03314 | 1.14023 | C  | 3.73311  | -2.04647 | 1.11146  |
| C | -3.58470 | -2.19966 | 1.13681 | B  | -1.01445 | -0.64156 | 1.23762  |
| C | -3.63597 | -0.79613 | 1.18558 | Cu | 0.31072  | 0.18946  | -2.62994 |
| C | -2.42894 | -0.01647 | 1.25605 | C  | 1.92160  | 1.13010  | -2.65431 |
| C | -2.54372 | 1.40133  | 1.32201 | O  | 2.92917  | 1.71122  | -2.71334 |
| C | -3.77993 | 2.08093  | 1.28247 | O  | -1.82813 | -1.06419 | -4.24525 |
| C | -4.96481 | 1.28293  | 1.21375 | H  | 4.68951  | -2.57439 | 1.05990  |
| C | -4.89067 | -0.09125 | 1.17076 | H  | -0.09111 | 5.30705  | 1.12943  |
| C | -3.74195 | 3.51119  | 1.25161 | H  | 2.35759  | 5.38064  | 1.04229  |
| C | -2.54364 | 4.18563  | 1.22719 | H  | 5.90965  | 2.03260  | 0.96242  |
| C | -1.27510 | 3.50243  | 1.22740 | H  | 5.88643  | -0.43546 | 0.98925  |
| C | -1.28518 | 2.06493  | 1.28917 | H  | 4.55718  | 4.26226  | 0.98282  |
| C | -0.06476 | 4.21434  | 1.16754 | H  | -2.53411 | 5.27816  | 1.19039  |
| C | 1.17753  | 3.55884  | 1.14326 | H  | -4.68437 | 4.06499  | 1.22949  |
| C | 2.41385  | 4.28935  | 1.07721 | H  | -5.93736 | 1.78103  | 1.18448  |
| C | 3.64283  | 3.66641  | 1.04470 | H  | -5.80780 | -0.68394 | 1.11421  |
| C | 3.74579  | 2.24388  | 1.08065 | H  | -4.51878 | -2.76612 | 1.08175  |
| C | 2.53927  | 1.51176  | 1.17335 | H  | -3.26796 | -4.87036 | 1.06353  |
| C | 1.24869  | 2.12025  | 1.20424 | H  | -1.14142 | -6.12539 | 1.09510  |
| C | 2.48441  | 0.08601  | 1.18405 | H  | 1.46092  | -6.07277 | 1.12832  |
| C | 3.72629  | -0.64210 | 1.10462 | H  | 3.53366  | -4.72873 | 1.10014  |
| C | 4.94486  | 0.11771  | 1.03933 | H  | -3.54583 | 1.71984  | -1.15590 |

|   |          |          |          |   |          |          |          |
|---|----------|----------|----------|---|----------|----------|----------|
| H | -3.15612 | 0.89231  | -2.40972 | H | -0.09750 | -3.95339 | -1.24989 |
| H | -0.64550 | -3.19994 | -2.49076 |   |          |          |          |

**\*OCCOH + \*2H<sub>2</sub>O**

|   |          |          |         |    |          |          |          |
|---|----------|----------|---------|----|----------|----------|----------|
| C | 4.21352  | 2.45700  | 1.50369 | C  | 2.76931  | -2.24871 | 1.43229  |
| C | 2.86734  | 2.92371  | 1.42253 | C  | 1.37769  | -1.88656 | 1.39481  |
| C | 1.84640  | 1.94508  | 1.38095 | B  | 0.88287  | -0.42450 | 1.36591  |
| C | 2.09447  | 0.53863  | 1.40950 | Cu | 0.19047  | -1.52578 | -0.61546 |
| C | 3.46600  | 0.10286  | 1.45827 | Cu | 0.23384  | 0.09661  | -2.51534 |
| C | 4.49448  | 1.10806  | 1.51216 | C  | 3.77644  | -1.26745 | 1.46544  |
| C | 0.46506  | 2.25886  | 1.23553 | B  | -1.13243 | -0.93844 | 1.03501  |
| C | 0.08872  | 3.64640  | 1.14940 | Cu | -1.54600 | 0.28806  | -0.80908 |
| C | 1.13299  | 4.63070  | 1.23003 | O  | -2.95678 | 0.99575  | -2.16671 |
| C | 2.46304  | 4.29039  | 1.35887 | B  | -0.54666 | 1.08234  | 1.17712  |
| C | -1.26047 | 4.00968  | 1.00652 | Cu | 0.98962  | 1.01916  | -0.47962 |
| C | -2.28124 | 3.04364  | 0.93565 | O  | 1.51356  | -2.59571 | -1.82236 |
| C | -3.65418 | 3.43136  | 0.75873 | H  | 4.82388  | -1.57999 | 1.50104  |
| C | -4.68063 | 2.51344  | 0.67440 | H  | -1.52497 | 5.06848  | 0.93705  |
| C | -4.41879 | 1.11448  | 0.76332 | H  | 0.84453  | 5.68383  | 1.17772  |
| C | -3.06665 | 0.71853  | 0.94787 | H  | 5.02613  | 3.18677  | 1.54274  |
| C | -1.98433 | 1.63928  | 1.03205 | H  | 5.53256  | 0.76876  | 1.56183  |
| C | -5.39067 | 0.08134  | 0.62669 | H  | 3.22673  | 5.07112  | 1.40132  |
| C | -5.02082 | -1.24740 | 0.65089 | H  | -3.87492 | 4.49921  | 0.68071  |
| C | -3.65270 | -1.66123 | 0.79367 | H  | -5.70901 | 2.85301  | 0.52696  |
| C | -2.65473 | -0.63802 | 0.93714 | H  | -6.43945 | 0.35700  | 0.49040  |
| C | -3.29564 | -3.02342 | 0.79713 | H  | -5.78171 | -2.02499 | 0.54427  |
| C | -1.95899 | -3.43998 | 0.94460 | H  | -4.07920 | -3.77839 | 0.68761  |
| C | -0.90286 | -2.47737 | 1.08935 | H  | -2.40520 | -5.56708 | 0.86791  |
| C | 0.42204  | -2.93984 | 1.28644 | H  | -0.06364 | -6.32113 | 1.11157  |
| C | 0.76485  | -4.31470 | 1.26211 | H  | 2.45380  | -5.69072 | 1.32251  |
| C | -0.29823 | -5.25367 | 1.11659 | H  | 4.16410  | -3.91706 | 1.45197  |
| C | -1.60343 | -4.83145 | 0.97377 | H  | -2.55450 | 1.58208  | -2.83599 |
| C | 2.15198  | -4.64028 | 1.34006 | H  | -3.59641 | 1.56368  | -1.68788 |
| C | 3.10514  | -3.64780 | 1.41277 | H  | 1.95949  | -3.26019 | -1.25798 |

|   |         |          |          |   |         |          |          |
|---|---------|----------|----------|---|---------|----------|----------|
| H | 2.21250 | -1.90488 | -1.99876 | O | 3.11635 | -0.34380 | -2.00770 |
| C | 2.13622 | 0.68647  | -2.14817 | O | 2.34479 | 2.71694  | -3.60800 |
| C | 2.32618 | 1.73249  | -2.94353 | H | 3.35677 | -0.37799 | -1.05655 |

**\*CCO + \*3H<sub>2</sub>O**

|   |          |          |          |    |          |          |          |
|---|----------|----------|----------|----|----------|----------|----------|
| C | 2.31960  | -0.04875 | -1.16434 | C  | 2.15135  | -2.91819 | -1.31190 |
| C | 2.49094  | 1.35397  | -1.10036 | C  | 2.04385  | -4.35609 | -1.37716 |
| C | 3.74483  | 1.98814  | -1.05968 | C  | 0.83444  | -5.00558 | -1.36749 |
| C | 4.90182  | 1.15086  | -1.05836 | Cu | 0.16626  | -1.47644 | 0.72178  |
| C | 4.77717  | -0.22290 | -1.13941 | C  | 0.14251  | 0.12462  | 2.10484  |
| C | 3.49222  | -0.87218 | -1.20873 | O  | -0.15352 | -3.31754 | 1.76740  |
| C | 3.76698  | 3.42467  | -1.06832 | B  | 0.88624  | -0.61666 | -1.20240 |
| C | 2.60527  | 4.15242  | -1.14673 | Cu | 0.52256  | 1.56270  | 0.80628  |
| C | 1.30427  | 3.52968  | -1.19182 | O  | 3.96993  | -0.46008 | 1.84314  |
| C | 1.25204  | 2.07740  | -1.11700 | C  | 3.39432  | -2.27738 | -1.29099 |
| C | 0.13078  | 4.28184  | -1.30692 | B  | -1.18644 | -0.48980 | -1.01636 |
| C | -1.13989 | 3.66345  | -1.29785 | Cu | -1.64005 | 0.22005  | 1.02814  |
| C | -2.34765 | 4.44401  | -1.27710 | O  | -3.25834 | 0.87442  | 2.19619  |
| C | -3.59041 | 3.86621  | -1.13529 | B  | -0.05966 | 1.27267  | -1.24155 |
| C | -3.72538 | 2.44936  | -1.00387 | Cu | 2.03643  | -0.16736 | 1.83754  |
| C | -2.55450 | 1.67723  | -1.07080 | C  | -0.30392 | 0.14390  | 3.34084  |
| C | -1.26292 | 2.23472  | -1.24314 | O  | -0.74271 | 0.15233  | 4.44671  |
| C | -2.54347 | 0.25268  | -0.91340 | H  | 4.30932  | -2.87574 | -1.32513 |
| C | -3.81947 | -0.43113 | -0.81819 | H  | -4.86735 | -2.31336 | -0.73992 |
| C | -5.00543 | 0.38426  | -0.70959 | H  | -3.80374 | -4.51934 | -0.92790 |
| C | -4.96505 | 1.75591  | -0.78739 | H  | 0.79715  | -6.09782 | -1.39790 |
| C | -3.89223 | -1.82775 | -0.83596 | H  | 2.97140  | -4.93342 | -1.42218 |
| C | -2.73654 | -2.62392 | -0.99098 | H  | -1.79820 | -5.94395 | -1.18451 |
| C | -1.44307 | -2.01959 | -1.11308 | H  | -5.96257 | -0.12550 | -0.57180 |
| C | -0.31693 | -2.86950 | -1.26949 | H  | -5.88672 | 2.33726  | -0.70005 |
| C | -0.39905 | -4.27322 | -1.29421 | H  | -4.48710 | 4.49098  | -1.10534 |
| C | -1.70052 | -4.85525 | -1.17378 | H  | -2.25652 | 5.53108  | -1.35292 |
| C | -2.81672 | -4.05992 | -1.02814 | H  | 0.19545  | 5.37264  | -1.35209 |
| C | 0.92399  | -2.15424 | -1.26318 | H  | 2.64762  | 5.24437  | -1.18230 |



|   |          |          |          |   |          |          |         |
|---|----------|----------|----------|---|----------|----------|---------|
| H | 4.73300  | 3.93543  | -1.03387 | H | 4.45321  | 0.05536  | 2.51800 |
| H | 5.89292  | 1.60937  | -1.01193 | H | 4.39020  | -0.22436 | 0.97924 |
| H | 5.67226  | -0.85069 | -1.16078 | H | -0.79531 | -3.17549 | 2.48899 |
| H | -3.97015 | 1.20344  | 1.60862  | H | -0.60607 | -3.92415 | 1.14475 |
| H | -3.01439 | 1.63882  | 2.75215  |   |          |          |         |

**\*CHCO + \*3H<sub>2</sub>O**

|   |          |          |          |    |          |          |          |
|---|----------|----------|----------|----|----------|----------|----------|
| C | 1.49504  | -4.76694 | -1.24211 | C  | 0.85029  | 2.28806  | -0.83979 |
| C | 0.20711  | -4.23441 | -0.93161 | C  | 4.54052  | 1.96034  | -1.47964 |
| C | 0.07989  | -2.82505 | -0.89208 | C  | 4.62000  | 0.59287  | -1.63195 |
| C | 1.16066  | -1.94137 | -1.15448 | C  | 3.46938  | -0.26474 | -1.51518 |
| C | 2.44861  | -2.50077 | -1.47443 | C  | 2.19722  | 0.35944  | -1.21211 |
| C | 2.56334  | -3.93496 | -1.50943 | B  | 0.87475  | -0.42811 | -1.10002 |
| C | -0.97221 | -5.00493 | -0.70355 | Cu | -0.44191 | -1.14297 | 1.19063  |
| C | -2.19504 | -4.38691 | -0.54432 | Cu | 2.10090  | -0.43077 | 0.84417  |
| C | -2.34675 | -2.95681 | -0.58131 | O  | 3.18489  | -2.14724 | 1.49888  |
| C | -1.14973 | -2.15814 | -0.65345 | C  | 3.56301  | -1.66095 | -1.68420 |
| C | -3.62266 | -2.36503 | -0.65855 | Cu | 0.53098  | 1.37504  | 1.18427  |
| C | -3.78725 | -0.98423 | -0.88559 | B  | -0.34489 | 1.27839  | -0.82455 |
| C | -2.64754 | -0.11513 | -0.96907 | B  | -1.16665 | -0.58934 | -0.75163 |
| C | -2.87012 | 1.27457  | -1.17195 | Cu | -1.81083 | 0.85841  | 0.83409  |
| C | -4.16685 | 1.85324  | -1.28395 | C  | 1.73320  | 0.45539  | 3.45705  |
| C | -5.27593 | 0.96055  | -1.24006 | O  | 1.29310  | -0.13826 | 4.39240  |
| C | -5.08911 | -0.39541 | -1.04810 | C  | 2.12302  | 1.03668  | 2.35124  |
| C | -1.68225 | 2.04591  | -1.07845 | O  | 0.00091  | -2.29792 | 2.80427  |
| C | -1.78286 | 3.47591  | -1.10711 | O  | -3.26617 | 1.52952  | 2.11031  |
| C | -3.09233 | 4.04726  | -1.26681 | H  | 4.53256  | -2.10655 | -1.92354 |
| C | -4.23538 | 3.27433  | -1.35196 | H  | -4.50908 | -3.00345 | -0.60095 |
| C | -0.62891 | 4.27760  | -0.98523 | H  | -3.09900 | -4.99149 | -0.42954 |
| C | 0.66019  | 3.71780  | -0.88975 | H  | 1.62524  | -5.85179 | -1.27986 |
| C | 1.83545  | 4.54395  | -0.95350 | H  | 3.53941  | -4.36419 | -1.75207 |
| C | 3.10102  | 4.01404  | -1.09587 | H  | -0.90301 | -6.09594 | -0.69796 |
| C | 3.29372  | 2.60396  | -1.20603 | H  | -5.95753 | -1.05817 | -0.99876 |
| C | 2.15312  | 1.78144  | -1.07223 | H  | -6.28733 | 1.36459  | -1.33572 |

|   |          |         |          |   |          |          |         |
|---|----------|---------|----------|---|----------|----------|---------|
| H | -5.21277 | 3.75378 | -1.45187 | H | -3.99861 | 1.90646  | 1.58175 |
| H | -3.17362 | 5.13705 | -1.30351 | H | -2.95251 | 2.27179  | 2.66186 |
| H | -0.73203 | 5.36607 | -1.01857 | H | 4.06940  | -1.88755 | 1.81996 |
| H | 1.69917  | 5.62868 | -0.93134 | H | 3.36240  | -2.68751 | 0.70024 |
| H | 3.96829  | 4.67581 | -1.16703 | H | 0.40239  | -1.77642 | 3.53258 |
| H | 5.43944  | 2.57420 | -1.58244 | H | -0.80044 | -2.69959 | 3.19237 |
| H | 5.58346  | 0.12562 | -1.85317 | H | 2.98328  | 1.70858  | 2.31727 |

**\*CHCHO + \*3H<sub>2</sub>O**

|   |          |          |          |    |          |          |          |
|---|----------|----------|----------|----|----------|----------|----------|
| C | 2.43473  | -0.08122 | -0.86180 | C  | -0.11053 | -4.40328 | -1.21946 |
| C | 2.55998  | 1.31648  | -1.13509 | C  | -0.07670 | -2.99646 | -1.12406 |
| C | 3.80038  | 1.97774  | -1.19873 | C  | -1.24316 | -2.18573 | -1.05914 |
| C | 4.98506  | 1.18906  | -1.02013 | C  | 1.12898  | -2.24896 | -0.98666 |
| C | 4.90703  | -0.17659 | -0.87127 | C  | 2.37206  | -2.96622 | -0.96854 |
| C | 3.64566  | -0.87417 | -0.84856 | C  | 2.32664  | -4.39949 | -1.08076 |
| C | 1.31477  | 1.96969  | -1.32923 | C  | 1.14242  | -5.09193 | -1.20538 |
| C | 1.31962  | 3.39682  | -1.51834 | Cu | 0.01596  | -1.57760 | 0.80363  |
| C | 2.59271  | 4.05762  | -1.60168 | O  | -0.20760 | -2.57352 | 2.56975  |
| C | 3.78496  | 3.38403  | -1.45287 | B  | 1.00563  | -0.69554 | -0.86593 |
| C | 0.11083  | 4.12447  | -1.57008 | Cu | 1.72536  | 0.24789  | 1.15642  |
| C | -1.12207 | 3.49269  | -1.36023 | C  | 0.58469  | 1.36508  | 2.51729  |
| C | -1.19002 | 2.05769  | -1.12956 | C  | -0.14513 | 0.57276  | 3.38477  |
| C | -2.48081 | 1.46691  | -0.95548 | O  | -1.18616 | -0.18714 | 3.09446  |
| C | -3.67511 | 2.19350  | -1.01622 | C  | 3.59428  | -2.27410 | -0.87320 |
| C | -3.58122 | 3.61127  | -1.21727 | B  | -1.04311 | -0.65128 | -0.89609 |
| C | -2.36233 | 4.22422  | -1.38004 | Cu | -1.89516 | -0.00605 | 1.21698  |
| C | -4.90695 | 1.45993  | -0.92725 | O  | -3.76602 | 0.67578  | 2.10007  |
| C | -4.90867 | 0.08464  | -0.87372 | B  | 0.03122  | 1.12214  | -1.24359 |
| C | -3.69031 | -0.68482 | -0.87099 | Cu | -0.13936 | 1.81086  | 0.76302  |
| C | -2.43270 | 0.04242  | -0.79880 | O  | 3.64863  | 0.55543  | 2.07981  |
| C | -3.70989 | -2.08037 | -0.98461 | H  | 4.52899  | -2.84206 | -0.85817 |
| C | -2.52107 | -2.83368 | -1.07759 | H  | -4.67255 | -2.59820 | -1.02016 |
| C | -2.54768 | -4.26654 | -1.20218 | H  | -3.52347 | -4.75915 | -1.22815 |
| C | -1.39794 | -5.02238 | -1.27540 | H  | 1.14895  | -6.18226 | -1.28066 |

|   |          |          |          |   |          |          |          |
|---|----------|----------|----------|---|----------|----------|----------|
| H | 3.27469  | -4.94366 | -1.06093 | H | 5.82071  | -0.77098 | -0.78919 |
| H | -1.46074 | -6.11029 | -1.35949 | H | -4.36476 | 1.01676  | 1.40358  |
| H | -5.85639 | -0.45956 | -0.86218 | H | -3.57437 | 1.44741  | 2.66554  |
| H | -5.85158 | 2.00911  | -0.94668 | H | 3.60815  | 1.40971  | 2.55068  |
| H | -4.50105 | 4.20029  | -1.25832 | H | 4.32226  | 0.68569  | 1.37931  |
| H | -2.31367 | 5.30321  | -1.54970 | H | -0.66810 | -1.81062 | 3.03906  |
| H | 0.14116  | 5.20487  | -1.73510 | H | -0.87944 | -3.27790 | 2.49478  |
| H | 2.59788  | 5.13664  | -1.77886 | H | 1.33671  | 1.97434  | 3.04385  |
| H | 4.73358  | 3.92266  | -1.52148 | H | 0.12533  | 0.54650  | 4.45774  |
| H | 5.95897  | 1.68435  | -1.04102 |   |          |          |          |

**\*CH<sub>2</sub>CHO + \*3H<sub>2</sub>O**

|   |          |          |          |    |          |          |          |
|---|----------|----------|----------|----|----------|----------|----------|
| C | 0.20704  | -5.14593 | -0.61837 | C  | 2.28957  | 3.08812  | -1.19921 |
| C | -0.82980 | -4.21040 | -0.91067 | C  | 1.97097  | 1.68891  | -1.13005 |
| C | -0.49406 | -2.83414 | -0.87297 | C  | 3.03850  | 0.74853  | -1.14078 |
| C | 0.80725  | -2.35945 | -0.56602 | C  | 4.41109  | 1.12391  | -1.20982 |
| C | 1.86621  | -3.32783 | -0.43451 | C  | 4.69309  | 2.51490  | -1.32798 |
| C | 1.49968  | -4.71825 | -0.39841 | C  | 3.67534  | 3.44998  | -1.32371 |
| C | -1.41873 | -1.80403 | -1.17913 | C  | 5.37357  | 0.08503  | -1.06451 |
| C | -2.76794 | -2.16667 | -1.52483 | C  | 4.98303  | -1.22021 | -0.83026 |
| C | -3.09150 | -3.56790 | -1.57381 | C  | 3.60333  | -1.60454 | -0.71219 |
| C | -2.16753 | -4.54857 | -1.27401 | C  | 2.61147  | -0.58093 | -0.87613 |
| C | -3.75347 | -1.17446 | -1.72260 | B  | 1.07324  | -0.81550 | -0.66762 |
| C | -3.47304 | 0.18895  | -1.51853 | B  | -0.92375 | -0.34498 | -1.09464 |
| C | -4.48319 | 1.20610  | -1.64776 | Cu | -2.08846 | -0.22383 | 0.78196  |
| C | -4.20117 | 2.54811  | -1.51000 | Cu | -0.28959 | 1.59956  | 1.12901  |
| C | -2.86925 | 3.00459  | -1.25623 | B  | 0.52530  | 1.14195  | -0.89784 |
| C | -1.86558 | 2.02608  | -1.10026 | Cu | 1.91132  | 0.60876  | 0.83756  |
| C | -2.12808 | 0.62140  | -1.17988 | O  | 3.36795  | 1.31020  | 2.08960  |
| C | -2.46043 | 4.37147  | -1.20619 | C  | 3.21957  | -2.93681 | -0.45625 |
| C | -1.12545 | 4.70515  | -1.10904 | Cu | 0.29680  | -1.15992 | 1.26886  |
| C | -0.08787 | 3.71304  | -1.03647 | O  | -0.62803 | -1.80227 | 2.94435  |
| C | -0.49132 | 2.33114  | -0.93761 | C  | -1.56431 | 2.60577  | 2.43143  |
| C | 1.27221  | 4.06257  | -1.13593 | C  | -1.44390 | 1.35427  | 3.02542  |

|   |          |          |          |   |          |          |          |
|---|----------|----------|----------|---|----------|----------|----------|
| O | -2.20428 | 0.28985  | 2.77436  | H | 3.92044  | 4.51339  | -1.39336 |
| O | -3.26441 | -1.98857 | 1.46153  | H | 5.73409  | 2.84212  | -1.39431 |
| H | 3.99409  | -3.70102 | -0.34395 | H | 6.43624  | 0.33512  | -1.12026 |
| H | -4.77165 | -1.47698 | -1.98186 | H | 5.74212  | -1.99801 | -0.71003 |
| H | -4.11240 | -3.84812 | -1.84705 | H | -3.69290 | -2.38959 | 0.67963  |
| H | -0.02664 | -6.21388 | -0.61130 | H | -3.99907 | -1.68042 | 2.02431  |
| H | 2.29439  | -5.45145 | -0.23501 | H | 4.21206  | 1.36363  | 1.59725  |
| H | -2.45404 | -5.60262 | -1.31824 | H | 3.55094  | 0.70883  | 2.83667  |
| H | -5.50293 | 0.88631  | -1.87818 | H | -1.30199 | -1.04229 | 3.06706  |
| H | -4.99875 | 3.28699  | -1.62431 | H | -1.18639 | -2.57853 | 2.73823  |
| H | -3.21672 | 5.15639  | -1.28943 | H | -0.70487 | 1.23149  | 3.83512  |
| H | -0.82547 | 5.75640  | -1.12978 | H | -2.42251 | 2.83526  | 1.78979  |
| H | 1.54584  | 5.11968  | -1.19953 | H | -1.00918 | 3.43915  | 2.86849  |

**\*CH<sub>2</sub>CH<sub>2</sub>O + \*3H<sub>2</sub>O**

|   |          |          |          |    |          |          |          |
|---|----------|----------|----------|----|----------|----------|----------|
| C | 2.40061  | -1.06601 | -0.92286 | C  | -4.11424 | 2.15840  | -2.00205 |
| C | 3.10091  | 0.16333  | -0.86276 | C  | -3.54225 | 3.41178  | -2.01318 |
| C | 4.50512  | 0.25412  | -0.82331 | C  | -3.97786 | -0.30182 | -1.69614 |
| C | 5.24576  | -0.96992 | -0.82961 | C  | -3.24819 | -1.46284 | -1.39725 |
| C | 4.59508  | -2.18228 | -0.86717 | C  | -1.83385 | -1.39630 | -1.09313 |
| C | 3.16029  | -2.28130 | -0.90607 | C  | -1.12974 | -2.62867 | -0.97218 |
| C | 5.08510  | 1.56263  | -0.77962 | C  | -1.74293 | -3.88547 | -1.05387 |
| C | 4.28964  | 2.68404  | -0.81268 | C  | -3.16414 | -3.92013 | -1.24545 |
| C | 2.85336  | 2.60658  | -0.87952 | C  | -3.87659 | -2.75847 | -1.41559 |
| C | 2.24069  | 1.30070  | -0.83441 | C  | 0.28661  | -2.45325 | -0.87325 |
| C | 2.07538  | 3.76306  | -1.05462 | C  | 1.11903  | -3.64270 | -0.88192 |
| C | 0.68527  | 3.69466  | -1.24711 | C  | 0.46367  | -4.92575 | -0.91320 |
| C | -0.09134 | 4.87206  | -1.52874 | C  | -0.90192 | -5.04671 | -0.99360 |
| C | -1.44602 | 4.82306  | -1.76607 | B  | 0.85671  | -1.00962 | -0.94815 |
| C | -2.14768 | 3.57624  | -1.75337 | Cu | 0.62668  | -1.78622 | 1.05186  |
| C | -1.39595 | 2.40692  | -1.49515 | O  | 0.77930  | -1.74247 | 2.95788  |
| C | 0.00060  | 2.42478  | -1.21185 | C  | 2.51769  | -3.53710 | -0.90432 |
| C | -1.95315 | 1.10070  | -1.47837 | B  | -1.01365 | -0.08490 | -1.16105 |
| C | -3.35684 | 0.96742  | -1.72625 | Cu | -1.61484 | -0.34166 | 0.87747  |

|    |          |          |          |   |          |          |          |
|----|----------|----------|----------|---|----------|----------|----------|
| O  | -3.84340 | -0.20581 | 1.35837  | H | 0.43003  | 5.83242  | -1.54761 |
| Cu | -0.73023 | 2.01363  | 0.71438  | H | 2.56973  | 4.73775  | -1.08909 |
| C  | -1.11539 | 0.94636  | 3.50355  | H | 4.74475  | 3.67790  | -0.80752 |
| O  | -1.41410 | -0.37662 | 2.95071  | H | 6.17273  | 1.65944  | -0.73651 |
| B  | 0.69939  | 1.05986  | -0.93288 | H | 6.33741  | -0.92968 | -0.80000 |
| Cu | 1.35935  | 0.76334  | 1.06581  | H | 5.17159  | -3.11119 | -0.86104 |
| O  | 2.22808  | 0.33984  | 2.82621  | H | -4.22671 | -0.06054 | 0.46615  |
| C  | -1.46670 | 2.06429  | 2.53952  | H | -3.92634 | 0.65645  | 1.80700  |
| H  | 3.12213  | -4.44852 | -0.90417 | H | 3.17054  | 0.12138  | 2.69632  |
| H  | -5.04574 | -0.38284 | -1.91794 | H | 1.75636  | -0.56335 | 3.04162  |
| H  | -4.95315 | -2.79990 | -1.60111 | H | -0.61411 | -0.97546 | 3.13878  |
| H  | -1.36497 | -6.03568 | -1.03501 | H | 0.99182  | -2.58660 | 3.38992  |
| H  | 1.09298  | -5.81947 | -0.89264 | H | -0.04294 | 0.97845  | 3.74999  |
| H  | -3.66927 | -4.88837 | -1.28774 | H | -2.56500 | 2.18203  | 2.46913  |
| H  | -5.18322 | 2.04652  | -2.20225 | H | -1.08164 | 3.01024  | 2.96687  |
| H  | -4.15070 | 4.29426  | -2.22480 | H | -1.68970 | 1.02401  | 4.44524  |
| H  | -2.00251 | 5.74114  | -1.96978 |   |          |          |          |

**\*CH<sub>3</sub>CH<sub>2</sub>OH + \*OH + \*2H<sub>2</sub>O**

|   |          |          |          |   |          |          |          |
|---|----------|----------|----------|---|----------|----------|----------|
| C | 1.83024  | -1.79228 | -1.07784 | C | 0.46455  | 5.14861  | -1.34693 |
| C | 2.94068  | -0.92892 | -0.86536 | C | 1.74067  | 4.66876  | -1.12186 |
| C | 4.27984  | -1.37992 | -0.79450 | C | -2.00769 | 4.64835  | -1.60680 |
| C | 4.50495  | -2.78247 | -0.92961 | C | -3.01910 | 3.70759  | -1.61827 |
| C | 3.44889  | -3.65143 | -1.10978 | C | -2.77055 | 2.30279  | -1.44386 |
| C | 2.08264  | -3.20566 | -1.17055 | C | -1.40592 | 1.88569  | -1.26819 |
| C | 2.58240  | 0.43920  | -0.72031 | C | -3.82030 | 1.35940  | -1.46438 |
| C | 3.63341  | 1.42792  | -0.67056 | C | -3.59079 | -0.02013 | -1.32019 |
| C | 4.98573  | 0.95040  | -0.56194 | C | -4.65210 | -0.98724 | -1.41108 |
| C | 5.29700  | -0.39550 | -0.60540 | C | -4.41306 | -2.34779 | -1.37367 |
| C | 3.33491  | 2.80003  | -0.74711 | C | -3.08266 | -2.86310 | -1.26993 |
| C | 2.01991  | 3.27122  | -0.94543 | C | -2.03666 | -1.93083 | -1.13715 |
| C | 0.91411  | 2.35515  | -1.01381 | C | -2.25259 | -0.52574 | -1.09464 |
| C | -0.38366 | 2.87407  | -1.27184 | C | -0.65080 | -2.29259 | -1.08996 |
| C | -0.64867 | 4.26356  | -1.41973 | C | -0.32064 | -3.70592 | -1.22124 |

|    |          |          |          |   |          |          |          |
|----|----------|----------|----------|---|----------|----------|----------|
| C  | -1.40990 | -4.64267 | -1.31229 | H | -5.24699 | -3.04972 | -1.45443 |
| C  | -2.72899 | -4.24852 | -1.33349 | H | -4.05480 | 4.02897  | -1.75896 |
| B  | 0.41457  | -1.16471 | -1.14888 | H | -2.24453 | 5.70801  | -1.73479 |
| Cu | 0.15500  | -1.76094 | 0.82582  | H | 0.29744  | 6.22232  | -1.46779 |
| O  | 0.77766  | -1.23231 | 2.56455  | H | 2.58088  | 5.36698  | -1.07270 |
| Cu | 1.75448  | 0.17128  | 1.26058  | H | 4.15391  | 3.52362  | -0.69939 |
| Cu | -0.26230 | 1.46475  | 0.70253  | H | 5.78431  | 1.69029  | -0.46285 |
| Cu | -1.97700 | -0.24472 | 1.00328  | H | 6.33793  | -0.71901 | -0.52251 |
| B  | -1.00074 | 0.39918  | -1.02906 | H | 5.52859  | -3.16371 | -0.88550 |
| C  | 1.01586  | -4.12522 | -1.27762 | H | 3.63826  | -4.72459 | -1.20102 |
| B  | 1.07539  | 0.80869  | -0.80780 | H | -4.26086 | -1.58969 | 0.91865  |
| O  | 3.60195  | 0.11839  | 2.37370  | H | -3.58747 | -1.89625 | 2.28342  |
| C  | -1.32186 | 1.16454  | 3.62895  | H | 3.67603  | 0.90283  | 2.94940  |
| O  | -1.50988 | -0.16464 | 3.08002  | H | 4.32059  | 0.23433  | 1.71517  |
| C  | -2.45607 | 2.06626  | 3.19706  | H | -0.59566 | -0.61904 | 3.07375  |
| O  | -3.81933 | -1.16273 | 1.68325  | H | 1.36951  | -1.84618 | 3.03503  |
| H  | 1.23705  | -5.19236 | -1.36829 | H | -1.27593 | 1.08482  | 4.72777  |
| H  | -4.84453 | 1.71247  | -1.61568 | H | -2.30794 | 3.07702  | 3.60617  |
| H  | -5.67426 | -0.61825 | -1.52977 | H | -2.49529 | 2.14795  | 2.09347  |
| H  | -3.52314 | -4.99487 | -1.42035 | H | -3.42512 | 1.68113  | 3.54816  |
| H  | -1.15950 | -5.70437 | -1.38769 | H | -0.34609 | 1.55997  | 3.27717  |

**\*CH<sub>3</sub>CH<sub>2</sub>OH + \*3H<sub>2</sub>O**

|   |          |          |         |   |          |          |         |
|---|----------|----------|---------|---|----------|----------|---------|
| C | 4.58438  | 1.29285  | 1.80304 | C | -1.53065 | 3.60858  | 1.51057 |
| C | 3.41791  | 2.09797  | 1.60215 | C | -2.76981 | 4.32355  | 1.65170 |
| C | 2.17999  | 1.43353  | 1.49407 | C | -3.99962 | 3.69356  | 1.63421 |
| C | 2.05079  | 0.01313  | 1.54195 | C | -4.10601 | 2.28115  | 1.47266 |
| C | 3.24576  | -0.77771 | 1.75821 | C | -2.88852 | 1.55112  | 1.40027 |
| C | 4.49763  | -0.07800 | 1.89275 | C | -1.60457 | 2.17275  | 1.42467 |
| C | 0.94439  | 2.10836  | 1.31879 | C | -5.31320 | 1.53099  | 1.36251 |
| C | 0.92922  | 3.55064  | 1.39045 | C | -5.29199 | 0.16863  | 1.13533 |
| C | 2.20572  | 4.21643  | 1.44820 | C | -4.06958 | -0.57474 | 0.99261 |
| C | 3.39557  | 3.52887  | 1.53678 | C | -2.83366 | 0.14406  | 1.16448 |
| C | -0.28185 | 4.26333  | 1.45784 | C | -4.06049 | -1.95665 | 0.71117 |

|    |          |          |          |   |          |          |          |
|----|----------|----------|----------|---|----------|----------|----------|
| C  | -2.86552 | -2.69463 | 0.64645  | H | 2.21199  | 5.31008  | 1.44758  |
| C  | -1.58086 | -2.05349 | 0.80665  | H | 5.55576  | 1.78579  | 1.89711  |
| C  | -0.43418 | -2.87451 | 0.97594  | H | 5.40000  | -0.67339 | 2.05501  |
| C  | -0.46383 | -4.27935 | 0.88955  | H | 4.34048  | 4.07632  | 1.59379  |
| C  | -1.72854 | -4.88770 | 0.60859  | H | -2.72308 | 5.41167  | 1.75123  |
| C  | -2.87185 | -4.12819 | 0.49900  | H | -4.91460 | 4.28579  | 1.72433  |
| C  | 0.76123  | -4.98027 | 1.12142  | H | -6.26994 | 2.05447  | 1.44339  |
| C  | 1.92315  | -4.30691 | 1.42744  | H | -6.23452 | -0.37673 | 1.03373  |
| C  | 1.97568  | -2.87082 | 1.51825  | H | -5.01336 | -2.48084 | 0.59131  |
| C  | 0.74950  | -2.13660 | 1.28010  | H | -3.83463 | -4.61928 | 0.33050  |
| B  | 0.63192  | -0.59424 | 1.39376  | H | -1.78374 | -5.97571 | 0.51266  |
| Cu | 1.60929  | -0.95985 | -0.45364 | H | 0.76366  | -6.07209 | 1.05932  |
| Cu | 0.54293  | 1.31389  | -0.82962 | H | 2.84684  | -4.86409 | 1.60468  |
| O  | 2.30544  | 2.00833  | -1.62999 | H | 2.98637  | 2.06397  | -0.92594 |
| C  | 3.17634  | -2.18489 | 1.79312  | H | 2.68669  | 1.42070  | -2.31152 |
| Cu | -0.86175 | -0.98562 | -1.07198 | H | -0.18871 | -1.82310 | -3.30618 |
| O  | -0.56961 | -2.36023 | -2.56217 | H | -1.41637 | -2.71324 | -2.89710 |
| B  | -1.43059 | -0.52244 | 1.01484  | H | 0.27461  | 0.32526  | -3.30686 |
| Cu | -1.77573 | 1.11991  | -0.50382 | H | 2.64167  | -2.21945 | -2.38133 |
| B  | -0.34988 | 1.26835  | 1.24239  | H | 1.49098  | -0.59954 | -5.73776 |
| O  | 2.54292  | -1.26715 | -2.18637 | H | 2.42244  | 1.73503  | -5.93151 |
| O  | 0.70634  | -0.35859 | -3.87427 | H | 1.71811  | 2.14463  | -4.34403 |
| C  | 1.09324  | 0.23415  | -5.14307 | H | 3.02871  | 0.92459  | -4.46159 |
| C  | 2.12759  | 1.32400  | -4.95343 | H | 0.19030  | 0.62145  | -5.64058 |
| H  | 4.09138  | -2.75934 | 1.96177  | H | 1.93019  | -0.91398 | -2.91207 |
| H  | -0.25097 | 5.35515  | 1.52021  |   |          |          |          |

**\*3H<sub>2</sub>O (ethanol pathway)**

|   |         |         |          |   |          |         |          |
|---|---------|---------|----------|---|----------|---------|----------|
| C | 1.87832 | 1.13945 | -1.18187 | C | 1.44795  | 4.85061 | -0.73286 |
| C | 1.34385 | 2.44099 | -0.94957 | C | 0.08155  | 4.88927 | -0.56251 |
| C | 2.12478 | 3.61161 | -0.97828 | C | -0.73603 | 3.70301 | -0.59160 |
| C | 3.51577 | 3.46996 | -1.28932 | C | -0.05110 | 2.43691 | -0.68743 |
| C | 4.06349 | 2.23440 | -1.55019 | C | -2.14195 | 3.77146 | -0.58887 |
| C | 3.28634 | 1.02300 | -1.49434 | C | -2.94316 | 2.62003 | -0.72914 |

|    |          |          |          |    |          |          |          |
|----|----------|----------|----------|----|----------|----------|----------|
| C  | -4.37861 | 2.68485  | -0.79806 | Cu | -1.92669 | 0.12704  | 0.99034  |
| C  | -5.17370 | 1.55721  | -0.85990 | B  | -0.79794 | 1.08450  | -0.71659 |
| C  | -4.60431 | 0.24866  | -0.85864 | Cu | 0.06474  | 1.31906  | 1.38019  |
| C  | -3.18638 | 0.16846  | -0.86099 | O  | 1.53691  | 2.55369  | 2.21512  |
| C  | -2.33660 | 1.31521  | -0.80934 | O  | 1.02991  | -2.77507 | 2.31857  |
| C  | -2.47531 | -1.06688 | -0.77644 | H  | 4.94286  | -0.31320 | -1.90260 |
| C  | -3.22471 | -2.29217 | -0.66754 | H  | -3.15253 | -4.43902 | -0.40327 |
| C  | -4.65732 | -2.19580 | -0.74236 | H  | -1.08600 | -5.78216 | -0.26232 |
| C  | -5.31831 | -0.98613 | -0.83273 | H  | 3.61361  | -4.84433 | -1.19111 |
| C  | -2.56001 | -3.52361 | -0.49167 | H  | 4.84567  | -2.76928 | -1.70226 |
| C  | -1.15624 | -3.61547 | -0.48466 | H  | 1.35345  | -5.99288 | -0.55038 |
| C  | -0.33231 | -2.43870 | -0.61451 | H  | -5.23539 | -3.12302 | -0.69556 |
| C  | 1.05207  | -2.60659 | -0.86286 | H  | -6.41136 | -0.96475 | -0.86151 |
| C  | 1.69594  | -3.85833 | -0.86027 | H  | -6.26209 | 1.65981  | -0.88721 |
| C  | 0.88260  | -5.00693 | -0.58806 | H  | -4.84559 | 3.67338  | -0.77124 |
| C  | -0.47900 | -4.88613 | -0.42030 | H  | -2.62490 | 4.75071  | -0.52383 |
| C  | 1.73300  | -1.37714 | -1.12235 | H  | -0.41958 | 5.85182  | -0.42714 |
| C  | 3.14939  | -1.43041 | -1.43768 | H  | 2.02831  | 5.77723  | -0.72055 |
| C  | 3.78043  | -2.72529 | -1.46044 | H  | 4.14277  | 4.36495  | -1.32589 |
| C  | 3.09341  | -3.88264 | -1.17272 | H  | 5.12707  | 2.14652  | -1.78705 |
| B  | 0.90664  | -0.06597 | -1.09039 | H  | 1.38347  | -3.35525 | 1.60926  |
| Cu | 2.04669  | -0.16127 | 0.68874  | H  | 1.81894  | -2.43016 | 2.78009  |
| O  | 3.13652  | 0.26941  | 2.31039  | H  | 1.25397  | 3.08766  | 2.98243  |
| C  | 3.87639  | -0.24579 | -1.67085 | H  | 1.84207  | 3.19779  | 1.54012  |
| Cu | -0.10254 | -1.28902 | 1.44270  | H  | 2.76780  | 1.15461  | 2.56349  |
| B  | -0.92446 | -1.01378 | -0.68367 | H  | 2.93040  | -0.31937 | 3.06344  |

**\*C<sub>2</sub>H<sub>4</sub> + \*2OH + \*2H<sub>2</sub>O**

|   |          |          |         |   |          |          |         |
|---|----------|----------|---------|---|----------|----------|---------|
| C | -0.46161 | -2.44173 | 1.07990 | C | -4.20561 | -2.68896 | 1.37618 |
| C | -1.84285 | -2.14447 | 1.18384 | C | -4.52045 | -1.34997 | 1.35010 |
| C | -2.84059 | -3.12766 | 1.31957 | C | -3.51258 | -0.32589 | 1.23842 |
| C | -2.41966 | -4.49187 | 1.34827 | C | -2.14173 | -0.74818 | 1.04121 |
| C | -1.08922 | -4.81707 | 1.19562 | C | -3.83296 | 1.03154  | 1.34803 |
| C | -0.07031 | -3.81830 | 1.02052 | C | -2.83706 | 2.02749  | 1.35227 |



|    |          |          |          |    |          |          |          |
|----|----------|----------|----------|----|----------|----------|----------|
| C  | -3.16451 | 3.39981  | 1.62885  | B  | -0.95106 | 0.24033  | 0.85546  |
| C  | -2.19529 | 4.36272  | 1.79667  | Cu | -1.65824 | -0.80514 | -0.98407 |
| C  | -0.80713 | 4.02416  | 1.72837  | O  | -3.29875 | -1.91114 | -1.81718 |
| C  | -0.47291 | 2.68647  | 1.42648  | C  | -3.39664 | 1.67281  | -1.77410 |
| C  | -1.45006 | 1.69117  | 1.13087  | H  | 1.53462  | -5.24607 | 0.71107  |
| C  | 0.85411  | 2.20275  | 1.37984  | H  | 4.05851  | 3.51807  | 1.46438  |
| C  | 1.92131  | 3.14976  | 1.54039  | H  | 5.74845  | 1.85716  | 0.77084  |
| C  | 1.57690  | 4.50927  | 1.85486  | H  | 5.65847  | -2.95979 | -0.00675 |
| C  | 0.26986  | 4.93439  | 1.95761  | H  | 3.87035  | -4.64953 | 0.17984  |
| C  | 3.26913  | 2.77173  | 1.33528  | H  | 6.37788  | -0.46185 | 0.20986  |
| C  | 3.60867  | 1.47713  | 0.92571  | H  | 2.39337  | 5.22170  | 2.00405  |
| C  | 2.57989  | 0.46701  | 0.74102  | H  | 0.04506  | 5.97564  | 2.20269  |
| C  | 3.00378  | -0.87297 | 0.47072  | H  | -2.47773 | 5.39651  | 2.01243  |
| C  | 4.33780  | -1.24427 | 0.30430  | H  | -4.22112 | 3.66246  | 1.72663  |
| C  | 5.32805  | -0.20382 | 0.37165  | H  | -4.87725 | 1.32453  | 1.48846  |
| C  | 4.97568  | 1.08889  | 0.68012  | H  | -5.56365 | -1.03258 | 1.42691  |
| C  | 1.91884  | -1.80651 | 0.49497  | H  | -4.99825 | -3.43714 | 1.45602  |
| C  | 2.24764  | -3.22475 | 0.47715  | H  | -3.16990 | -5.27812 | 1.46493  |
| C  | 3.62596  | -3.58577 | 0.24439  | H  | -0.78391 | -5.86696 | 1.18336  |
| C  | 4.62263  | -2.64607 | 0.14786  | H  | 3.95803  | 0.60178  | -1.99017 |
| B  | 0.51451  | -1.26061 | 0.88334  | H  | 3.31312  | 1.62344  | -2.95527 |
| Cu | 0.80186  | -1.38284 | -1.20481 | H  | -3.84824 | -2.23063 | -1.07085 |
| O  | -0.42568 | -1.02928 | -2.62404 | H  | -2.94051 | -2.72384 | -2.22307 |
| C  | 1.26798  | -4.18577 | 0.74020  | H  | 0.28872  | 2.27067  | -2.75084 |
| B  | 1.07263  | 0.71332  | 1.04416  | H  | -0.69371 | -1.85208 | -3.07753 |
| Cu | 1.61500  | 1.15868  | -0.95978 | H  | -2.16802 | 1.23790  | -3.49206 |
| O  | 3.12926  | 0.79544  | -2.47221 | H  | -3.91030 | 2.45282  | -1.20638 |
| Cu | -1.41232 | 1.70345  | -1.06524 | H  | -3.78766 | 0.65646  | -1.66881 |
| C  | -2.52614 | 2.00066  | -2.79346 | H  | -2.34155 | 3.04473  | -3.06345 |
| O  | 0.32571  | 2.36826  | -1.78261 |    |          |          |          |

**\*C<sub>2</sub>H<sub>4</sub> + \*OH + \*3H<sub>2</sub>O**

|   |         |          |          |   |         |          |          |
|---|---------|----------|----------|---|---------|----------|----------|
| C | 1.46887 | -4.98372 | -1.11638 | C | 0.18517 | -2.93230 | -0.90537 |
| C | 0.19745 | -4.34031 | -0.97295 | C | 1.36757 | -2.13175 | -1.02005 |

|    |          |          |          |    |          |          |          |
|----|----------|----------|----------|----|----------|----------|----------|
| C  | 2.64009  | -2.81160 | -1.20429 | C  | -1.99850 | 1.57839  | 2.59102  |
| C  | 2.62922  | -4.25113 | -1.22977 | Cu | 0.84779  | 1.21591  | 1.25302  |
| C  | -1.06330 | -5.00964 | -0.95517 | O  | 1.82309  | 2.78383  | 2.39866  |
| C  | -2.24208 | -4.29336 | -0.95957 | C  | 3.82777  | -2.07579 | -1.34614 |
| C  | -2.26512 | -2.85698 | -0.96598 | B  | 0.12590  | 1.17731  | -0.83482 |
| C  | -1.00534 | -2.16178 | -0.83459 | Cu | 1.69603  | -1.11253 | 0.82220  |
| C  | -3.46853 | -2.14467 | -1.15883 | O  | 1.73573  | -0.29197 | 2.56558  |
| C  | -3.48620 | -0.74300 | -1.32190 | O  | -3.09931 | -1.80892 | 1.89374  |
| C  | -2.26847 | 0.01659  | -1.24516 | H  | 4.77542  | -2.60691 | -1.47192 |
| C  | -2.34673 | 1.43253  | -1.39617 | H  | -4.40518 | -2.70265 | -1.24694 |
| C  | -3.56895 | 2.13131  | -1.62586 | H  | -3.19893 | -4.82065 | -1.00508 |
| C  | -4.74820 | 1.34434  | -1.73898 | H  | 1.50562  | -6.07575 | -1.15618 |
| C  | -4.70523 | -0.02895 | -1.58669 | H  | 3.58611  | -4.76535 | -1.35557 |
| C  | -1.10293 | 2.08352  | -1.17838 | H  | -1.08559 | -6.10242 | -0.98013 |
| C  | -1.07787 | 3.51892  | -1.15417 | H  | -5.62864 | -0.60980 | -1.65971 |
| C  | -2.30994 | 4.21137  | -1.40854 | H  | -5.70319 | 1.84301  | -1.92456 |
| C  | -3.50295 | 3.55094  | -1.64378 | H  | -4.41765 | 4.12306  | -1.81997 |
| C  | 0.12376  | 4.20589  | -0.88656 | H  | -2.29148 | 5.30470  | -1.40377 |
| C  | 1.34333  | 3.52310  | -0.71515 | H  | 0.11829  | 5.29944  | -0.86177 |
| C  | 2.58689  | 4.23340  | -0.57529 | H  | 2.54658  | 5.32185  | -0.47959 |
| C  | 3.80955  | 3.59131  | -0.60419 | H  | 4.73373  | 4.16722  | -0.50766 |
| C  | 3.88575  | 2.18178  | -0.81459 | H  | 6.04988  | 1.96624  | -0.94395 |
| C  | 2.66679  | 1.46657  | -0.87954 | H  | 5.99615  | -0.47661 | -1.31756 |
| C  | 1.39688  | 2.08095  | -0.73142 | H  | -3.51949 | -1.75146 | 1.00642  |
| C  | 5.09276  | 1.43934  | -0.98425 | H  | -3.38736 | -0.99768 | 2.35093  |
| C  | 5.06071  | 0.07676  | -1.19646 | H  | 2.34649  | 3.28848  | 1.74065  |
| C  | 3.83089  | -0.66718 | -1.23920 | H  | 2.49153  | 2.35534  | 2.96726  |
| C  | 2.59680  | 0.06380  | -1.10225 | H  | 0.56787  | -1.25477 | 3.12832  |
| B  | 1.19201  | -0.59136 | -1.13521 | H  | 2.61780  | -0.06236 | 2.90734  |
| B  | -0.87063 | -0.59859 | -0.91319 | H  | -1.27305 | 2.36331  | 2.82441  |
| Cu | -0.91987 | -1.38184 | 1.16776  | H  | -3.93187 | 1.14921  | 1.72551  |
| O  | -0.30493 | -1.77777 | 3.09683  | H  | -3.20851 | 2.81226  | 1.28872  |
| Cu | -1.55083 | 0.94526  | 0.65839  | H  | -1.98202 | 0.69460  | 3.23493  |
| C  | -3.08041 | 1.83561  | 1.76637  | H  | -0.04876 | -2.71277 | 3.20682  |

**\*CH<sub>3</sub>CH<sub>2</sub> + \*OH + \*3H<sub>2</sub>O**

|   |          |          |          |    |          |          |          |
|---|----------|----------|----------|----|----------|----------|----------|
| C | 2.29081  | 1.34434  | -1.12896 | Cu | 1.96589  | 0.07661  | 1.05337  |
| C | 1.59130  | 2.57680  | -1.13244 | O  | 1.40830  | 1.04701  | 2.61297  |
| C | 2.22312  | 3.82855  | -1.24349 | Cu | 0.13683  | 1.83652  | 1.10557  |
| C | 3.64802  | 3.83966  | -1.35316 | B  | -0.39394 | 0.98075  | -0.92437 |
| C | 4.36177  | 2.66146  | -1.32208 | Cu | -1.89466 | 0.49647  | 0.73720  |
| C | 3.72532  | 1.38075  | -1.17799 | C  | -2.62601 | 0.18280  | 2.52259  |
| C | 0.17778  | 2.42486  | -0.99577 | C  | -4.05009 | -0.36487 | 2.31196  |
| C | -0.64247 | 3.59921  | -1.19209 | C  | 4.48682  | 0.20016  | -1.01861 |
| C | 0.01833  | 4.88011  | -1.24126 | B  | -0.27865 | -1.07109 | -0.82567 |
| C | 1.38920  | 4.99587  | -1.24887 | Cu | -0.34323 | -1.36815 | 1.31948  |
| C | -2.02432 | 3.49330  | -1.39852 | O  | -1.74733 | -2.98841 | 2.11688  |
| C | -2.65790 | 2.24068  | -1.49897 | O  | 0.44108  | -1.28134 | 3.29068  |
| C | -1.90776 | 1.02720  | -1.29610 | O  | 0.25663  | 3.86127  | 1.94140  |
| C | -2.58595 | -0.21811 | -1.44838 | H  | 5.57716  | 0.25318  | -1.08212 |
| C | -3.96403 | -0.31295 | -1.74384 | H  | -2.07108 | -4.77068 | -0.91676 |
| C | -4.68251 | 0.90682  | -1.94514 | H  | 0.03595  | -5.83649 | -0.27001 |
| C | -4.05258 | 2.12620  | -1.82705 | H  | 4.65844  | -4.33199 | -0.12773 |
| C | -4.52803 | -1.62532 | -1.79835 | H  | 5.72821  | -2.14873 | -0.55862 |
| C | -3.75354 | -2.73367 | -1.53242 | H  | 2.48732  | -5.73669 | 0.02456  |
| C | -2.35602 | -2.63871 | -1.20543 | H  | -4.20586 | -3.72891 | -1.55654 |
| C | -1.75515 | -1.33965 | -1.19859 | H  | -5.58858 | -1.73990 | -2.03611 |
| C | -1.59676 | -3.78589 | -0.87633 | H  | -5.74833 | 0.85948  | -2.18202 |
| C | -0.23951 | -3.69173 | -0.52784 | H  | -4.61929 | 3.04953  | -1.97194 |
| C | 0.55056  | -4.87209 | -0.28529 | H  | -2.61314 | 4.40364  | -1.54185 |
| C | 1.91399  | -4.81849 | -0.12692 | H  | -0.60608 | 5.77519  | -1.30448 |
| C | 2.61359  | -3.56873 | -0.22354 | H  | 1.85721  | 5.98208  | -1.29866 |
| C | 1.84902  | -2.40779 | -0.37196 | H  | 4.16711  | 4.79626  | -1.45309 |
| C | 0.42576  | -2.40533 | -0.46498 | H  | 5.45300  | 2.68600  | -1.38692 |
| C | 2.42399  | -1.11393 | -0.60068 | H  | -1.97935 | -3.44192 | 1.27768  |
| C | 3.87268  | -1.01961 | -0.70855 | H  | -2.56484 | -2.52213 | 2.37505  |
| C | 4.63899  | -2.22297 | -0.50122 | H  | -0.63696 | 4.11013  | 2.24563  |
| C | 4.04466  | -3.43748 | -0.26161 | H  | 0.40777  | 4.43964  | 1.16399  |
| B | 1.46101  | 0.04763  | -0.96939 | H  | 0.86248  | -0.36251 | 3.28693  |

|   |          |          |         |   |          |          |         |
|---|----------|----------|---------|---|----------|----------|---------|
| H | 2.04437  | 1.70843  | 2.93832 | H | -2.04068 | -0.49088 | 3.16718 |
| H | -2.66178 | 1.15280  | 3.04828 | H | 1.19253  | -1.89685 | 3.38254 |
| H | -4.06362 | -1.29010 | 1.71056 | H | -4.55218 | -0.59325 | 3.27226 |
| H | -4.68528 | 0.35736  | 1.77478 |   |          |          |         |

**\*H + \*OH + \*3H<sub>2</sub>O**

|   |          |          |          |    |          |          |          |
|---|----------|----------|----------|----|----------|----------|----------|
| C | -0.96113 | -4.98510 | -1.13161 | C  | 5.01192  | -0.66488 | -1.38120 |
| C | -1.83267 | -3.86476 | -0.94786 | C  | 4.41014  | -1.89923 | -1.42588 |
| C | -1.25614 | -2.58327 | -0.98299 | C  | 2.97988  | -2.06162 | -1.35654 |
| C | 0.12350  | -2.34671 | -1.19541 | C  | 2.16579  | -0.87142 | -1.19851 |
| C | 0.98565  | -3.48544 | -1.33964 | B  | 0.61657  | -0.87661 | -1.19861 |
| C | 0.38950  | -4.79536 | -1.31673 | Cu | 1.30691  | -1.13408 | 0.75219  |
| C | -1.99767 | -1.38832 | -0.75523 | Cu | -1.30317 | -0.85471 | 1.23224  |
| C | -3.42930 | -1.49656 | -0.60910 | O  | -0.92906 | -2.59809 | 2.37136  |
| C | -4.00582 | -2.81715 | -0.56943 | C  | 2.38355  | -3.32771 | -1.44695 |
| C | -3.24660 | -3.95222 | -0.72190 | Cu | 0.54433  | 0.47009  | 2.54892  |
| C | -4.23572 | -0.34874 | -0.53424 | O  | 2.61053  | 1.49687  | 2.00330  |
| C | -3.68910 | 0.94558  | -0.65370 | B  | 0.42762  | 1.18990  | -1.15940 |
| C | -4.52609 | 2.11490  | -0.62262 | Cu | -0.64982 | 1.49920  | 0.75610  |
| C | -4.01810 | 3.38722  | -0.76618 | H  | -0.50060 | 1.67709  | 2.39381  |
| C | -2.61698 | 3.59737  | -0.95454 | B  | -1.24104 | -0.03382 | -0.83411 |
| C | -1.79006 | 2.45420  | -0.99842 | O  | 1.40063  | -1.29037 | 2.70902  |
| C | -2.27771 | 1.12895  | -0.83641 | O  | -3.00317 | -0.07657 | 2.48347  |
| C | -1.98083 | 4.87127  | -1.09825 | H  | 3.01549  | -4.21328 | -1.55775 |
| C | -0.61354 | 4.96664  | -1.22438 | H  | -5.31649 | -0.46269 | -0.41190 |
| C | 0.24943  | 3.81438  | -1.22436 | H  | -5.08551 | -2.89750 | -0.41850 |
| C | -0.36798 | 2.50989  | -1.15111 | H  | -1.37978 | -5.99440 | -1.11364 |
| C | 1.64413  | 3.94438  | -1.28465 | H  | 1.04935  | -5.65875 | -1.43755 |
| C | 2.48356  | 2.81224  | -1.25392 | H  | -3.71537 | -4.93865 | -0.68250 |
| C | 1.93498  | 1.48746  | -1.18913 | H  | -5.59968 | 1.96969  | -0.47664 |
| C | 2.83087  | 0.39519  | -1.21536 | H  | -4.68386 | 4.25307  | -0.73229 |
| C | 4.22626  | 0.53266  | -1.29386 | H  | -2.59648 | 5.77425  | -1.08736 |
| C | 4.75771  | 1.86192  | -1.32016 | H  | -0.14514 | 5.95097  | -1.30795 |
| C | 3.91654  | 2.95058  | -1.30341 | H  | 2.08796  | 4.94207  | -1.34077 |

|   |          |          |          |   |          |          |         |
|---|----------|----------|----------|---|----------|----------|---------|
| H | 4.33024  | 3.96194  | -1.33964 | H | 2.38961  | 1.58736  | 1.04901 |
| H | 5.84063  | 2.00030  | -1.37064 | H | 3.24484  | 0.75486  | 2.02236 |
| H | 6.10020  | -0.58030 | -1.43634 | H | -0.01299 | -2.39297 | 2.70685 |
| H | 5.01928  | -2.80203 | -1.52070 | H | 2.30805  | -1.24558 | 3.06351 |
| H | -3.67430 | 0.16448  | 1.81075  | H | -0.80563 | -3.34010 | 1.74720 |
| H | -2.59756 | 0.77876  | 2.73227  |   |          |          |         |

**\*4H<sub>2</sub>O (ethylene pathway)**

|   |          |          |         |    |          |          |          |
|---|----------|----------|---------|----|----------|----------|----------|
| C | -1.65629 | -1.86716 | 1.43192 | C  | 4.59582  | -1.54747 | 1.05398  |
| C | -2.88427 | -1.15801 | 1.41309 | C  | 4.62868  | -0.17519 | 0.92216  |
| C | -4.14430 | -1.78536 | 1.49689 | C  | 0.86923  | -2.02415 | 1.31134  |
| C | -4.16187 | -3.20859 | 1.61866 | C  | 0.74922  | -3.45923 | 1.45227  |
| C | -2.98720 | -3.92772 | 1.64886 | C  | 1.96485  | -4.23549 | 1.44623  |
| C | -1.69773 | -3.29739 | 1.55032 | C  | 3.20587  | -3.65743 | 1.32483  |
| C | -5.30315 | -0.94184 | 1.47951 | B  | -0.34295 | -1.05817 | 1.29243  |
| C | -5.18459 | 0.42392  | 1.37853 | Cu | 0.44877  | -1.50109 | -0.71982 |
| C | -3.90744 | 1.08548  | 1.27929 | O  | 1.72870  | -2.39853 | -2.10794 |
| C | -2.71740 | 0.25897  | 1.29895 | Cu | -0.63721 | -0.50209 | -2.72467 |
| C | -3.81009 | 2.47912  | 1.18944 | Cu | -1.64849 | -0.19029 | -0.57440 |
| C | -2.55632 | 3.12297  | 1.09140 | B  | -1.29126 | 0.84535  | 1.26154  |
| C | -2.46414 | 4.55261  | 0.94469 | C  | -0.51035 | -4.06105 | 1.57147  |
| C | -1.25696 | 5.19608  | 0.79074 | Cu | 0.44561  | 0.99310  | -1.07924 |
| C | -0.03404 | 4.45417  | 0.76188 | O  | 2.07549  | 1.75161  | -2.18399 |
| C | -0.11702 | 3.05941  | 0.92247 | B  | 0.81059  | 0.67898  | 1.08379  |
| C | -1.33853 | 2.37118  | 1.11124 | O  | 3.64234  | -0.61922 | -2.19214 |
| C | 1.01794  | 2.19360  | 0.88124 | O  | 0.22222  | -1.57746 | -4.25126 |
| C | 2.32136  | 2.80175  | 0.74203 | H  | -0.57838 | -5.14864 | 1.66677  |
| C | 2.38979  | 4.23401  | 0.57423 | H  | 4.45968  | 2.50748  | 0.63830  |
| C | 1.26856  | 5.02632  | 0.57742 | H  | 5.58508  | 0.33815  | 0.79263  |
| C | 3.48747  | 2.02174  | 0.76106 | H  | 4.10256  | -4.28292 | 1.31254  |
| C | 3.42960  | 0.62329  | 0.93514 | H  | 1.87552  | -5.32167 | 1.53600  |
| C | 2.17232  | -0.04502 | 1.10029 | H  | 5.52389  | -2.12479 | 1.03196  |
| C | 2.18063  | -1.45800 | 1.22850 | H  | 3.37795  | 4.68427  | 0.44528  |
| C | 3.35189  | -2.23447 | 1.21275 | H  | 1.35901  | 6.10792  | 0.44492  |

|   |          |          |          |   |          |          |          |
|---|----------|----------|----------|---|----------|----------|----------|
| H | -1.22112 | 6.28300  | 0.67786  | H | 1.91426  | 2.19789  | -3.03650 |
| H | -3.39299 | 5.13005  | 0.94843  | H | -0.37464 | -2.22810 | -4.66832 |
| H | -4.72357 | 3.08119  | 1.17870  | H | 0.84303  | -2.10959 | -3.68145 |
| H | -6.08235 | 1.04866  | 1.36846  | H | 3.12660  | 0.22580  | -2.22304 |
| H | -6.29210 | -1.40281 | 1.54972  | H | 2.07812  | -3.26674 | -1.83029 |
| H | -5.12379 | -3.72308 | 1.69311  | H | 4.01781  | -0.63375 | -1.28614 |
| H | -3.01821 | -5.01652 | 1.74522  | H | 2.53126  | -1.76149 | -2.15670 |
| H | 2.58031  | 2.38669  | -1.63200 |   |          |          |          |

**\*3H<sub>2</sub>O (ethylene pathway)**

|   |          |          |          |    |          |          |          |
|---|----------|----------|----------|----|----------|----------|----------|
| C | -3.07398 | -3.95989 | -1.51251 | C  | 5.26446  | -0.76405 | -1.15191 |
| C | -3.30896 | -2.54547 | -1.43249 | C  | 4.15889  | -1.67412 | -1.20429 |
| C | -2.18370 | -1.70300 | -1.38495 | C  | 2.86344  | -1.11557 | -1.23605 |
| C | -0.84443 | -2.19824 | -1.34664 | C  | 2.60902  | 0.29335  | -1.18996 |
| C | -0.63058 | -3.62521 | -1.43408 | C  | 4.26036  | -3.09781 | -1.25483 |
| C | -1.79770 | -4.46918 | -1.51821 | C  | 3.13137  | -3.88479 | -1.32794 |
| C | -4.59695 | -1.92631 | -1.34125 | C  | 1.80518  | -3.32821 | -1.34286 |
| C | -4.70850 | -0.56398 | -1.18090 | C  | 1.67710  | -1.89776 | -1.29290 |
| C | -3.55683 | 0.29803  | -1.11544 | B  | 0.30821  | -1.16895 | -1.27042 |
| C | -2.25880 | -0.29276 | -1.25098 | Cu | -0.66381 | -1.55299 | 0.72600  |
| C | -3.70025 | 1.68696  | -0.89745 | Cu | -0.64960 | 0.87964  | 1.00793  |
| C | -2.58260 | 2.53509  | -0.82783 | B  | -0.94198 | 0.50759  | -1.14940 |
| C | -1.24244 | 2.00512  | -0.92522 | C  | 0.66650  | -4.15664 | -1.42406 |
| C | -0.15866 | 2.93789  | -0.93597 | Cu | 1.46661  | -0.39045 | 0.56422  |
| C | -0.33035 | 4.32571  | -0.78985 | B  | 1.15336  | 0.79646  | -1.22307 |
| C | -1.66997 | 4.81878  | -0.64953 | O  | -2.49940 | -1.87377 | 1.72011  |
| C | -2.74150 | 3.96002  | -0.67139 | Cu | 0.44396  | -0.51406 | 2.73408  |
| C | 1.10600  | 2.32296  | -1.08855 | O  | 0.64260  | -0.82787 | 4.72650  |
| C | 2.27549  | 3.14532  | -1.03460 | O  | -2.62571 | 0.94940  | 1.97640  |
| C | 2.09384  | 4.56858  | -0.90756 | H  | 0.79976  | -5.24095 | -1.47673 |
| C | 0.84658  | 5.13983  | -0.79316 | H  | -4.70360 | 2.11437  | -0.81441 |
| C | 3.56694  | 2.57368  | -1.07080 | H  | -5.69647 | -0.10511 | -1.08783 |
| C | 3.74765  | 1.18647  | -1.12046 | H  | -3.93358 | -4.63394 | -1.55764 |
| C | 5.06251  | 0.59554  | -1.11832 | H  | -1.64228 | -5.54998 | -1.57574 |

|   |          |          |          |   |          |          |          |
|---|----------|----------|----------|---|----------|----------|----------|
| H | -5.49187 | -2.55320 | -1.37907 | H | 5.25218  | -3.55740 | -1.23983 |
| H | -3.75868 | 4.35055  | -0.57981 | H | 3.22809  | -4.97298 | -1.37239 |
| H | -1.82863 | 5.89420  | -0.53226 | H | -3.21467 | 1.31079  | 1.27299  |
| H | 0.74258  | 6.22360  | -0.69289 | H | -2.72849 | 1.54431  | 2.74241  |
| H | 2.98674  | 5.19987  | -0.89046 | H | 1.32065  | -0.25786 | 5.14018  |
| H | 4.44348  | 3.22693  | -1.02983 | H | 0.91918  | -1.74072 | 4.94095  |
| H | 5.92180  | 1.27095  | -1.07873 | H | -3.15450 | -2.13910 | 1.04074  |
| H | 6.28026  | -1.16837 | -1.13863 | H | -2.73447 | -0.93510 | 1.93617  |

For \*2H<sub>2</sub>O and \*H<sub>2</sub>O see C<sub>1</sub> pathway.

**c. Cu<sub>7</sub> cluster – C<sub>1</sub> pathway**

| * | =        |          |         | C <sub>33</sub> H <sub>15</sub> B <sub>3</sub> Cu <sub>7</sub> |          |          |          |
|---|----------|----------|---------|----------------------------------------------------------------|----------|----------|----------|
| C | -0.99542 | -2.16320 | 1.24951 | C                                                              | 3.44609  | 3.74180  | 0.84091  |
| C | -2.12252 | -1.38354 | 1.62113 | C                                                              | 2.40814  | 4.58228  | 1.17491  |
| C | -3.38520 | -1.94615 | 1.89662 | C                                                              | 4.35401  | 1.45778  | 0.47343  |
| C | -3.51181 | -3.36713 | 1.79470 | C                                                              | 4.19621  | 0.05931  | 0.44212  |
| C | -2.42901 | -4.15528 | 1.47457 | C                                                              | 2.90861  | -0.54570 | 0.65053  |
| C | -1.12869 | -3.60046 | 1.21255 | C                                                              | 2.81803  | -1.96417 | 0.64178  |
| C | -4.42987 | -1.05481 | 2.29502 | C                                                              | 3.93215  | -2.81144 | 0.41754  |
| C | -4.18802 | 0.29318  | 2.43473 | C                                                              | 5.19958  | -2.18571 | 0.22323  |
| C | -2.89895 | 0.87851  | 2.18099 | C                                                              | 5.31990  | -0.81242 | 0.23738  |
| C | -1.83138 | 0.00895  | 1.74890 | C                                                              | 1.49382  | -2.45063 | 0.82058  |
| C | -2.68134 | 2.25951  | 2.33462 | C                                                              | 1.27643  | -3.87144 | 0.78611  |
| C | -1.44041 | 2.84046  | 2.02301 | C                                                              | 2.41883  | -4.71858 | 0.58179  |
| C | -1.23195 | 4.25967  | 2.13237 | C                                                              | 3.69072  | -4.21741 | 0.40339  |
| C | -0.02428 | 4.85461  | 1.84718 | Cu                                                             | 1.31435  | -1.00444 | -0.93440 |
| C | 1.09699  | 4.06987  | 1.43024 | B                                                              | 0.35095  | -1.42135 | 1.02795  |
| C | 0.90287  | 2.68198  | 1.29543 | Cu                                                             | -1.14755 | -1.44263 | -0.73466 |
| C | -0.33447 | 2.02347  | 1.57639 | Cu                                                             | -2.67614 | -0.06949 | -2.02245 |
| C | 1.94225  | 1.79071  | 0.92032 | Cu                                                             | -0.68448 | 2.48136  | -2.28484 |
| C | 3.27113  | 2.31960  | 0.72219 | Cu                                                             | 1.13046  | 1.49254  | -1.01558 |

|    |          |          |          |   |          |          |         |
|----|----------|----------|----------|---|----------|----------|---------|
| B  | 1.61064  | 0.27498  | 0.87223  | H | 6.08006  | -2.81182 | 0.06000 |
| C  | -0.00871 | -4.41504 | 0.97342  | H | 4.44679  | 4.14821  | 0.67455 |
| B  | -0.38222 | 0.48129  | 1.50300  | H | 2.58008  | 5.65753  | 1.26530 |
| Cu | -1.28268 | 1.07368  | -0.35178 | H | 0.09493  | 5.93559  | 1.95275 |
| Cu | -0.29164 | 0.09669  | -2.41337 | H | -2.07563 | 4.87194  | 2.46138 |
| H  | -0.13471 | -5.50077 | 0.95070  | H | -3.50293 | 2.89808  | 2.66955 |
| H  | 5.35071  | 1.88317  | 0.32886  | H | -4.99336 | 0.96013  | 2.75320 |
| H  | 6.30035  | -0.35279 | 0.08811  | H | -5.42268 | -1.46069 | 2.50379 |
| H  | 4.53184  | -4.89687 | 0.24606  | H | -4.48367 | -3.82513 | 1.99386 |
| H  | 2.25458  | -5.79907 | 0.56597  | H | -2.53974 | -5.24146 | 1.42564 |

**\*COOH**

|   |          |          |          |    |          |          |          |
|---|----------|----------|----------|----|----------|----------|----------|
| C | -3.57211 | -4.11113 | -0.67761 | C  | 3.18500  | 0.83745  | -2.20208 |
| C | -3.79391 | -2.70368 | -0.76950 | C  | 4.48236  | 0.22914  | -2.32615 |
| C | -2.65680 | -1.87872 | -0.93749 | C  | 4.69737  | -1.11039 | -2.09380 |
| C | -1.32769 | -2.38150 | -0.99347 | C  | 3.61537  | -1.96807 | -1.71890 |
| C | -1.13189 | -3.79857 | -0.87677 | C  | 2.34419  | -1.38102 | -1.57232 |
| C | -2.29552 | -4.62855 | -0.72710 | C  | 2.07848  | -0.00048 | -1.80466 |
| C | -5.06378 | -2.05620 | -0.68524 | C  | 3.72217  | -3.38213 | -1.52039 |
| C | -5.15906 | -0.68272 | -0.74637 | C  | 2.61023  | -4.14046 | -1.23701 |
| C | -4.00912 | 0.16558  | -0.89786 | C  | 1.29983  | -3.55920 | -1.10562 |
| C | -2.72056 | -0.45990 | -0.99676 | C  | 1.18372  | -2.12309 | -1.22081 |
| C | -4.14302 | 1.56403  | -0.98403 | B  | -0.16959 | -1.35374 | -1.14048 |
| C | -3.03348 | 2.39898  | -1.19201 | Cu | 1.22460  | -1.36674 | 0.73500  |
| C | -1.70127 | 1.84597  | -1.27911 | Cu | 0.32290  | 0.30091  | 2.34476  |
| C | -0.64355 | 2.70658  | -1.68291 | Cu | 1.42599  | 1.07611  | 0.20838  |
| C | -0.81619 | 4.08786  | -1.89507 | B  | 0.61990  | 0.49588  | -1.70805 |
| C | -2.13038 | 4.62930  | -1.72051 | C  | 0.15904  | -4.35753 | -0.92696 |
| C | -3.18953 | 3.81546  | -1.39253 | Cu | -0.95511 | 1.63729  | 0.68727  |
| C | 0.59039  | 2.02773  | -1.88590 | B  | -1.38419 | 0.32406  | -1.14528 |
| C | 1.73278  | 2.81056  | -2.28605 | Cu | -1.28901 | -0.89199 | 0.70183  |
| C | 1.54646  | 4.22130  | -2.48783 | Cu | 2.70541  | 0.03027  | 2.02158  |
| C | 0.32979  | 4.83965  | -2.30420 | Cu | 0.81481  | 2.64968  | 1.97908  |
| C | 2.99374  | 2.20749  | -2.45458 | H  | 0.27436  | -5.44125 | -0.84045 |



|   |          |          |          |   |          |          |          |
|---|----------|----------|----------|---|----------|----------|----------|
| H | -5.14017 | 2.00727  | -0.91854 | H | 3.84552  | 2.82065  | -2.76031 |
| H | -6.13913 | -0.20426 | -0.67650 | H | 5.31686  | 0.87011  | -2.62240 |
| H | -4.43075 | -4.77571 | -0.55684 | H | 5.69726  | -1.53590 | -2.20711 |
| H | -2.14383 | -5.70782 | -0.64485 | H | 4.70203  | -3.85500 | -1.61856 |
| H | -5.96297 | -2.66471 | -0.56357 | H | 2.70104  | -5.22297 | -1.11818 |
| H | -4.19402 | 4.23448  | -1.29543 | C | -1.06777 | -0.49504 | 3.43229  |
| H | -2.28469 | 5.69981  | -1.87457 | O | -1.85317 | -1.37934 | 2.63308  |
| H | 0.22614  | 5.91347  | -2.47698 | O | -1.41600 | -0.33318 | 4.58902  |
| H | 2.41386  | 4.80929  | -2.79911 | H | -2.68916 | -1.64533 | 3.08754  |

| <b>*H<sub>2</sub>O</b> |          | <b>+</b> |         | <b>*CO</b> |          |          |          |
|------------------------|----------|----------|---------|------------|----------|----------|----------|
| C                      | 0.14809  | -2.41220 | 1.37250 | C          | 4.62142  | 2.34191  | 1.20807  |
| C                      | -1.25885 | -2.43678 | 1.55917 | C          | 5.31349  | 1.14887  | 1.23841  |
| C                      | -1.99704 | -3.63393 | 1.68635 | C          | 4.62344  | -0.09645 | 1.30471  |
| C                      | -1.27460 | -4.86366 | 1.62311 | C          | 3.20486  | -0.05139 | 1.35540  |
| C                      | 0.09565  | -4.87468 | 1.47500 | C          | 2.46393  | 1.16022  | 1.30167  |
| C                      | 0.86603  | -3.66612 | 1.37185 | C          | 2.38985  | -1.21422 | 1.34417  |
| C                      | -1.84346 | -1.13711 | 1.66137 | C          | 3.03094  | -2.50103 | 1.31221  |
| C                      | -3.26817 | -1.05431 | 1.89969 | C          | 4.46746  | -2.53259 | 1.28341  |
| C                      | -4.00538 | -2.28394 | 2.00903 | C          | 5.23334  | -1.38497 | 1.27463  |
| C                      | -3.40430 | -3.51891 | 1.90622 | Cu         | 1.73358  | -0.02110 | -0.51753 |
| C                      | -3.90334 | 0.19433  | 2.01676 | O          | 3.36535  | -0.00845 | -1.80823 |
| C                      | -3.18620 | 1.39537  | 1.86585 | C          | 0.82054  | -0.04631 | -3.90732 |
| C                      | -1.76044 | 1.37913  | 1.63968 | O          | 1.43225  | -0.06676 | -4.88301 |
| C                      | -1.09519 | 2.62909  | 1.47735 | B          | 0.84893  | -1.01929 | 1.30133  |
| C                      | -1.75430 | 3.87813  | 1.55111 | Cu         | -0.02421 | -1.82786 | -0.64392 |
| C                      | -3.16558 | 3.86228  | 1.77094 | Cu         | -1.86251 | -1.63753 | -2.22787 |
| C                      | -3.84382 | 2.67257  | 1.92129 | Cu         | -1.84419 | 1.60352  | -2.25497 |
| C                      | -0.95280 | 5.05369  | 1.43911 | Cu         | -0.00488 | 1.80750  | -0.67193 |
| C                      | 0.41554  | 4.96816  | 1.29643 | B          | 0.91318  | 1.06253  | 1.26610  |
| C                      | 1.10376  | 3.70806  | 1.24169 | C          | 2.27245  | -3.68692 | 1.31843  |
| C                      | 0.30640  | 2.50466  | 1.28793 | Cu         | -1.68366 | -0.00148 | -0.39834 |
| C                      | 2.50713  | 3.63451  | 1.19118 | B          | -0.91294 | 0.09216  | 1.61772  |
| C                      | 3.18585  | 2.40170  | 1.22963 | Cu         | -0.06328 | -0.02599 | -2.32075 |

|   |          |          |         |   |          |          |          |
|---|----------|----------|---------|---|----------|----------|----------|
| H | 2.78978  | -4.64997 | 1.30510 | H | -4.92309 | 2.68196  | 2.09526  |
| H | 3.08761  | 4.56003  | 1.14281 | H | -4.98074 | 0.23372  | 2.19828  |
| H | 5.17034  | 3.28560  | 1.15223 | H | -5.08170 | -2.21549 | 2.18812  |
| H | 6.32342  | -1.45394 | 1.23677 | H | -4.00028 | -4.42947 | 2.00663  |
| H | 4.95539  | -3.51048 | 1.25755 | H | -1.82437 | -5.80416 | 1.71119  |
| H | 6.40588  | 1.14749  | 1.20256 | H | 0.63348  | -5.82588 | 1.45177  |
| H | 1.01568  | 5.87998  | 1.23631 | H | 4.18269  | -0.24499 | -1.32355 |
| H | -1.43869 | 6.03151  | 1.48526 | H | 3.28042  | -0.68670 | -2.50568 |
| H | -3.70339 | 4.81194  | 1.83098 |   |          |          |          |

**\*CO**

|   |          |          |         |    |          |          |          |
|---|----------|----------|---------|----|----------|----------|----------|
| C | 4.70516  | -2.95721 | 0.71977 | C  | -4.25287 | -0.96621 | 2.32343  |
| C | 4.52227  | -1.54298 | 0.74201 | C  | -4.07721 | -2.32493 | 2.19152  |
| C | 3.20148  | -1.06324 | 0.93107 | C  | -2.79372 | -2.87196 | 1.87621  |
| C | 2.07418  | -1.92062 | 1.06442 | C  | -1.73454 | -1.96407 | 1.67347  |
| C | 2.28451  | -3.34296 | 1.02019 | C  | -1.87507 | -0.54465 | 1.79118  |
| C | 3.63195  | -3.81316 | 0.85331 | C  | -2.49142 | -4.26637 | 1.78778  |
| C | 5.55460  | -0.57082 | 0.59027 | C  | -1.20844 | -4.70243 | 1.53836  |
| C | 5.26632  | 0.77778  | 0.60678 | C  | -0.11305 | -3.79160 | 1.34514  |
| C | 3.93108  | 1.27996  | 0.77545 | C  | -0.40784 | -2.37802 | 1.38716  |
| C | 2.87193  | 0.32077  | 0.94021 | B  | 0.67241  | -1.27755 | 1.22590  |
| C | 3.66906  | 2.66297  | 0.81049 | Cu | -0.59564 | -1.80298 | -0.64659 |
| C | 2.37462  | 3.16749  | 1.02607 | Cu | -0.25907 | -0.00718 | -2.32448 |
| C | 1.25681  | 2.26930  | 1.19242 | Cu | -1.62469 | 0.42819  | -0.25390 |
| C | -0.01474 | 2.81316  | 1.51536 | B  | -0.61514 | 0.33806  | 1.65282  |
| C | -0.24904 | 4.20236  | 1.62124 | C  | 1.20734  | -4.24001 | 1.15606  |
| C | 0.86181  | 5.07568  | 1.40907 | Cu | 0.46384  | 1.72408  | -0.69796 |
| C | 2.11614  | 4.57696  | 1.13193 | B  | 1.38613  | 0.72377  | 1.12920  |
| C | -1.01307 | 1.82504  | 1.75835 | Cu | 1.53365  | -0.53272 | -0.68822 |
| C | -2.33732 | 2.27747  | 2.10254 | Cu | -2.43022 | -1.03612 | -2.05331 |
| C | -2.56365 | 3.69382  | 2.19915 | Cu | -1.50706 | 2.04364  | -2.09929 |
| C | -1.57075 | 4.62005  | 1.96681 | H  | 1.40400  | -5.31495 | 1.12675  |
| C | -3.38057 | 1.35545  | 2.31263 | H  | 4.49961  | 3.36385  | 0.69110  |
| C | -3.17908 | -0.02509 | 2.14645 | H  | 6.07256  | 1.50626  | 0.48889  |

|   |          |          |         |   |          |          |          |
|---|----------|----------|---------|---|----------|----------|----------|
| H | 5.71342  | -3.35822 | 0.59050 | H | -4.37478 | 1.72235  | 2.58065  |
| H | 3.79425  | -4.89381 | 0.82983 | H | -5.23801 | -0.56832 | 2.58043  |
| H | 6.58490  | -0.90961 | 0.45655 | H | -4.91897 | -3.00466 | 2.34457  |
| H | 2.95654  | 5.26181  | 0.99302 | H | -3.29675 | -4.99029 | 1.93499  |
| H | 0.70579  | 6.15470  | 1.48411 | H | -0.99622 | -5.77355 | 1.49314  |
| H | -1.78299 | 5.68835  | 2.05460 | C | 0.51781  | -0.26660 | -3.94476 |
| H | -3.56931 | 4.03002  | 2.46479 | O | 1.09344  | -0.46108 | -4.92394 |

**\*CHO + \*H<sub>2</sub>O**

|   |          |          |         |    |          |          |          |
|---|----------|----------|---------|----|----------|----------|----------|
| C | 5.31666  | -0.86893 | 1.27498 | C  | -1.59947 | -3.90488 | 1.62429  |
| C | 4.56709  | 0.34266  | 1.35711 | C  | -3.00225 | -3.95592 | 1.89658  |
| C | 3.15803  | 0.23439  | 1.36289 | C  | -3.73199 | -2.79765 | 2.04614  |
| C | 2.46967  | -1.00611 | 1.26933 | C  | -0.74825 | -5.04798 | 1.49146  |
| C | 3.24663  | -2.20933 | 1.19228 | C  | 0.60517  | -4.89917 | 1.29668  |
| C | 4.67839  | -2.08790 | 1.19128 | C  | 1.22835  | -3.60553 | 1.20223  |
| C | 2.29093  | 1.35792  | 1.32392 | C  | 0.37614  | -2.43867 | 1.24243  |
| C | 2.87454  | 2.66854  | 1.31293 | B  | 0.91613  | -0.97075 | 1.21713  |
| C | 4.30850  | 2.76817  | 1.34305 | Cu | 0.04220  | -1.78003 | -0.72715 |
| C | 5.12415  | 1.65765  | 1.36467 | Cu | -0.09037 | 0.04760  | -2.35242 |
| C | 2.06367  | 3.81917  | 1.28850 | Cu | -1.72432 | -0.00541 | -0.39474 |
| C | 0.66134  | 3.73285  | 1.30140 | B  | -0.93686 | -0.09275 | 1.61418  |
| C | -0.16192 | 4.91002  | 1.39039 | C  | 2.62412  | -3.47163 | 1.14386  |
| C | -1.52683 | 4.84000  | 1.54484 | Cu | -0.10352 | 1.89025  | -0.72541 |
| C | -2.19039 | 3.57468  | 1.63697 | B  | 0.76256  | 1.08659  | 1.24985  |
| C | -1.40376 | 2.41448  | 1.51304 | Cu | 1.70780  | 0.13294  | -0.55020 |
| C | 0.00034  | 2.44677  | 1.29643 | O  | 3.38070  | 0.17478  | -1.74691 |
| C | -3.58918 | 3.40190  | 1.88395 | Cu | -1.85266 | -1.62001 | -2.21997 |
| C | -4.12986 | 2.14342  | 2.01964 | Cu | -1.96094 | 1.58011  | -2.23974 |
| C | -3.33581 | 0.94879  | 1.91864 | C  | 1.04559  | -0.12214 | -3.86742 |
| C | -1.92348 | 1.09265  | 1.64856 | O  | 2.26434  | -0.21160 | -4.07360 |
| C | -3.90863 | -0.32469 | 2.07845 | H  | 3.24469  | -4.37084 | 1.09747  |
| C | -3.13550 | -1.49366 | 1.94595 | H  | 2.53527  | 4.80537  | 1.28704  |
| C | -1.72152 | -1.41566 | 1.68799 | H  | 4.74935  | 3.76828  | 1.33751  |
| C | -1.00742 | -2.63094 | 1.50861 | H  | 6.40801  | -0.81773 | 1.26397  |

|   |          |          |         |   |          |          |          |
|---|----------|----------|---------|---|----------|----------|----------|
| H | 5.26766  | -3.00586 | 1.12203 | H | -4.80420 | -2.85409 | 2.25159  |
| H | 6.21055  | 1.77316  | 1.36933 | H | -3.48918 | -4.92957 | 1.99076  |
| H | 0.33475  | 5.88275  | 1.35605 | H | -1.18643 | -6.04588 | 1.56892  |
| H | -2.11988 | 5.75440  | 1.62327 | H | 1.24860  | -5.78038 | 1.23102  |
| H | -4.22284 | 4.28683  | 1.97862 | H | 3.95839  | -0.56590 | -1.48029 |
| H | -5.19827 | 2.02723  | 2.21973 | H | 3.06490  | -0.03695 | -2.68714 |
| H | -4.97926 | -0.41097 | 2.28266 | H | 0.40295  | -0.16771 | -4.79556 |

**\*CH<sub>2</sub>O + \*H<sub>2</sub>O alternative pathway higher in free energy**

|   |          |          |         |    |          |          |          |
|---|----------|----------|---------|----|----------|----------|----------|
| C | 0.43555  | -2.57263 | 1.10213 | C  | 4.69396  | 0.12855  | 1.14839  |
| C | -0.95291 | -2.74380 | 1.33809 | C  | 5.27161  | 1.42999  | 1.19051  |
| C | -1.57941 | -4.01055 | 1.37945 | C  | 4.47736  | 2.55602  | 1.27375  |
| C | -0.75631 | -5.15794 | 1.17285 | C  | 2.56389  | -1.17987 | 1.13152  |
| C | 0.60260  | -5.03020 | 0.98008 | C  | 3.31119  | -2.39722 | 0.97237  |
| C | 1.26021  | -3.75243 | 0.96759 | C  | 4.74429  | -2.30084 | 0.92464  |
| C | -2.97866 | -4.04028 | 1.66452 | C  | 5.41009  | -1.09470 | 1.00894  |
| C | -3.67622 | -2.87853 | 1.91297 | Cu | 1.72693  | 0.09389  | -0.57294 |
| C | -3.05147 | -1.58362 | 1.90326 | O  | 2.99528  | 0.19839  | -2.18672 |
| C | -1.63734 | -1.51823 | 1.60268 | B  | 1.00940  | -1.11637 | 1.15322  |
| C | -3.78369 | -0.41400 | 2.17290 | Cu | 0.09646  | -1.81318 | -0.82568 |
| C | -3.18338 | 0.85591  | 2.09609 | Cu | -1.85719 | -1.64321 | -2.26883 |
| C | -3.94678 | 2.05832  | 2.29318 | Cu | -2.11174 | 1.54591  | -1.99653 |
| C | -3.38427 | 3.31401  | 2.21742 | Cu | -0.16216 | 1.78761  | -0.52674 |
| C | -1.99378 | 3.47788  | 1.93764 | B  | 0.89189  | 0.94984  | 1.29566  |
| C | -1.23224 | 2.30639  | 1.71990 | C  | 2.65954  | -3.64250 | 0.88341  |
| C | -1.77490 | 0.98784  | 1.80147 | Cu | -1.68928 | -0.17477 | -0.30424 |
| C | 0.16445  | 2.32654  | 1.46437 | B  | -0.81122 | -0.21250 | 1.65875  |
| C | 0.85386  | 3.59644  | 1.50080 | Cu | -0.19870 | 0.11936  | -2.29992 |
| C | 0.05880  | 4.77793  | 1.69155 | C  | 0.43394  | 1.58383  | -3.65103 |
| C | -1.30380 | 4.72642  | 1.89637 | O  | 0.93766  | 0.41514  | -3.94381 |
| C | 2.25642  | 3.65339  | 1.40801 | H  | 3.25825  | -4.55078 | 0.77227  |
| C | 3.04238  | 2.48800  | 1.32163 | H  | 2.75092  | 4.62815  | 1.43275  |
| C | 2.43307  | 1.18581  | 1.29635 | H  | 4.94053  | 3.54594  | 1.29881  |
| C | 3.27746  | 0.04585  | 1.22161 | H  | 6.50154  | -1.06660 | 0.95741  |

|   |          |          |         |   |          |          |          |
|---|----------|----------|---------|---|----------|----------|----------|
| H | 5.31320  | -3.22726 | 0.80989 | H | -3.49150 | -5.00501 | 1.69776  |
| H | 6.35912  | 1.52910  | 1.14450 | H | -1.21644 | -6.14915 | 1.18827  |
| H | 0.57237  | 5.74277  | 1.69133 | H | 1.22061  | -5.92297 | 0.85256  |
| H | -1.87021 | 5.64880  | 2.04829 | H | 3.49893  | -0.63443 | -2.26805 |
| H | -3.99864 | 4.20239  | 2.38370 | H | 2.38199  | 0.21580  | -2.98109 |
| H | -5.01188 | 1.95127  | 2.51542 | H | -0.42059 | 1.95629  | -4.23997 |
| H | -4.84961 | -0.49188 | 2.40345 | H | 1.04890  | 2.32790  | -3.11978 |
| H | -4.74503 | -2.92549 | 2.13809 |   |          |          |          |

**\*HCOO**

|   |          |          |         |    |          |          |          |
|---|----------|----------|---------|----|----------|----------|----------|
| C | 5.22826  | -1.48409 | 1.09422 | C  | -3.41398 | -3.46172 | 2.00745  |
| C | 4.63961  | -0.18444 | 1.12313 | C  | -2.01640 | -3.59727 | 1.73901  |
| C | 3.22786  | -0.11241 | 1.19947 | C  | -1.26510 | -2.41351 | 1.59171  |
| C | 2.38578  | -1.25606 | 1.22373 | C  | -1.82016 | -1.10918 | 1.71870  |
| C | 3.00434  | -2.55060 | 1.18769 | C  | -1.31829 | -4.84310 | 1.64947  |
| C | 4.43850  | -2.61347 | 1.12438 | C  | 0.04375  | -4.87465 | 1.45912  |
| C | 5.35694  | 1.04730  | 1.05755 | C  | 0.82820  | -3.67608 | 1.32638  |
| C | 4.68659  | 2.25180  | 1.05189 | C  | 0.13495  | -2.40814 | 1.34419  |
| C | 3.25378  | 2.33549  | 1.10860 | B  | 0.84711  | -1.02237 | 1.24458  |
| C | 2.50862  | 1.11185  | 1.17753 | Cu | -0.19276 | -1.82675 | -0.63699 |
| C | 2.59914  | 3.58192  | 1.12008 | Cu | -0.19500 | -0.01289 | -2.34908 |
| C | 1.20131  | 3.67784  | 1.20790 | Cu | -1.68029 | 0.15494  | -0.38328 |
| C | 0.38192  | 2.48807  | 1.24679 | B  | -0.86867 | 0.10000  | 1.62329  |
| C | -1.00854 | 2.64088  | 1.49151 | C  | 2.22809  | -3.72416 | 1.23107  |
| C | -1.63350 | 3.89768  | 1.61789 | Cu | 0.05771  | 1.88501  | -0.74097 |
| C | -0.81190 | 5.06412  | 1.50821 | B  | 0.95624  | 1.03579  | 1.19736  |
| C | 0.54589  | 4.95358  | 1.31828 | Cu | 1.68493  | -0.07122 | -0.59915 |
| C | -1.69282 | 1.40210  | 1.65658 | Cu | -2.05820 | -1.55158 | -2.12340 |
| C | -3.10839 | 1.44495  | 1.93875 | Cu | -1.81706 | 1.78844  | -2.23175 |
| C | -3.73608 | 2.73387  | 2.03908 | H  | 2.72837  | -4.69588 | 1.20920  |
| C | -3.03792 | 3.91069  | 1.88828 | H  | 3.19509  | 4.49784  | 1.07992  |
| C | -3.84376 | 0.25927  | 2.11467 | H  | 5.24993  | 3.18677  | 0.99653  |
| C | -3.23067 | -1.00167 | 1.99293 | H  | 6.31546  | -1.57385 | 1.03754  |
| C | -3.98724 | -2.21561 | 2.13091 | H  | 4.90309  | -3.60238 | 1.09496  |

|   |          |          |         |   |          |          |          |
|---|----------|----------|---------|---|----------|----------|----------|
| H | 6.44772  | 1.02356  | 1.00295 | H | -4.02068 | -4.36229 | 2.12653  |
| H | 1.16662  | 5.85153  | 1.26398 | H | -1.88198 | -5.77320 | 1.75349  |
| H | -1.27724 | 6.04844  | 1.59782 | H | 0.56797  | -5.83252 | 1.41780  |
| H | -3.54975 | 4.87077  | 1.98791 | O | 2.88102  | -0.23478 | -2.17628 |
| H | -4.80754 | 2.76269  | 2.25362 | O | 1.21342  | -0.19617 | -3.72087 |
| H | -4.91356 | 0.31969  | 2.33087 | C | 2.42813  | -0.26815 | -3.36218 |
| H | -5.05561 | -2.12625 | 2.34436 | H | 3.17571  | -0.37205 | -4.17263 |

**\*HCOOH**

|   |          |          |         |    |          |          |          |
|---|----------|----------|---------|----|----------|----------|----------|
| C | 0.03250  | -2.42002 | 1.36615 | C  | 4.51556  | -0.10658 | 1.45673  |
| C | -1.38306 | -2.44139 | 1.46430 | C  | 3.09570  | -0.05869 | 1.43193  |
| C | -2.12956 | -3.63661 | 1.55722 | C  | 2.35887  | 1.15473  | 1.35348  |
| C | -1.40574 | -4.86692 | 1.54713 | C  | 2.27715  | -1.22061 | 1.40862  |
| C | -0.02874 | -4.88087 | 1.47820 | C  | 2.91674  | -2.50988 | 1.43489  |
| C | 0.74878  | -3.67418 | 1.40973 | C  | 4.35282  | -2.54206 | 1.48695  |
| C | -1.96946 | -1.13726 | 1.51804 | C  | 5.12143  | -1.39561 | 1.49331  |
| C | -3.40473 | -1.05073 | 1.69044 | Cu | 1.64595  | -0.03626 | -0.43645 |
| C | -4.14967 | -2.27959 | 1.75839 | O  | 3.08290  | -0.09469 | -2.01491 |
| C | -3.54701 | -3.51655 | 1.69217 | C  | 2.73330  | -0.09448 | -3.30962 |
| C | -4.03944 | 0.19882  | 1.79178 | O  | 1.55533  | -0.06336 | -3.64333 |
| C | -3.31193 | 1.39959  | 1.68892 | Cu | -0.01540 | -0.04266 | -2.32409 |
| C | -1.87799 | 1.38256  | 1.53031 | Cu | -1.80182 | 1.59813  | -2.34884 |
| C | -1.20517 | 2.63314  | 1.41534 | Cu | -0.06403 | 1.81165  | -0.68026 |
| C | -1.86550 | 3.88389  | 1.46774 | B  | 0.80555  | 1.06452  | 1.27969  |
| C | -3.28488 | 3.86846  | 1.61968 | B  | 0.73395  | -1.02747 | 1.32242  |
| C | -3.97027 | 2.67750  | 1.72627 | Cu | -0.05040 | -1.88323 | -0.66705 |
| C | -1.05670 | 5.05735  | 1.40015 | Cu | -1.78439 | -1.70476 | -2.34272 |
| C | 0.31679  | 4.96979  | 1.31334 | Cu | -1.70510 | -0.04907 | -0.51747 |
| C | 1.00531  | 3.70894  | 1.27730 | B  | -1.02989 | 0.09120  | 1.52892  |
| C | 0.20352  | 2.50796  | 1.28894 | C  | 2.15663  | -3.69484 | 1.43044  |
| C | 2.40980  | 3.63108  | 1.27692 | H  | 2.67309  | -4.65802 | 1.46336  |
| C | 3.08539  | 2.39651  | 1.32381 | H  | 2.99381  | 4.55573  | 1.26410  |
| C | 4.52027  | 2.33245  | 1.36928 | H  | 5.07319  | 3.27545  | 1.35131  |
| C | 5.20851  | 1.13751  | 1.42971 | H  | 6.21168  | -1.46789 | 1.52447  |

|   |          |          |         |   |          |          |          |
|---|----------|----------|---------|---|----------|----------|----------|
| H | 4.83916  | -3.52079 | 1.51662 | H | -5.23405 | -2.20858 | 1.87849  |
| H | 6.30134  | 1.13564  | 1.45576 | H | -4.15125 | -4.42485 | 1.76038  |
| H | 0.92001  | 5.88123  | 1.28351 | H | -1.96034 | -5.80672 | 1.61016  |
| H | -1.54137 | 6.03648  | 1.43197 | H | 0.50733  | -5.83328 | 1.49386  |
| H | -3.82462 | 4.81813  | 1.66168 | H | 3.56989  | -0.12531 | -4.02403 |
| H | -5.05677 | 2.68616  | 1.84775 | H | 4.05801  | -0.12343 | -1.89107 |
| H | -5.12438 | 0.24029  | 1.92100 |   |          |          |          |

**\*H<sub>2</sub>COOH**

|   |          |          |         |    |          |          |          |
|---|----------|----------|---------|----|----------|----------|----------|
| C | 5.13559  | -1.71438 | 1.11441 | C  | -2.15417 | -3.73260 | 1.56035  |
| C | 4.56868  | -0.40756 | 1.20893 | C  | -3.55551 | -3.58507 | 1.79910  |
| C | 3.15882  | -0.31525 | 1.28789 | C  | -4.11261 | -2.33448 | 1.95152  |
| C | 2.29750  | -1.44492 | 1.23155 | C  | -1.47394 | -4.98388 | 1.42339  |
| C | 2.89434  | -2.74729 | 1.13693 | C  | -0.10909 | -5.02894 | 1.25669  |
| C | 4.32802  | -2.83070 | 1.08418 | C  | 0.69679  | -3.83876 | 1.19379  |
| C | 2.45926  | 0.92089  | 1.32797 | C  | 0.02366  | -2.56205 | 1.25966  |
| C | 3.22412  | 2.13450  | 1.31368 | B  | 0.76124  | -1.18673 | 1.23621  |
| C | 4.65552  | 2.02900  | 1.25420 | Cu | -0.29495 | -1.83561 | -0.69157 |
| C | 5.30571  | 0.81466  | 1.20113 | Cu | -1.61968 | 0.25496  | -0.43725 |
| C | 2.58967  | 3.39055  | 1.36248 | B  | -0.95332 | -0.05305 | 1.58995  |
| C | 1.19115  | 3.50666  | 1.41002 | C  | 2.09700  | -3.90673 | 1.11362  |
| C | 0.54943  | 4.78835  | 1.54132 | Cu | 0.20993  | 1.88057  | -0.69110 |
| C | -0.81280 | 4.91262  | 1.68105 | B  | 0.90847  | 0.87392  | 1.31320  |
| C | -1.65689 | 3.75595  | 1.70415 | Cu | 1.65682  | -0.19916 | -0.52328 |
| C | -1.04690 | 2.49780  | 1.55024 | Cu | -0.09919 | 0.00348  | -2.38814 |
| C | 0.35262  | 2.32958  | 1.37509 | Cu | -2.09312 | -1.36954 | -2.21502 |
| C | -3.07275 | 3.78132  | 1.91254 | Cu | -1.60071 | 1.91372  | -2.25677 |
| C | -3.79489 | 2.61230  | 1.98625 | O  | 3.05926  | -0.12381 | -1.99737 |
| C | -3.18337 | 1.31690  | 1.86038 | C  | 2.52440  | 0.46355  | -3.27862 |
| C | -1.75803 | 1.26259  | 1.61689 | O  | 1.37757  | -0.17919 | -3.60527 |
| C | -3.93592 | 0.13852  | 1.99249 | H  | 2.58035  | -4.88522 | 1.05019  |
| C | -3.33285 | -1.12937 | 1.87682 | H  | 3.20102  | 4.29708  | 1.37129  |
| C | -1.91779 | -1.25198 | 1.66113 | H  | 5.23490  | 2.95575  | 1.24294  |
| C | -1.38024 | -2.55535 | 1.49039 | H  | 6.22147  | -1.81916 | 1.05736  |

|   |          |          |         |   |          |          |          |
|---|----------|----------|---------|---|----------|----------|----------|
| H | 4.77690  | -3.82451 | 1.01004 | H | -5.18614 | -2.23493 | 2.13265  |
| H | 6.39601  | 0.77589  | 1.14459 | H | -4.17994 | -4.47905 | 1.86520  |
| H | 1.18470  | 5.67775  | 1.54779 | H | -2.05407 | -5.90858 | 1.47065  |
| H | -1.26702 | 5.90007  | 1.79160 | H | 0.40010  | -5.99255 | 1.17742  |
| H | -3.57348 | 4.74529  | 2.03012 | H | 3.32012  | 0.28522  | -4.02875 |
| H | -4.87308 | 2.65071  | 2.16210 | H | 3.83879  | 0.40319  | -1.72328 |
| H | -5.01193 | 0.20850  | 2.17262 | H | 2.40590  | 1.54826  | -3.07863 |

**\*CH<sub>2</sub>O + \*H<sub>2</sub>O**

|   |          |          |         |    |          |          |          |
|---|----------|----------|---------|----|----------|----------|----------|
| C | -0.01810 | -2.39760 | 1.39298 | C  | 4.57507  | -0.31591 | 1.39923  |
| C | -1.43185 | -2.35201 | 1.51278 | C  | 5.33087  | 0.88978  | 1.33149  |
| C | -2.23588 | -3.50602 | 1.61549 | C  | 4.70331  | 2.11704  | 1.26348  |
| C | -1.57571 | -4.77266 | 1.57965 | C  | 2.28070  | -1.31340 | 1.43332  |
| C | -0.20330 | -4.85501 | 1.48461 | C  | 2.85405  | -2.63171 | 1.42056  |
| C | 0.63399  | -3.68799 | 1.41640 | C  | 4.28783  | -2.73942 | 1.41233  |
| C | -3.64292 | -3.31364 | 1.78476 | C  | 5.11570  | -1.63531 | 1.40361  |
| C | -4.17950 | -2.04917 | 1.88262 | Cu | 1.70135  | -0.08392 | -0.47616 |
| C | -3.37293 | -0.85919 | 1.81194 | O  | 3.24135  | -0.69270 | -1.74596 |
| C | -1.95038 | -1.01915 | 1.58725 | C  | 2.03992  | 0.71053  | -4.18821 |
| C | -3.93154 | 0.41863  | 1.97446 | O  | 1.07030  | -0.01493 | -3.95632 |
| C | -3.14049 | 1.58085  | 1.88592 | Cu | -0.07047 | -0.04786 | -2.30221 |
| C | -3.72860 | 2.88997  | 1.97652 | Cu | -1.83832 | 1.63082  | -2.22053 |
| C | -2.98659 | 4.04533  | 1.85656 | Cu | -1.85478 | -1.70583 | -2.24780 |
| C | -1.57864 | 3.98932  | 1.62846 | Cu | -1.70602 | -0.04643 | -0.43775 |
| C | -0.98819 | 2.70575  | 1.52795 | Cu | -0.01823 | 1.77080  | -0.63251 |
| C | -1.71868 | 1.49350  | 1.67714 | B  | 0.92855  | 1.03229  | 1.24903  |
| C | 0.39923  | 2.50807  | 1.30135 | B  | 0.75336  | -1.04319 | 1.35749  |
| C | 1.26097  | 3.66585  | 1.26561 | Cu | -0.05845 | -1.87643 | -0.64167 |
| C | 0.64401  | 4.96069  | 1.35322 | C  | 2.03806  | -3.77939 | 1.41353  |
| C | -0.71536 | 5.12005  | 1.52064 | B  | -0.94825 | 0.15956  | 1.59610  |
| C | 2.65848  | 3.51857  | 1.20548 | H  | 2.50636  | -4.76727 | 1.41739  |
| C | 3.27309  | 2.25228  | 1.24526 | H  | 3.28618  | 4.41352  | 1.16939  |
| C | 2.48672  | 1.05022  | 1.30665 | H  | 5.30210  | 3.03057  | 1.21665  |
| C | 3.15952  | -0.19617 | 1.41740 | H  | 6.20104  | -1.76326 | 1.38847  |



|   |          |          |         |   |          |          |          |
|---|----------|----------|---------|---|----------|----------|----------|
| H | 4.72152  | -3.74291 | 1.40562 | H | -4.29073 | -4.19096 | 1.85785  |
| H | 6.42234  | 0.83102  | 1.32689 | H | -2.17630 | -5.68375 | 1.64417  |
| H | 1.29282  | 5.83916  | 1.29998 | H | 0.28397  | -5.83342 | 1.48117  |
| H | -1.14518 | 6.12279  | 1.58826 | H | 2.63645  | 0.54451  | -5.10457 |
| H | -3.47213 | 5.02122  | 1.93891 | H | 3.91317  | -1.16842 | -1.21531 |
| H | -4.80704 | 2.95315  | 2.14534 | H | 2.32708  | 1.53079  | -3.50465 |
| H | -5.00762 | 0.51618  | 2.14294 | H | 2.88729  | -1.36893 | -2.35610 |
| H | -5.25468 | -1.92449 | 2.03697 |   |          |          |          |

**\*CH<sub>3</sub>OH + \*OH**

|   |          |          |         |    |          |          |          |
|---|----------|----------|---------|----|----------|----------|----------|
| C | 5.09359  | -2.11877 | 1.03081 | C  | -3.70396 | -3.32652 | 1.74724  |
| C | 4.62929  | -0.77311 | 1.12788 | C  | -2.32432 | -3.57369 | 1.46144  |
| C | 3.23063  | -0.57168 | 1.20237 | C  | -1.46386 | -2.46029 | 1.40038  |
| C | 2.28516  | -1.63009 | 1.15689 | C  | -1.89375 | -1.12020 | 1.63395  |
| C | 2.77757  | -2.97083 | 1.03864 | C  | -1.74637 | -4.87069 | 1.27962  |
| C | 4.20022  | -3.16746 | 0.98766 | C  | -0.39132 | -5.01638 | 1.09561  |
| C | 5.45894  | 0.38824  | 1.12340 | C  | 0.50421  | -3.89063 | 1.06001  |
| C | 4.90293  | 1.64804  | 1.17960 | C  | -0.06751 | -2.56603 | 1.16122  |
| C | 3.48295  | 1.86192  | 1.24367 | B  | 0.77744  | -1.25207 | 1.18565  |
| C | 2.62737  | 0.71195  | 1.24376 | Cu | -0.29322 | -1.82352 | -0.79413 |
| C | 2.94765  | 3.16075  | 1.33693 | Cu | -1.72268 | 0.15268  | -0.32173 |
| C | 1.56637  | 3.37924  | 1.45579 | B  | -0.82425 | -0.00728 | 1.65691  |
| C | 0.64016  | 2.26977  | 1.43676 | C  | 1.89420  | -4.06623 | 0.98963  |
| C | -0.72029 | 2.53202  | 1.75357 | Cu | 0.15477  | 1.75527  | -0.54972 |
| C | -1.22446 | 3.83191  | 1.96858 | B  | 1.07369  | 0.77849  | 1.26351  |
| C | -0.30221 | 4.92341  | 1.89677 | Cu | 1.69571  | -0.27200 | -0.61707 |
| C | 1.03455  | 4.69987  | 1.66181 | Cu | -0.35995 | 0.12598  | -2.35712 |
| C | -1.51491 | 1.35660  | 1.85750 | Cu | -2.20166 | -1.42461 | -2.18386 |
| C | -2.91593 | 1.51081  | 2.15335 | Cu | -1.78964 | 2.04761  | -1.91317 |
| C | -3.41834 | 2.84066  | 2.36160 | O  | 2.81219  | -0.37054 | -2.23104 |
| C | -2.61505 | 3.95601  | 2.27481 | O  | 1.02458  | 0.26181  | -3.77573 |
| C | -3.76823 | 0.39109  | 2.21320 | C  | 1.31964  | 1.59289  | -4.23410 |
| C | -3.28689 | -0.90300 | 1.94660 | H  | 2.30100  | -5.07820 | 0.91345  |
| C | -4.15639 | -2.04768 | 1.98203 | H  | 3.62601  | 4.01823  | 1.34583  |

|   |          |          |         |   |          |          |          |
|---|----------|----------|---------|---|----------|----------|----------|
| H | 5.55065  | 2.52854  | 1.17313 | H | -5.21104 | -1.87779 | 2.21408  |
| H | 6.16836  | -2.30735 | 0.97955 | H | -4.39369 | -4.17241 | 1.79522  |
| H | 4.56929  | -4.19311 | 0.90683 | H | -2.39600 | -5.74849 | 1.31323  |
| H | 6.54316  | 0.26660  | 1.06783 | H | 0.04253  | -6.01426 | 0.99288  |
| H | 1.73457  | 5.53888  | 1.64320 | H | 3.06195  | -1.30201 | -2.37012 |
| H | -0.67179 | 5.93964  | 2.05295 | H | 1.89785  | -0.06701 | -3.14690 |
| H | -3.03418 | 4.95062  | 2.44482 | H | 2.21018  | 1.56752  | -4.88556 |
| H | -4.48069 | 2.95340  | 2.59354 | H | 0.46501  | 1.97779  | -4.80946 |
| H | -4.82675 | 0.53390  | 2.44616 | H | 1.51051  | 2.27220  | -3.38503 |

**\*CH<sub>3</sub>OH + \*H<sub>2</sub>O**

|   |          |          |         |    |          |          |          |
|---|----------|----------|---------|----|----------|----------|----------|
| C | -0.49135 | -2.43325 | 1.35486 | C  | 5.03842  | 1.04082  | 1.58692  |
| C | -1.86588 | -2.11973 | 1.54704 | C  | 5.40630  | -0.28819 | 1.52611  |
| C | -2.88686 | -3.10303 | 1.58601 | C  | 4.42393  | -1.31697 | 1.45130  |
| C | -2.48782 | -4.46612 | 1.46238 | C  | 3.06118  | -0.91666 | 1.46885  |
| C | -1.15796 | -4.80576 | 1.32281 | C  | 2.65319  | 0.44224  | 1.50965  |
| C | -0.11119 | -3.82278 | 1.27823 | C  | 1.97639  | -1.82946 | 1.35640  |
| C | -2.11496 | -0.72751 | 1.69114 | C  | 2.27481  | -3.23332 | 1.25511  |
| C | -3.47696 | -0.29295 | 1.83591 | C  | 3.65784  | -3.62362 | 1.23834  |
| C | -4.50283 | -1.29879 | 1.88065 | C  | 4.68932  | -2.71149 | 1.33268  |
| C | -4.22623 | -2.64486 | 1.76157 | Cu | 1.65985  | -0.48071 | -0.40342 |
| C | -3.79415 | 1.07958  | 1.89922 | O  | 3.02770  | -0.83880 | -1.90210 |
| C | -2.80213 | 2.06730  | 1.78369 | B  | 0.53069  | -1.24682 | 1.33714  |
| C | -1.40606 | 1.70279  | 1.61774 | B  | 1.13024  | 0.74334  | 1.42925  |
| C | -0.43423 | 2.75588  | 1.61210 | Cu | 0.76453  | 1.87156  | -0.54516 |
| C | -0.76846 | 4.12117  | 1.73592 | Cu | -0.85655 | 2.50090  | -2.21648 |
| C | -2.15624 | 4.45113  | 1.83885 | Cu | -0.02435 | 0.21323  | -2.20176 |
| C | -3.12143 | 3.46969  | 1.85726 | O  | 1.17515  | -0.23166 | -3.83953 |
| C | 0.30672  | 5.05967  | 1.77245 | C  | 1.53199  | 0.86848  | -4.72418 |
| C | 1.61809  | 4.63898  | 1.71118 | C  | 1.24413  | -4.19089 | 1.20595  |
| C | 1.97516  | 3.25009  | 1.60476 | Cu | -1.52524 | 0.95637  | -0.41892 |
| C | 0.90044  | 2.28667  | 1.52088 | Cu | -2.30156 | -0.61500 | -2.15095 |
| C | 3.31708  | 2.82642  | 1.61660 | Cu | -0.73698 | -1.38818 | -0.47334 |
| C | 3.66450  | 1.46183  | 1.56730 | B  | -0.90837 | 0.23626  | 1.61311  |

|   |          |          |         |   |          |          |          |
|---|----------|----------|---------|---|----------|----------|----------|
| H | 1.50597  | -5.25060 | 1.13903 | H | -5.53701 | -0.96594 | 2.00405  |
| H | 4.11054  | 3.57669  | 1.67362 | H | -5.03698 | -3.37709 | 1.79766  |
| H | 5.80838  | 1.81502  | 1.64109 | H | -3.25255 | -5.24675 | 1.48856  |
| H | 5.72680  | -3.05551 | 1.31477 | H | -0.87125 | -5.85810 | 1.24797  |
| H | 3.88461  | -4.68972 | 1.15139 | H | 3.29774  | -1.77769 | -1.89259 |
| H | 6.46375  | -0.56513 | 1.52788 | H | 2.51642  | -0.71845 | -2.74646 |
| H | 2.42785  | 5.37186  | 1.76003 | H | 2.28866  | 0.52648  | -5.44438 |
| H | 0.07671  | 6.12449  | 1.86157 | H | 0.63765  | 1.23508  | -5.24676 |
| H | -2.44453 | 5.50272  | 1.91675 | H | 1.94247  | 1.65776  | -4.08414 |
| H | -4.17453 | 3.74597  | 1.95721 | H | 0.83927  | -0.97104 | -4.38087 |
| H | -4.83761 | 1.38382  | 2.01787 |   |          |          |          |

**\*CH<sub>3</sub>OH**

|   |          |          |          |    |          |          |          |
|---|----------|----------|----------|----|----------|----------|----------|
| C | -2.62008 | -4.99164 | -0.75640 | C  | 2.55369  | 2.58371  | -2.27313 |
| C | -3.13080 | -3.67104 | -0.92668 | C  | 3.01254  | 1.28498  | -1.99441 |
| C | -2.18587 | -2.62346 | -1.07250 | C  | 2.08660  | 0.22779  | -1.65780 |
| C | -0.78063 | -2.83498 | -1.01822 | C  | 2.62816  | -1.06852 | -1.39749 |
| C | -0.29184 | -4.17447 | -0.83346 | C  | 4.00513  | -1.36791 | -1.46170 |
| C | -1.26172 | -5.22819 | -0.71591 | C  | 4.89723  | -0.29528 | -1.77440 |
| C | -2.55323 | -1.25618 | -1.21459 | C  | 4.41577  | 0.96853  | -2.03080 |
| C | -3.95332 | -0.92214 | -1.22811 | C  | 4.39493  | -2.72598 | -1.24444 |
| C | -4.89815 | -1.99752 | -1.10145 | C  | 3.45736  | -3.70767 | -1.00984 |
| C | -4.51103 | -3.31295 | -0.95575 | C  | 2.04879  | -3.42500 | -0.95968 |
| C | -4.38117 | 0.40989  | -1.38798 | C  | 1.64013  | -2.04974 | -1.12466 |
| C | -3.46843 | 1.46785  | -1.55096 | B  | 0.15424  | -1.60356 | -1.14001 |
| C | -3.90104 | 2.81979  | -1.77876 | Cu | 1.30159  | -1.25264 | 0.81986  |
| C | -3.01240 | 3.84693  | -2.01006 | B  | 0.55292  | 0.40410  | -1.66290 |
| C | -1.60326 | 3.60853  | -2.04845 | Cu | 1.02746  | 1.17482  | 0.29315  |
| C | -1.16105 | 2.29001  | -1.81290 | Cu | 2.35409  | 0.42105  | 2.21675  |
| C | -2.04646 | 1.21648  | -1.53449 | Cu | -0.06784 | 0.17812  | 2.30329  |
| C | -0.60870 | 4.59370  | -2.33803 | O  | -0.85369 | -0.23261 | 4.15983  |
| C | 0.72293  | 4.25063  | -2.41073 | C  | -1.81322 | 0.73082  | 4.67271  |
| C | 1.18772  | 2.90724  | -2.19112 | C  | 1.09041  | -4.44312 | -0.80278 |
| C | 0.21068  | 1.89457  | -1.87146 | Cu | -1.44372 | 1.22024  | 0.50546  |

|    |          |          |          |   |          |          |          |
|----|----------|----------|----------|---|----------|----------|----------|
| Cu | -0.07692 | 2.59855  | 1.94994  | H | -0.92141 | 5.62548  | -2.51695 |
| B  | -1.42691 | -0.19229 | -1.33251 | H | 1.46963  | 5.01353  | -2.64609 |
| Cu | -1.17128 | -1.25176 | 0.59551  | H | 3.27646  | 3.36436  | -2.52500 |
| H  | 1.42858  | -5.47567 | -0.67913 | H | 5.11073  | 1.77464  | -2.28043 |
| H  | -5.45310 | 0.62459  | -1.40509 | H | 5.97060  | -0.49486 | -1.82262 |
| H  | -5.96148 | -1.74478 | -1.11976 | H | 5.45676  | -2.98217 | -1.28283 |
| H  | -3.32383 | -5.82162 | -0.65573 | H | 3.77727  | -4.74346 | -0.86952 |
| H  | -0.89211 | -6.24894 | -0.58668 | H | -2.22513 | 0.36411  | 5.62468  |
| H  | -5.26453 | -4.09843 | -0.85710 | H | -1.33838 | 1.71375  | 4.81352  |
| H  | -4.97575 | 3.01929  | -1.77582 | H | -2.60883 | 0.80853  | 3.92227  |
| H  | -3.38172 | 4.86118  | -2.18182 | H | -0.14768 | -0.33237 | 4.82601  |

| <b>*H<sub>2</sub>O</b> |          |          | +        | <b>*OH</b> |          |          | +        | <b>*CH<sub>4</sub></b> |  |  |
|------------------------|----------|----------|----------|------------|----------|----------|----------|------------------------|--|--|
| C                      | -3.40788 | -4.32758 | -0.97654 | C          | 3.12989  | 2.18391  | -2.12363 |                        |  |  |
| C                      | -3.65454 | -2.92506 | -1.07932 | C          | 3.33761  | 0.81922  | -1.86320 |                        |  |  |
| C                      | -2.52814 | -2.07324 | -1.16815 | C          | 2.22177  | -0.05525 | -1.56302 |                        |  |  |
| C                      | -1.18929 | -2.54179 | -1.12987 | C          | 2.49461  | -1.44686 | -1.38471 |                        |  |  |
| C                      | -0.96869 | -3.95474 | -1.01867 | C          | 3.78295  | -2.00335 | -1.46769 |                        |  |  |
| C                      | -2.11879 | -4.81390 | -0.94721 | C          | 4.87196  | -1.10938 | -1.72413 |                        |  |  |
| C                      | -2.61951 | -0.65693 | -1.22028 | C          | 4.65203  | 0.23559  | -1.91186 |                        |  |  |
| C                      | -3.92523 | -0.06386 | -1.21037 | C          | 3.90660  | -3.42214 | -1.32028 |                        |  |  |
| C                      | -5.06399 | -0.93712 | -1.13631 | C          | 2.79416  | -4.21052 | -1.13976 |                        |  |  |
| C                      | -4.94195 | -2.30847 | -1.07390 | C          | 1.46631  | -3.65798 | -1.08190 |                        |  |  |
| C                      | -4.08575 | 1.33189  | -1.28629 | C          | 1.32504  | -2.22164 | -1.16202 |                        |  |  |
| C                      | -2.98336 | 2.19074  | -1.41174 | B          | -0.04962 | -1.48302 | -1.16877 |                        |  |  |
| C                      | -3.16133 | 3.60685  | -1.58409 | Cu         | 1.07835  | -1.60489 | 0.83978  |                        |  |  |
| C                      | -2.10371 | 4.45765  | -1.81203 | Cu         | 2.63973  | -0.51138 | 2.27830  |                        |  |  |
| C                      | -0.76921 | 3.95320  | -1.90767 | Cu         | 1.64457  | 0.76214  | 0.41576  |                        |  |  |
| C                      | -0.57737 | 2.56501  | -1.72605 | B          | 0.74842  | 0.40648  | -1.59664 |                        |  |  |
| C                      | -1.64035 | 1.66840  | -1.42201 | C          | 0.33479  | -4.48510 | -0.99886 |                        |  |  |
| C                      | 0.38582  | 4.73967  | -2.20478 | Cu         | -0.74481 | 1.44299  | 0.49188  |                        |  |  |
| C                      | 1.62937  | 4.15269  | -2.29627 | Cu         | 0.29943  | 0.18792  | 2.41330  |                        |  |  |
| C                      | 1.83497  | 2.74460  | -2.09750 | O          | -0.86853 | -0.40222 | 3.85627  |                        |  |  |
| C                      | 0.68536  | 1.92693  | -1.83601 | C          | -3.39277 | 1.69637  | 2.09716  |                        |  |  |

|    |          |          |          |   |          |          |          |
|----|----------|----------|----------|---|----------|----------|----------|
| B  | -1.29118 | 0.15430  | -1.26181 | H | 2.50514  | 4.76869  | -2.51673 |
| Cu | -1.36337 | -1.01430 | 0.61400  | H | 3.98898  | 2.82474  | -2.33808 |
| O  | -2.35893 | -1.61181 | 2.25794  | H | 5.49447  | 0.89920  | -2.12348 |
| Cu | 0.83541  | 2.51575  | 1.92885  | H | 5.88501  | -1.51409 | -1.78551 |
| H  | 0.46903  | -5.56778 | -0.92824 | H | 4.90061  | -3.87241 | -1.37040 |
| H  | -5.09440 | 1.75320  | -1.27215 | H | 2.89799  | -5.29490 | -1.05386 |
| H  | -6.05657 | -0.47980 | -1.12527 | H | -2.23895 | -2.57256 | 2.37612  |
| H  | -4.25671 | -5.01227 | -0.91178 | H | -1.75705 | -1.14351 | 3.02850  |
| H  | -1.94609 | -5.88982 | -0.86222 | H | -4.46682 | 1.87838  | 2.25254  |
| H  | -5.83232 | -2.93840 | -1.00983 | H | -2.93025 | 1.35946  | 3.03425  |
| H  | -4.18032 | 3.99890  | -1.53904 | H | -3.26800 | 0.92304  | 1.32474  |
| H  | -2.27481 | 5.52877  | -1.94212 | H | -0.37944 | -1.08052 | 4.35679  |
| H  | 0.27095  | 5.81480  | -2.36146 | H | -2.91334 | 2.62941  | 1.76565  |

**\*H<sub>2</sub>O + \*OH**

|   |          |          |         |    |          |          |          |
|---|----------|----------|---------|----|----------|----------|----------|
| C | 5.46552  | -1.14581 | 0.62131 | C  | -3.77779 | 2.19424  | 2.25739  |
| C | 4.77335  | 0.09145  | 0.78399 | C  | -3.19141 | 3.43303  | 2.13829  |
| C | 3.36828  | 0.03622  | 0.93825 | C  | -3.64483 | -0.28367 | 2.26603  |
| C | 2.62731  | -1.17579 | 0.91042 | C  | -2.91187 | -1.47840 | 2.11073  |
| C | 3.34817  | -2.40479 | 0.74928 | C  | -3.54686 | -2.76138 | 2.23229  |
| C | 4.77581  | -2.33901 | 0.60280 | C  | -2.87356 | -3.94377 | 2.01482  |
| C | 5.38043  | 1.38401  | 0.77905 | C  | -1.49211 | -3.93850 | 1.65091  |
| C | 4.61130  | 2.52171  | 0.89519 | C  | -0.85835 | -2.68067 | 1.53647  |
| C | 3.18066  | 2.47522  | 1.03048 | C  | -1.51398 | -1.44796 | 1.78655  |
| C | 2.54821  | 1.18812  | 1.05698 | C  | -0.70059 | -5.10509 | 1.41197  |
| C | 2.42148  | 3.65526  | 1.14761 | C  | 0.63601  | -4.99678 | 1.10328  |
| C | 1.02458  | 3.62076  | 1.29566 | C  | 1.29457  | -3.72436 | 0.97957  |
| C | 0.31607  | 2.36088  | 1.30515 | C  | 0.50143  | -2.53009 | 1.14369  |
| C | -1.07332 | 2.37789  | 1.60226 | B  | 1.07916  | -1.07934 | 1.06082  |
| C | -1.80142 | 3.56122  | 1.81886 | Cu | -0.26006 | -1.66994 | -0.63440 |
| C | -1.09224 | 4.80200  | 1.73818 | Cu | -2.26122 | -1.52156 | -1.93599 |
| C | 0.26111  | 4.82445  | 1.49264 | Cu | -1.76517 | 0.27045  | -0.33490 |
| C | -1.64243 | 1.07235  | 1.71586 | B  | -0.70547 | -0.14956 | 1.60282  |
| C | -3.04211 | 0.97125  | 2.07541 | C  | 2.67864  | -3.64257 | 0.76745  |

|    |          |          |          |   |          |          |          |
|----|----------|----------|----------|---|----------|----------|----------|
| B  | 1.01203  | 0.97478  | 1.15468  | H | 0.79573  | 5.77694  | 1.46034  |
| Cu | 0.05496  | 1.87517  | -0.73797 | H | -1.63979 | 5.73461  | 1.89324  |
| Cu | -0.47031 | 0.06408  | -2.42685 | H | -3.78111 | 4.33818  | 2.30081  |
| O  | 0.73867  | -0.10945 | -3.93913 | H | -4.83674 | 2.11511  | 2.51628  |
| Cu | 1.70089  | -0.01958 | -0.77032 | H | -4.70534 | -0.33530 | 2.52567  |
| O  | 2.75065  | 0.10802  | -2.47813 | H | -4.60718 | -2.78306 | 2.49748  |
| Cu | -1.91097 | 2.00209  | -2.08471 | H | -3.39284 | -4.89974 | 2.11571  |
| H  | 3.25525  | -4.56344 | 0.64418  | H | -1.16919 | -6.08855 | 1.49483  |
| H  | 2.93260  | 4.62159  | 1.13555  | H | 1.23654  | -5.89729 | 0.95157  |
| H  | 5.08993  | 3.50432  | 0.88107  | H | 3.12732  | 1.00239  | -2.57599 |
| H  | 6.55136  | -1.13514 | 0.50205  | H | 0.71423  | -1.04139 | -4.22257 |
| H  | 5.31810  | -3.27893 | 0.47240  | H | 1.94859  | 0.03450  | -3.20079 |
| H  | 6.46456  | 1.46140  | 0.66897  |   |          |          |          |

**\*2H<sub>2</sub>O**

|   |          |          |         |    |          |          |          |
|---|----------|----------|---------|----|----------|----------|----------|
| C | 5.18338  | -1.81497 | 0.91495 | C  | -3.38292 | 3.13328  | 2.05224  |
| C | 4.70642  | -0.47290 | 0.92719 | C  | -2.60655 | 4.24635  | 1.81427  |
| C | 3.30475  | -0.28329 | 1.06576 | C  | -3.67277 | 0.67898  | 2.24371  |
| C | 2.37959  | -1.35839 | 1.17147 | C  | -3.17370 | -0.63008 | 2.12453  |
| C | 2.88911  | -2.70297 | 1.14653 | C  | -4.01898 | -1.77570 | 2.33005  |
| C | 4.31007  | -2.87859 | 1.01964 | C  | -3.55085 | -3.06812 | 2.23583  |
| C | 5.50790  | 0.69483  | 0.77573 | C  | -2.18011 | -3.33067 | 1.93118  |
| C | 4.93258  | 1.94910  | 0.73971 | C  | -1.34133 | -2.21628 | 1.70333  |
| C | 3.51332  | 2.15260  | 0.84209 | C  | -1.78747 | -0.86277 | 1.78785  |
| C | 2.68112  | 0.99188  | 1.00633 | C  | -1.58388 | -4.62639 | 1.86384  |
| C | 2.95424  | 3.44464  | 0.80706 | C  | -0.23567 | -4.77483 | 1.61771  |
| C | 1.57083  | 3.65751  | 0.95108 | C  | 0.63686  | -3.65097 | 1.41246  |
| C | 0.66313  | 2.54097  | 1.08664 | C  | 0.04273  | -2.33353 | 1.41700  |
| C | -0.69712 | 2.80820  | 1.38773 | B  | 0.86251  | -1.01219 | 1.23738  |
| C | -1.22317 | 4.11716  | 1.48414 | Cu | -0.25994 | -1.81062 | -0.59104 |
| C | -0.32252 | 5.20492  | 1.27632 | Cu | -2.20130 | -1.49906 | -1.99807 |
| C | 1.01465  | 4.98055  | 1.02707 | Cu | -1.65164 | 0.23319  | -0.33090 |
| C | -1.46481 | 1.63103  | 1.64127 | B  | -0.74272 | 0.26590  | 1.62719  |
| C | -2.85798 | 1.79604  | 1.98605 | C  | 2.02564  | -3.80955 | 1.25678  |

|    |          |          |          |   |          |          |          |
|----|----------|----------|----------|---|----------|----------|----------|
| Cu | 0.17919  | 1.81754  | -0.84271 | H | 1.69446  | 5.82750  | 0.90155  |
| Cu | -0.25393 | -0.08595 | -2.35276 | H | -0.70479 | 6.22729  | 1.33573  |
| O  | 0.89581  | -0.40487 | -4.05596 | H | -3.04229 | 5.24605  | 1.88936  |
| B  | 1.12483  | 1.04583  | 1.07316  | H | -4.43892 | 3.25194  | 2.30979  |
| Cu | 1.69104  | -0.20258 | -0.67120 | H | -4.72408 | 0.83071  | 2.50392  |
| O  | 2.97351  | -0.49546 | -2.26060 | H | -5.06889 | -1.59448 | 2.57596  |
| Cu | -1.79168 | 1.79375  | -2.23604 | H | -4.22562 | -3.91054 | 2.40882  |
| H  | 2.44736  | -4.81832 | 1.24607  | H | -2.21165 | -5.50700 | 2.02282  |
| H  | 3.61585  | 4.30844  | 0.69745  | H | 0.20619  | -5.77449 | 1.59231  |
| H  | 5.56567  | 2.83270  | 0.62213  | H | 3.42020  | -1.36085 | -2.18463 |
| H  | 6.25652  | -1.99468 | 0.81073  | H | 2.38599  | -0.56577 | -3.05786 |
| H  | 4.69590  | -3.90138 | 1.00466  | H | 0.64099  | -1.19946 | -4.56276 |
| H  | 6.59104  | 0.58550  | 0.67695  | H | 0.89957  | 0.33238  | -4.69597 |

**\*H<sub>2</sub>O**

|   |          |          |         |    |          |          |          |
|---|----------|----------|---------|----|----------|----------|----------|
| C | 5.17410  | -1.82995 | 0.96069 | C  | 11.26345 | -0.77394 | 0.45522  |
| C | 4.69202  | -0.49435 | 1.02941 | C  | 9.86364  | -0.41280 | 0.46265  |
| C | 3.31900  | -0.17234 | 1.16959 | C  | 11.65658 | -2.11852 | 0.59439  |
| C | 2.39984  | -1.25737 | 1.27881 | C  | 10.71492 | -3.15083 | 0.77073  |
| C | 2.84036  | -2.56373 | 1.25445 | C  | 11.12601 | -4.52094 | 0.90983  |
| C | 4.22795  | -2.90662 | 1.10870 | C  | 10.22409 | -5.55356 | 1.06011  |
| C | 5.72006  | 0.48279  | 0.92751 | C  | 8.82222  | -5.29889 | 1.10350  |
| C | 5.34109  | 1.86874  | 0.93873 | C  | 8.40500  | -3.94529 | 1.01411  |
| C | 3.94739  | 2.18355  | 1.09542 | C  | 9.30693  | -2.86556 | 0.82653  |
| C | 2.97545  | 1.21177  | 1.20286 | C  | 7.03803  | -3.55189 | 0.99356  |
| C | 6.30564  | 2.88341  | 0.77784 | C  | 6.03201  | -4.57279 | 1.10563  |
| C | 7.65962  | 2.58209  | 0.55915 | C  | 6.46853  | -5.93870 | 1.19043  |
| C | 8.11351  | 1.20385  | 0.50906 | C  | 7.80286  | -6.29130 | 1.18656  |
| C | 9.52425  | 0.96372  | 0.40855 | Cu | 7.77645  | -2.81881 | -0.98896 |
| C | 10.47892 | 1.99483  | 0.32564 | O  | 7.98465  | -4.58264 | -2.07252 |
| C | 9.99561  | 3.34211  | 0.30963 | B  | 6.71587  | -2.04254 | 0.81368  |
| C | 8.65212  | 3.61741  | 0.41761 | Cu | 5.76112  | -1.18147 | -0.98981 |
| C | 11.85538 | 1.61405  | 0.27882 | Cu | 7.29288  | -1.24115 | -2.85798 |
| C | 12.22552 | 0.28868  | 0.33946 | Cu | 8.75833  | 0.61100  | -3.38318 |

|    |          |          |          |   |          |          |          |
|----|----------|----------|----------|---|----------|----------|----------|
| Cu | 9.26391  | -0.84642 | -1.51225 | H | 13.28402 | 0.01706  | 0.31949  |
| B  | 8.70882  | -1.44798 | 0.62338  | H | 12.61807 | 2.39312  | 0.20340  |
| C  | 4.66479  | -4.24121 | 1.15141  | H | 10.71614 | 4.15941  | 0.22549  |
| Cu | 7.30194  | 0.74972  | -1.40482 | H | 8.30673  | 4.65447  | 0.42544  |
| B  | 7.17486  | -0.00716 | 0.74134  | H | 5.98954  | 3.92969  | 0.80264  |
| Cu | 5.40832  | 0.27966  | -2.89486 | H | 3.66279  | 3.23888  | 1.11711  |
| H  | 3.92575  | -5.04109 | 1.24984  | H | 1.92580  | 1.49521  | 1.31458  |
| H  | 12.72120 | -2.36641 | 0.57467  | H | 1.33469  | -1.04003 | 1.39119  |
| H  | 12.19721 | -4.73720 | 0.87889  | H | 2.12142  | -3.38146 | 1.35280  |
| H  | 8.09206  | -7.34354 | 1.24640  | H | 7.64596  | -5.32421 | -1.52951 |
| H  | 5.70234  | -6.71515 | 1.25861  | H | 7.41267  | -4.57148 | -2.86407 |
| H  | 10.57911 | -6.58418 | 1.13914  |   |          |          |          |

**d. Cu<sub>7</sub> cluster – C<sub>2</sub> pathway**

**\*CO + \*COOH + \*H<sub>2</sub>O**

|   |          |          |         |    |          |          |          |
|---|----------|----------|---------|----|----------|----------|----------|
| C | 4.99867  | -1.92330 | 1.21146 | C  | -1.37249 | 2.05623  | 1.66074  |
| C | 4.59047  | -0.57179 | 0.99045 | C  | -2.77250 | 2.33396  | 1.86077  |
| C | 3.23163  | -0.26216 | 1.18786 | C  | -3.20423 | 3.69920  | 1.77110  |
| C | 2.25775  | -1.21512 | 1.58912 | C  | -2.34844 | 4.73130  | 1.44834  |
| C | 2.69014  | -2.57582 | 1.77669 | C  | -3.68420 | 1.29629  | 2.13509  |
| C | 4.08269  | -2.87898 | 1.58635 | C  | -3.27039 | -0.04230 | 2.22585  |
| C | 5.45710  | 0.49065  | 0.57166 | C  | -4.18984 | -1.10222 | 2.55575  |
| C | 4.97837  | 1.76891  | 0.40477 | C  | -3.78195 | -2.40341 | 2.72489  |
| C | 3.59447  | 2.10557  | 0.61968 | C  | -2.40613 | -2.77307 | 2.56219  |
| C | 2.69107  | 1.03118  | 0.96115 | C  | -1.50235 | -1.76158 | 2.21333  |
| C | 3.13425  | 3.42752  | 0.50806 | C  | -1.87952 | -0.39996 | 2.02828  |
| C | 1.78822  | 3.76667  | 0.74873 | C  | -1.88391 | -4.09696 | 2.73373  |
| C | 0.83137  | 2.75456  | 1.10663 | C  | -0.54282 | -4.35130 | 2.57460  |
| C | -0.51430 | 3.14804  | 1.33829 | C  | 0.40107  | -3.31603 | 2.23827  |
| C | -0.96530 | 4.48528  | 1.20210 | C  | -0.10085 | -1.97401 | 2.04387  |
| C | 0.00753  | 5.47096  | 0.85942 | B  | 0.79971  | -0.74527 | 1.78343  |
| C | 1.32555  | 5.12235  | 0.65225 | Cu | 0.44411  | -1.57815 | -0.14822 |



|    |          |          |          |   |          |          |          |
|----|----------|----------|----------|---|----------|----------|----------|
| C  | 0.71950  | -2.46931 | -1.89453 | H | 5.65846  | 2.57129  | 0.10729  |
| O  | -0.23026 | -3.41154 | -2.18443 | H | 6.04889  | -2.19108 | 1.07092  |
| Cu | -2.59930 | -1.31729 | -2.13170 | H | 4.40542  | -3.91192 | 1.74046  |
| Cu | -0.32445 | -0.33647 | -2.08277 | H | 6.51375  | 0.27327  | 0.39748  |
| C  | -0.11369 | -0.23878 | -3.90929 | H | 2.05546  | 5.89155  | 0.38701  |
| O  | 0.00731  | -0.06663 | -5.03989 | H | -0.30776 | 6.51261  | 0.76137  |
| C  | 1.77126  | -3.58787 | 2.11410  | H | -2.72699 | 5.75361  | 1.37352  |
| Cu | -1.84583 | -0.36863 | -0.05304 | H | -4.26224 | 3.90891  | 1.94887  |
| B  | -0.76051 | 0.63263  | 1.72378  | H | -4.73864 | 1.53982  | 2.28917  |
| Cu | -0.40074 | 1.63564  | -0.37992 | H | -5.24106 | -0.83726 | 2.69393  |
| B  | 1.17118  | 1.23857  | 1.19262  | H | -4.50875 | -3.17592 | 2.98810  |
| Cu | 1.70854  | 0.59844  | -0.91730 | H | -2.57001 | -4.90494 | 2.99935  |
| O  | 3.13095  | -0.24534 | -2.10846 | H | -0.15674 | -5.36465 | 2.71227  |
| Cu | -2.22884 | 1.12770  | -1.92662 | H | 3.95414  | -0.35687 | -1.59087 |
| O  | 1.82706  | -2.54942 | -2.45042 | H | 2.76782  | -1.17547 | -2.24886 |
| H  | 2.13187  | -4.61006 | 2.25837  | H | 0.15361  | -4.04347 | -2.84079 |
| H  | 3.84202  | 4.21523  | 0.23575  |   |          |          |          |

**\*2CO + \*2H<sub>2</sub>O**

|   |          |          |         |   |          |          |         |
|---|----------|----------|---------|---|----------|----------|---------|
| C | -0.38605 | -1.91353 | 1.76481 | C | -1.86890 | 5.01957  | 1.31747 |
| C | -1.74686 | -1.54165 | 1.91255 | C | -2.83605 | 4.08690  | 1.62407 |
| C | -2.78213 | -2.46817 | 2.14270 | C | 0.56076  | 5.50328  | 0.77872 |
| C | -2.41646 | -3.84086 | 2.28538 | C | 1.84360  | 5.02575  | 0.61849 |
| C | -1.09623 | -4.23071 | 2.22052 | C | 2.16332  | 3.62937  | 0.73958 |
| C | -0.03056 | -3.29668 | 1.98400 | C | 1.07613  | 2.71033  | 0.98030 |
| C | -1.95684 | -0.12953 | 1.83254 | C | 3.49196  | 3.17130  | 0.67802 |
| C | -3.30762 | 0.36624  | 1.98543 | C | 3.82135  | 1.82169  | 0.90516 |
| C | -4.36230 | -0.60142 | 2.14731 | C | 5.18614  | 1.37281  | 0.89416 |
| C | -4.11683 | -1.95542 | 2.22681 | C | 5.53381  | 0.05702  | 1.12250 |
| C | -3.57153 | 1.74512  | 1.96997 | C | 4.53979  | -0.92668 | 1.39743 |
| C | -2.54534 | 2.68369  | 1.74642 | C | 3.18796  | -0.49317 | 1.43514 |
| C | -1.18117 | 2.26073  | 1.57427 | C | 2.79733  | 0.84779  | 1.17160 |
| C | -0.21774 | 3.24315  | 1.21536 | C | 2.08930  | -1.37697 | 1.61159 |
| C | -0.51577 | 4.62165  | 1.09657 | C | 2.36382  | -2.77851 | 1.79378 |

|    |          |          |          |   |          |          |          |
|----|----------|----------|----------|---|----------|----------|----------|
| C  | 3.73792  | -3.19983 | 1.78145  | H | 1.55869  | -4.75738 | 2.13238  |
| C  | 4.78185  | -2.31958 | 1.58502  | H | 4.29313  | 3.88920  | 0.48133  |
| B  | 0.65609  | -0.78098 | 1.52827  | H | 5.96433  | 2.11140  | 0.68468  |
| Cu | -0.24006 | -1.90961 | -0.43371 | H | 5.81117  | -2.68633 | 1.56310  |
| Cu | 1.73538  | -0.31072 | -0.44393 | H | 3.94489  | -4.26387 | 1.92331  |
| O  | 3.29359  | -1.01207 | -1.64937 | H | 6.58295  | -0.24736 | 1.08711  |
| C  | 1.31934  | -3.70141 | 1.98206  | H | 2.66104  | 5.71978  | 0.40532  |
| B  | 1.27318  | 1.16835  | 1.15101  | H | 0.35791  | 6.57261  | 0.67766  |
| Cu | 0.46240  | 1.79648  | -0.86173 | H | -2.13147 | 6.07750  | 1.23522  |
| Cu | -1.52765 | 1.84301  | -2.21623 | H | -3.87071 | 4.40817  | 1.77239  |
| Cu | -1.45854 | 0.34194  | -0.25291 | H | -4.60109 | 2.09529  | 2.08575  |
| B  | -0.72554 | 0.79431  | 1.69006  | H | -5.38683 | -0.22886 | 2.23066  |
| C  | 0.73335  | -3.27514 | -1.23710 | H | -4.94402 | -2.65433 | 2.37474  |
| O  | 1.40757  | -3.89567 | -1.93501 | H | -3.19940 | -4.58300 | 2.46180  |
| Cu | -2.34630 | -1.38129 | -1.65175 | H | -0.83140 | -5.28183 | 2.36085  |
| Cu | -0.23480 | -0.19934 | -2.24747 | H | 4.02815  | -1.30640 | -1.07184 |
| C  | 0.73761  | -0.86571 | -3.62050 | H | 3.05416  | -1.80320 | -2.16964 |
| O  | 1.39962  | -1.41929 | -4.38884 | H | -4.41635 | -1.80853 | -0.27939 |
| O  | -4.28240 | -1.95301 | -1.24317 | H | -4.43873 | -2.90910 | -1.37251 |

**\*OCCOH + \*2H<sub>2</sub>O**

|   |          |          |         |   |          |          |         |
|---|----------|----------|---------|---|----------|----------|---------|
| C | 5.11380  | 1.14462  | 1.57259 | C | -3.14937 | 4.40963  | 1.14469 |
| C | 4.02240  | 2.01263  | 1.26414 | C | -3.39772 | 3.02539  | 1.39221 |
| C | 2.72401  | 1.47146  | 1.32662 | C | -2.28327 | 2.15811  | 1.40782 |
| C | 2.45130  | 0.12751  | 1.70035 | C | -0.95342 | 2.59565  | 1.13007 |
| C | 3.57140  | -0.74155 | 1.95668 | C | -4.68345 | 2.43702  | 1.60959 |
| C | 4.89036  | -0.17437 | 1.90086 | C | -4.81117 | 1.07829  | 1.78671 |
| C | 1.55182  | 2.22549  | 1.02669 | C | -3.67885 | 0.18832  | 1.78466 |
| C | 1.69600  | 3.64613  | 0.79959 | C | -2.37129 | 0.76196  | 1.65311 |
| C | 3.03241  | 4.17458  | 0.70433 | C | -3.85543 | -1.20914 | 1.83726 |
| C | 4.14697  | 3.39666  | 0.91319 | C | -2.76384 | -2.08677 | 1.76832 |
| C | 0.57888  | 4.48841  | 0.71709 | C | -1.41085 | -1.57790 | 1.67315 |
| C | -0.72822 | 4.00138  | 0.90711 | C | -0.34009 | -2.50593 | 1.84081 |
| C | -1.87010 | 4.87224  | 0.91828 | C | -0.52308 | -3.88360 | 1.98798 |

|    |          |          |          |   |          |          |          |
|----|----------|----------|----------|---|----------|----------|----------|
| C  | -1.86946 | -4.38079 | 1.93401  | H | 3.14458  | 5.23705  | 0.47370  |
| C  | -2.93658 | -3.51673 | 1.83673  | H | 6.13229  | 1.53919  | 1.53949  |
| C  | 0.64683  | -4.68781 | 2.20419  | H | 5.73700  | -0.83150 | 2.11657  |
| C  | 1.89329  | -4.11435 | 2.28065  | H | 5.14517  | 3.83480  | 0.83692  |
| C  | 2.10178  | -2.69592 | 2.12792  | H | -1.70132 | 5.93629  | 0.73321  |
| C  | 0.93525  | -1.86920 | 1.88345  | H | -3.99329 | 5.10373  | 1.13162  |
| B  | 0.98050  | -0.33142 | 1.75403  | H | -5.56789 | 3.07896  | 1.60895  |
| Cu | 1.29603  | 1.19385  | -0.86305 | H | -5.80377 | 0.63744  | 1.91142  |
| Cu | -0.26943 | 0.05290  | -2.39671 | H | -4.86700 | -1.61739 | 1.91202  |
| Cu | 1.34129  | -1.29209 | -0.14668 | H | -3.95764 | -3.90598 | 1.84268  |
| Cu | -0.10128 | -2.47467 | -1.85258 | H | -2.03970 | -5.45776 | 2.00479  |
| O  | -1.66276 | -3.64878 | -1.54105 | H | 0.53110  | -5.76807 | 2.32188  |
| C  | 3.37898  | -2.11960 | 2.19643  | H | 2.77156  | -4.73968 | 2.46059  |
| Cu | -1.34302 | -0.90104 | -0.35719 | H | 3.43117  | 2.65123  | -1.49442 |
| B  | -1.06264 | -0.06395 | 1.62106  | H | 2.83176  | 1.73694  | -2.65713 |
| Cu | -1.19982 | 1.49876  | -0.63589 | H | -2.50137 | -3.29776 | -1.90454 |
| Cu | -2.65694 | 0.19205  | -2.09271 | H | -1.85261 | -3.83836 | -0.59466 |
| B  | 0.17798  | 1.51519  | 1.15273  | O | 2.59490  | -2.48551 | -2.65257 |
| C  | 1.63651  | -1.61418 | -2.08949 | C | 1.70047  | -0.25727 | -2.53485 |
| O  | 2.62145  | 2.48872  | -2.01517 | O | 2.60986  | 0.22553  | -3.30387 |
| H  | 4.24776  | -2.75647 | 2.38247  | H | 2.55948  | -3.32546 | -2.15944 |
| H  | 0.72990  | 5.55693  | 0.54040  |   |          |          |          |

**\*CCO + \*3H<sub>2</sub>O**

|   |          |          |         |   |          |         |         |
|---|----------|----------|---------|---|----------|---------|---------|
| C | -0.46440 | -1.94452 | 1.67685 | C | -3.28668 | 1.98835 | 1.90865 |
| C | -1.80258 | -1.46202 | 1.76043 | C | -2.16452 | 2.82635 | 1.76688 |
| C | -2.91866 | -2.28867 | 1.97040 | C | -0.84845 | 2.27826 | 1.55965 |
| C | -2.67894 | -3.69376 | 2.10830 | C | 0.21666  | 3.18970 | 1.29745 |
| C | -1.39814 | -4.19745 | 2.08374 | C | 0.06428  | 4.60283 | 1.29508 |
| C | -0.24123 | -3.36052 | 1.89408 | C | -1.23857 | 5.11140 | 1.56881 |
| C | -1.87852 | -0.04078 | 1.66316 | C | -2.30016 | 4.25816 | 1.78850 |
| C | -3.17411 | 0.58877  | 1.83782 | C | 1.22389  | 5.37979 | 1.01607 |
| C | -4.31761 | -0.27774 | 1.98395 | C | 2.43929  | 4.77618 | 0.75395 |
| C | -4.20019 | -1.65149 | 2.04965 | C | 2.60706  | 3.35074 | 0.74154 |

|    |          |          |          |    |          |          |          |
|----|----------|----------|----------|----|----------|----------|----------|
| C  | 1.44521  | 2.54239  | 1.00283  | Cu | 0.04447  | -1.68896 | -0.37821 |
| C  | 3.86409  | 2.74941  | 0.53171  | Cu | -2.16694 | -1.80650 | -1.82912 |
| C  | 4.05051  | 1.35818  | 0.64744  | O  | -4.04146 | -1.38179 | -1.21103 |
| C  | 5.35269  | 0.76026  | 0.52883  | H  | 1.20811  | -4.94851 | 2.09275  |
| C  | 5.57058  | -0.58611 | 0.73835  | H  | 4.73035  | 3.38454  | 0.32634  |
| C  | 4.49936  | -1.45397 | 1.10809  | H  | 6.19246  | 1.41262  | 0.27462  |
| C  | 3.20594  | -0.88425 | 1.20321  | H  | 5.61050  | -3.31460 | 1.31939  |
| C  | 2.94009  | 0.48116  | 0.92457  | H  | 3.61686  | -4.68327 | 1.84782  |
| C  | 2.04201  | -1.63511 | 1.51491  | H  | 6.57731  | -1.00015 | 0.63712  |
| C  | 2.18594  | -3.05045 | 1.71992  | H  | 3.31844  | 5.39396  | 0.55205  |
| C  | 3.51038  | -3.61049 | 1.66505  | H  | 1.14271  | 6.46984  | 1.01139  |
| C  | 4.62202  | -2.85049 | 1.36884  | H  | -1.39319 | 6.19340  | 1.58750  |
| B  | 0.67835  | -0.90465 | 1.53291  | H  | -3.29649 | 4.66996  | 1.97039  |
| B  | -0.54116 | 0.75403  | 1.51422  | H  | -4.27367 | 2.43664  | 2.05067  |
| Cu | 0.13755  | 1.79439  | -0.56242 | H  | -5.30200 | 0.18786  | 2.07599  |
| Cu | 1.86262  | 0.05595  | -0.91248 | H  | -5.09252 | -2.26840 | 2.18239  |
| O  | 3.26043  | -0.81302 | -2.14778 | H  | -3.53030 | -4.36294 | 2.25660  |
| C  | 1.06153  | -3.87682 | 1.93167  | H  | -1.23279 | -5.26918 | 2.22291  |
| B  | 1.45719  | 0.97188  | 1.01196  | H  | 4.08367  | -0.95920 | -1.63699 |
| Cu | -1.78317 | 0.32013  | -0.37655 | H  | 2.96527  | -1.70617 | -2.41376 |
| Cu | -1.65451 | 1.96484  | -2.19506 | H  | -4.37449 | -0.53129 | -1.56111 |
| Cu | -0.26734 | -0.00272 | -2.24527 | H  | -4.15885 | -1.31429 | -0.23405 |
| C  | -0.29012 | -1.95544 | -2.29679 | O  | -2.97827 | -3.65180 | -2.78778 |
| C  | 0.35699  | -2.76603 | -3.07710 | H  | -3.51208 | -4.13711 | -2.13013 |
| O  | 0.97285  | -3.50060 | -3.79845 | H  | -2.18753 | -4.20864 | -2.92033 |

**\*CHCO + \*3H<sub>2</sub>O**

|   |         |          |         |   |         |          |         |
|---|---------|----------|---------|---|---------|----------|---------|
| C | 4.49572 | -3.00475 | 1.47587 | C | 4.06438 | 1.21094  | 0.69929 |
| C | 4.43535 | -1.59187 | 1.27516 | C | 5.36519 | 0.59226  | 0.70196 |
| C | 3.15651 | -0.99438 | 1.29245 | C | 5.54814 | -0.74327 | 0.97891 |
| C | 1.95272 | -1.72725 | 1.47797 | C | 3.90766 | 2.58478  | 0.45035 |
| C | 2.03736 | -3.15429 | 1.63951 | C | 2.65312 | 3.21524  | 0.54129 |
| C | 3.34675 | -3.74773 | 1.64569 | C | 2.51818 | 4.64374  | 0.44205 |
| C | 2.92758 | 0.37909  | 0.99732 | C | 1.32257 | 5.28711  | 0.67031 |

|    |          |          |          |    |          |          |          |
|----|----------|----------|----------|----|----------|----------|----------|
| C  | 0.14902  | 4.55323  | 1.03171  | Cu | -1.26005 | 1.95096  | -2.37000 |
| C  | 0.25647  | 3.15040  | 1.10600  | B  | 1.46092  | 0.89663  | 1.00709  |
| C  | 1.46031  | 2.44717  | 0.81542  | Cu | 1.71787  | -0.61165 | -0.63405 |
| C  | -1.12021 | 5.13334  | 1.34527  | O  | 3.26219  | -1.47686 | -1.79049 |
| C  | -2.18970 | 4.33969  | 1.69320  | C  | -1.02389 | -2.26177 | -2.31311 |
| C  | -2.09147 | 2.90678  | 1.76935  | H  | 0.97329  | -5.02519 | 1.87582  |
| C  | -0.81166 | 2.29980  | 1.50594  | H  | 4.79274  | 3.19064  | 0.23723  |
| C  | -3.22497 | 2.11255  | 2.03097  | H  | 6.22870  | 1.22258  | 0.47349  |
| C  | -3.15467 | 0.71269  | 1.99398  | H  | 5.47131  | -3.49788 | 1.47361  |
| C  | -1.88875 | 0.04343  | 1.77191  | H  | 3.41584  | -4.83052 | 1.77904  |
| C  | -1.87656 | -1.38324 | 1.81776  | H  | 6.55224  | -1.17484 | 0.95860  |
| C  | -3.02089 | -2.16773 | 2.01652  | H  | 3.41256  | 5.22372  | 0.20007  |
| C  | -4.27354 | -1.48368 | 2.15267  | H  | 1.26238  | 6.37586  | 0.59557  |
| C  | -4.33096 | -0.10693 | 2.15078  | H  | -1.23280 | 6.21958  | 1.30033  |
| C  | -2.84752 | -3.59007 | 2.06675  | H  | -3.15842 | 4.79577  | 1.91384  |
| C  | -1.59909 | -4.15652 | 1.95946  | H  | -4.18887 | 2.59712  | 2.20850  |
| C  | -0.40640 | -3.36481 | 1.78244  | H  | -5.28989 | 0.39961  | 2.28640  |
| C  | -0.57064 | -1.92931 | 1.65532  | H  | -5.18698 | -2.07035 | 2.27891  |
| B  | 0.61310  | -0.94678 | 1.42640  | H  | -3.72804 | -4.22330 | 2.20007  |
| Cu | -0.43051 | -1.93830 | -0.37729 | H  | -1.48376 | -5.24137 | 2.02529  |
| Cu | -2.51992 | -1.18088 | -1.65679 | H  | 3.77502  | -2.07661 | -1.21392 |
| O  | -4.18192 | -0.14428 | -1.14093 | H  | 2.66872  | -2.07601 | -2.34649 |
| C  | 0.87562  | -3.94133 | 1.77120  | H  | -4.07724 | 0.82715  | -1.19234 |
| B  | -0.53853 | 0.78272  | 1.61026  | H  | -4.41861 | -0.31929 | -0.19928 |
| Cu | -1.41666 | 0.69487  | -0.31162 | H  | -1.52787 | -3.11347 | -2.80507 |
| Cu | -0.19677 | -0.19931 | -2.26866 | O  | -3.82828 | -3.02470 | -1.12486 |
| C  | 0.34496  | -2.10639 | -2.47021 | H  | -3.15964 | -3.59244 | -0.69341 |
| O  | 1.30491  | -2.74523 | -2.97802 | H  | -4.39895 | -2.74122 | -0.38439 |
| Cu | 0.76578  | 1.64839  | -1.01849 |    |          |          |          |

**\*CHCHO + \*3H<sub>2</sub>O**

|   |          |          |         |   |          |          |         |
|---|----------|----------|---------|---|----------|----------|---------|
| C | -0.48364 | -1.85862 | 1.60168 | C | -2.78344 | -3.45657 | 2.15268 |
| C | -1.77159 | -1.28405 | 1.79670 | C | -1.55513 | -4.05479 | 1.97095 |
| C | -2.92912 | -2.03619 | 2.06388 | C | -0.35870 | -3.29579 | 1.71311 |

|    |          |          |          |    |          |          |          |
|----|----------|----------|----------|----|----------|----------|----------|
| C  | -4.16200 | -1.32199 | 2.19724  | C  | 0.90051  | -3.91304 | 1.61081  |
| C  | -4.20048 | 0.05408  | 2.11019  | B  | 1.62906  | 0.92446  | 0.95907  |
| C  | -3.01589 | 0.84651  | 1.88993  | Cu | 0.36279  | 1.73926  | -0.65356 |
| C  | -1.76487 | 0.13946  | 1.69137  | Cu | -1.47396 | 2.05531  | -2.23230 |
| C  | -3.04830 | 2.25173  | 1.89165  | Cu | -0.15085 | 0.03698  | -2.25270 |
| C  | -1.88797 | 3.01589  | 1.66284  | Cu | -1.69839 | 0.42846  | -0.39894 |
| C  | -1.94199 | 4.45160  | 1.61020  | B  | -0.40205 | 0.85057  | 1.47475  |
| C  | -0.84001 | 5.22879  | 1.32027  | Cu | -2.68173 | -1.64280 | -1.61248 |
| C  | 0.42659  | 4.63332  | 1.05134  | O  | -4.34565 | -0.60379 | -1.19312 |
| C  | 0.49907  | 3.21577  | 1.11751  | H  | 0.96896  | -5.00143 | 1.68703  |
| C  | -0.61148 | 2.38424  | 1.44657  | H  | 5.02723  | 3.13466  | 0.21521  |
| C  | 1.69142  | 2.48643  | 0.85715  | H  | 6.38757  | 1.09895  | 0.26936  |
| C  | 2.89761  | 3.22069  | 0.57563  | H  | 5.47018  | -3.64431 | 0.96100  |
| C  | 2.80673  | 4.65216  | 0.51182  | H  | 3.38121  | -4.89974 | 1.36172  |
| C  | 1.62565  | 5.33205  | 0.73394  | H  | 6.62211  | -1.34318 | 0.55186  |
| C  | 4.12661  | 2.55170  | 0.42692  | H  | 3.71975  | 5.20986  | 0.28744  |
| C  | 4.23751  | 1.15741  | 0.58517  | H  | 1.60256  | 6.42319  | 0.67504  |
| C  | 3.08075  | 0.35304  | 0.87187  | H  | -0.93202 | 6.31744  | 1.28668  |
| C  | 3.25528  | -1.03900 | 1.07869  | H  | -2.90640 | 4.93028  | 1.79990  |
| C  | 4.51068  | -1.69050 | 0.94370  | H  | -4.00106 | 2.76356  | 2.05055  |
| C  | 5.64036  | -0.87356 | 0.65336  | H  | -5.14947 | 0.58146  | 2.23546  |
| C  | 5.50640  | 0.49019  | 0.48874  | H  | -5.08208 | -1.88370 | 2.37712  |
| C  | 2.03602  | -1.72870 | 1.31588  | H  | -3.66659 | -4.06687 | 2.35697  |
| C  | 2.07559  | -3.16230 | 1.41139  | H  | -1.46145 | -5.14091 | 2.04796  |
| C  | 3.35362  | -3.80965 | 1.28427  | H  | 3.11405  | -2.45275 | -1.49998 |
| C  | 4.52189  | -3.11036 | 1.06280  | H  | 2.12105  | -2.13258 | -2.67548 |
| Cu | 1.78381  | -0.43275 | -0.73429 | H  | -4.33341 | 0.33771  | -1.45808 |
| O  | 2.76721  | -1.71084 | -2.03506 | H  | -4.56719 | -0.60006 | -0.23345 |
| B  | 0.72042  | -0.90178 | 1.35067  | H  | -0.98148 | -3.62272 | -1.92344 |
| Cu | -0.35562 | -1.72492 | -0.49498 | H  | -0.41705 | -1.07403 | -3.64512 |
| C  | -1.09109 | -2.55110 | -2.18152 | O  | -3.87338 | -3.48649 | -0.80078 |
| C  | -0.17264 | -2.10736 | -3.15329 | H  | -3.23317 | -3.80760 | -0.13214 |
| O  | 0.81765  | -2.71458 | -3.67679 | H  | -4.58730 | -3.09915 | -0.25863 |

**\*CH<sub>2</sub>CHO + \*3H<sub>2</sub>O**

|   |          |          |          |    |          |          |          |
|---|----------|----------|----------|----|----------|----------|----------|
| C | -1.19049 | 5.36700  | -1.26697 | Cu | -1.73380 | 0.12776  | 0.36154  |
| C | 0.10247  | 4.80486  | -1.04916 | Cu | -2.19574 | -2.17104 | 1.09694  |
| C | 0.21806  | 3.39600  | -1.14655 | O  | -1.29626 | -3.99565 | 0.98181  |
| C | -0.88240 | 2.53671  | -1.41896 | C  | -3.31106 | 2.33085  | -1.87046 |
| C | -2.17710 | 3.13061  | -1.61761 | Cu | 0.20561  | -1.59033 | 0.31994  |
| C | -2.27754 | 4.56270  | -1.54189 | B  | 0.57237  | -0.68988 | -1.55872 |
| C | 1.27642  | 5.53021  | -0.68358 | B  | 1.38206  | 1.14231  | -0.88468 |
| C | 2.46030  | 4.88048  | -0.40616 | Cu | 1.77753  | 0.14893  | 1.11573  |
| C | 2.58443  | 3.44777  | -0.45237 | Cu | -0.26353 | -0.10675 | 2.27386  |
| C | 1.41500  | 2.69546  | -0.83029 | Cu | 1.34936  | -1.93541 | 2.41486  |
| C | 3.80142  | 2.80036  | -0.16442 | Cu | 0.00629  | 1.86520  | 0.71129  |
| C | 3.94468  | 1.40633  | -0.27458 | O  | -1.03284 | 3.37208  | 1.77101  |
| C | 2.81545  | 0.57151  | -0.62730 | O  | -3.32454 | 1.87727  | 1.84660  |
| C | 3.04239  | -0.81135 | -0.88563 | C  | -2.94980 | 0.73123  | 2.22645  |
| C | 4.30329  | -1.42551 | -0.74371 | C  | -3.34564 | -0.53888 | 1.62778  |
| C | 5.38866  | -0.59809 | -0.31923 | H  | -4.27860 | 2.81587  | -2.02723 |
| C | 5.21378  | 0.75039  | -0.09755 | H  | 4.67199  | 3.40262  | 0.10997  |
| C | 1.87770  | -1.49970 | -1.34989 | H  | 3.34473  | 5.46007  | -0.12784 |
| C | 2.00354  | -2.90831 | -1.64955 | H  | -1.31470 | 6.45130  | -1.20089 |
| C | 3.29067  | -3.52802 | -1.46370 | H  | -3.26162 | 5.01335  | -1.69580 |
| C | 4.39160  | -2.82176 | -1.03511 | H  | 1.22206  | 6.62009  | -0.61369 |
| C | 0.89048  | -3.65507 | -2.07589 | H  | 6.06656  | 1.36552  | 0.20267  |
| C | -0.38839 | -3.08077 | -2.15452 | H  | 6.37450  | -1.05019 | -0.18109 |
| C | -1.54576 | -3.86249 | -2.50743 | H  | 5.35412  | -3.32575 | -0.91355 |
| C | -2.79930 | -3.30261 | -2.63226 | H  | 3.37679  | -4.59562 | -1.68209 |
| C | -3.01343 | -1.90873 | -2.39227 | H  | 1.01189  | -4.71970 | -2.29401 |
| C | -1.90418 | -1.14256 | -1.99110 | H  | -1.40010 | -4.92706 | -2.70858 |
| C | -0.58434 | -1.67579 | -1.86385 | H  | -3.64972 | -3.92559 | -2.92285 |
| C | -4.27150 | -1.23416 | -2.50168 | H  | -5.15933 | -1.81028 | -2.77598 |
| C | -4.36790 | 0.12242  | -2.28969 | H  | -5.33199 | 0.62385  | -2.40902 |
| C | -3.22790 | 0.93400  | -1.94895 | H  | -1.17463 | 4.12304  | 1.15789  |
| C | -1.96880 | 0.25410  | -1.72797 | H  | -1.93717 | 2.95482  | 1.87852  |
| B | -0.64421 | 1.00236  | -1.38181 | H  | -0.37113 | -4.00774 | 1.31211  |

|   |          |          |         |   |          |          |          |
|---|----------|----------|---------|---|----------|----------|----------|
| H | -1.23778 | -4.29675 | 0.04723 | O | -4.01168 | -3.24828 | 0.35916  |
| H | -4.21108 | -0.48320 | 0.95225 | H | -4.53097 | -2.57559 | -0.12360 |
| H | -2.34768 | 0.64728  | 3.16660 | H | -3.69061 | -3.84147 | -0.34967 |
| H | -3.47520 | -1.29035 | 2.43944 |   |          |          |          |

**\*CH<sub>2</sub>CH<sub>2</sub>O + \*3H<sub>2</sub>O**

|   |          |          |          |    |          |          |          |
|---|----------|----------|----------|----|----------|----------|----------|
| C | 1.10788  | -1.44763 | -1.72278 | C  | -1.22426 | -2.41364 | -1.44785 |
| C | 2.01450  | -0.36463 | -1.92556 | C  | -0.66425 | -3.71587 | -1.67777 |
| C | 3.36675  | -0.53535 | -2.26468 | C  | -1.54826 | -4.84955 | -1.61290 |
| C | 3.84939  | -1.87804 | -2.38926 | C  | -2.88878 | -4.72834 | -1.31218 |
| C | 2.99988  | -2.95150 | -2.24228 | Cu | -1.65543 | -1.06815 | 0.87284  |
| C | 1.59771  | -2.79373 | -1.95238 | O  | -1.64605 | -2.62092 | 2.20125  |
| C | 1.39427  | 0.91201  | -1.77592 | B  | -0.38640 | -1.10675 | -1.43812 |
| C | 2.19594  | 2.09688  | -2.01955 | Cu | 0.80717  | -1.59363 | 0.33422  |
| C | 3.58684  | 1.90288  | -2.34399 | O  | 0.86927  | -1.99949 | 2.29866  |
| C | 4.14782  | 0.64653  | -2.46319 | C  | 2.19229  | -2.30480 | 2.79424  |
| C | 1.62221  | 3.37542  | -1.94075 | C  | 3.27485  | -1.82628 | 1.84860  |
| C | 0.27057  | 3.55590  | -1.59156 | Cu | 3.37188  | 0.04859  | 1.35970  |
| C | -0.59448 | 2.42927  | -1.35461 | Cu | 0.32688  | -0.08833 | 2.24907  |
| C | -1.93059 | 2.69438  | -0.93539 | Cu | 0.61173  | 2.28411  | 2.26908  |
| C | -2.46742 | 4.00237  | -0.79198 | Cu | -1.06655 | 1.34948  | 0.77029  |
| C | -1.59460 | 5.09382  | -1.06930 | B  | -1.95507 | 0.13573  | -0.86471 |
| C | -0.28692 | 4.87419  | -1.44833 | C  | 0.71458  | -3.88589 | -1.92871 |
| C | -3.83297 | 4.10442  | -0.40429 | B  | -0.13042 | 0.95139  | -1.46373 |
| C | -4.59880 | 2.97448  | -0.19346 | Cu | 1.29265  | 0.96509  | 0.31224  |
| C | -4.07135 | 1.64658  | -0.33439 | O  | 4.05951  | 1.84117  | 0.80417  |
| C | -2.67930 | 1.51573  | -0.67768 | H  | 1.10611  | -4.89277 | -2.09766 |
| C | -4.89184 | 0.50877  | -0.21390 | H  | -5.94831 | 0.64184  | 0.03626  |
| C | -4.40562 | -0.79023 | -0.45959 | H  | -6.31824 | -1.77501 | -0.14640 |
| C | -5.26992 | -1.93743 | -0.41115 | H  | -3.52379 | -5.61695 | -1.26454 |
| C | -4.82026 | -3.21392 | -0.68249 | H  | -1.12094 | -5.83873 | -1.79882 |
| C | -3.46242 | -3.45128 | -1.04339 | H  | -5.50776 | -4.06168 | -0.62219 |
| C | -2.60132 | -2.32578 | -1.11760 | H  | -5.65311 | 3.07801  | 0.07716  |
| C | -3.02302 | -1.00860 | -0.79646 | H  | -4.27816 | 5.09587  | -0.28688 |



|   |          |          |          |   |         |          |          |
|---|----------|----------|----------|---|---------|----------|----------|
| H | -1.97398 | 6.11459  | -0.97457 | H | 3.51244 | 2.60855  | 1.06947  |
| H | 0.36931  | 5.72588  | -1.64634 | H | 4.11269 | 1.89293  | -0.18165 |
| H | 2.24811  | 4.25350  | -2.12050 | H | 3.25544 | -2.43610 | 0.92161  |
| H | 4.19759  | 2.79147  | -2.52374 | H | 2.31375 | -1.85744 | 3.79487  |
| H | 5.20656  | 0.54599  | -2.71864 | H | 4.27035 | -1.99041 | 2.31125  |
| H | 4.90451  | -2.04183 | -2.62187 | H | 2.23666 | -3.40628 | 2.90735  |
| H | 3.38142  | -3.96797 | -2.36995 | O | 6.00047 | -0.69202 | 0.04180  |
| H | -1.83590 | -3.45070 | 1.72101  | H | 5.28992 | -1.34191 | -0.11799 |
| H | -0.65198 | -2.64134 | 2.40446  | H | 5.74556 | 0.05807  | -0.52749 |

**\*CH<sub>3</sub>CH<sub>2</sub>O + \*3H<sub>2</sub>O**

|   |          |          |          |    |          |          |          |
|---|----------|----------|----------|----|----------|----------|----------|
| C | 4.73862  | -3.02640 | 0.49752  | C  | -1.52455 | -0.15353 | 2.18978  |
| C | 4.62043  | -1.60646 | 0.40686  | C  | -1.47148 | -1.57993 | 2.16084  |
| C | 3.37894  | -1.03359 | 0.75243  | C  | -2.53654 | -2.40585 | 2.54390  |
| C | 2.25750  | -1.79623 | 1.17642  | C  | -3.75483 | -1.76478 | 2.94389  |
| C | 2.39314  | -3.22768 | 1.22760  | C  | -3.85725 | -0.39117 | 2.97603  |
| C | 3.66925  | -3.80025 | 0.89238  | C  | -2.32352 | -3.82300 | 2.50065  |
| C | 3.11377  | 0.36103  | 0.64557  | C  | -1.09962 | -4.34557 | 2.15596  |
| C | 4.19492  | 1.24894  | 0.27658  | C  | 0.02621  | -3.51279 | 1.81254  |
| C | 5.45573  | 0.64236  | -0.07153 | C  | -0.18947 | -2.07685 | 1.75945  |
| C | 5.65950  | -0.71687 | -0.01854 | B  | 0.94224  | -1.04823 | 1.49510  |
| C | 4.02119  | 2.64224  | 0.28250  | Cu | 0.04599  | -1.76479 | -0.31320 |
| C | 2.81572  | 3.23943  | 0.71182  | Cu | -1.78092 | 0.11747  | 0.16730  |
| C | 2.65929  | 4.66487  | 0.78213  | B  | -0.24705 | 0.63969  | 1.79662  |
| C | 1.48859  | 5.26518  | 1.20170  | Cu | 0.07891  | 1.71411  | -0.29177 |
| C | 0.36890  | 4.48320  | 1.60862  | B  | 1.70076  | 0.87430  | 1.03439  |
| C | 0.51997  | 3.07197  | 1.57203  | Cu | 1.77974  | 0.19167  | -1.04894 |
| C | 1.70241  | 2.42967  | 1.12421  | Cu | -0.55666 | -0.00341 | -1.96215 |
| C | -0.87854 | 4.99187  | 2.07612  | Cu | -2.09767 | 1.76654  | -1.56891 |
| C | -1.89348 | 4.14013  | 2.45877  | Cu | -3.58600 | -0.11513 | -1.39173 |
| C | -1.77002 | 2.70988  | 2.39158  | O  | -4.51837 | -1.68336 | -0.22161 |
| C | -0.51550 | 2.16145  | 1.93997  | C  | 1.29471  | -4.05090 | 1.56007  |
| C | -2.84164 | 1.86921  | 2.75140  | O  | 2.47861  | -1.14458 | -2.46532 |
| C | -2.75244 | 0.47464  | 2.63938  | O  | -0.03063 | -1.91963 | -2.26997 |

|   |          |          |          |   |          |          |          |
|---|----------|----------|----------|---|----------|----------|----------|
| C | -0.82657 | -2.95678 | -2.87333 | H | -3.14831 | -4.48887 | 2.76701  |
| C | -2.17928 | -3.10931 | -2.21178 | H | -0.94916 | -5.42831 | 2.15555  |
| H | 1.43140  | -5.13529 | 1.59433  | H | 3.10466  | -1.76571 | -2.04179 |
| H | 4.85627  | 3.28381  | -0.01262 | H | 1.60587  | -1.65080 | -2.55376 |
| H | 6.27125  | 1.30258  | -0.37946 | H | -4.45794 | -1.39545 | 0.71668  |
| H | 5.69185  | -3.49672 | 0.24109  | H | -3.91807 | -2.45484 | -0.25525 |
| H | 3.77074  | -4.88754 | 0.94398  | H | -2.06219 | -3.31632 | -1.13176 |
| H | 6.63156  | -1.13516 | -0.29404 | H | -0.95202 | -2.71697 | -3.94290 |
| H | 3.50623  | 5.28663  | 0.47878  | H | -2.74566 | -3.93607 | -2.66873 |
| H | 1.41138  | 6.35530  | 1.22916  | H | -0.26100 | -3.90176 | -2.79380 |
| H | -1.02245 | 6.07425  | 2.13090  | H | -2.76295 | -2.17849 | -2.32910 |
| H | -2.84169 | 4.55185  | 2.81487  | O | -5.11554 | -0.21447 | -2.82322 |
| H | -3.77902 | 2.31731  | 3.09235  | H | -5.35847 | 0.67177  | -3.15229 |
| H | -4.79088 | 0.07745  | 3.29808  | H | -5.93111 | -0.55967 | -2.41025 |
| H | -4.61103 | -2.38265 | 3.22659  |   |          |          |          |

**\*CH<sub>3</sub>CH<sub>2</sub>OH + \*3H<sub>2</sub>O**

|   |          |          |         |    |          |          |          |
|---|----------|----------|---------|----|----------|----------|----------|
| C | -0.32848 | -1.74639 | 1.76444 | C  | 1.93617  | 2.57206  | 1.01560  |
| C | -1.55835 | -1.13471 | 2.15102 | C  | 3.11183  | 3.27662  | 0.58142  |
| C | -2.69401 | -1.85448 | 2.54814 | C  | 3.09287  | 4.71028  | 0.67012  |
| C | -2.60700 | -3.28669 | 2.52075 | C  | 2.00358  | 5.41107  | 1.14761  |
| C | -1.43280 | -3.91601 | 2.18152 | C  | 4.24429  | 2.57206  | 0.12171  |
| C | -0.23827 | -3.18826 | 1.83047 | C  | 4.29336  | 1.16882  | 0.13452  |
| C | -3.84347 | -1.10267 | 2.95747 | C  | 3.15085  | 0.38478  | 0.55066  |
| C | -3.81344 | 0.27324  | 2.99932 | C  | 3.30093  | -1.02428 | 0.69344  |
| C | -2.64358 | 1.02989  | 2.63283 | C  | 4.48127  | -1.70822 | 0.33165  |
| C | -1.49241 | 0.29386  | 2.15276 | C  | 5.57675  | -0.92001 | -0.15335 |
| C | -2.59530 | 2.42763  | 2.75717 | C  | 5.48626  | 0.44976  | -0.23704 |
| C | -1.45802 | 3.16406  | 2.38405 | C  | 2.12761  | -1.68075 | 1.15383  |
| C | -1.44675 | 4.60273  | 2.46383 | C  | 2.13836  | -3.11839 | 1.22618  |
| C | -0.35927 | 5.35561  | 2.08200 | C  | 3.35889  | -3.80257 | 0.88838  |
| C | 0.82822  | 4.73328  | 1.58678 | C  | 4.48143  | -3.13278 | 0.45614  |
| C | 0.83737  | 3.31992  | 1.51897 | B  | 0.87988  | -0.82564 | 1.46135  |
| C | -0.27149 | 2.50529  | 1.90133 | Cu | -0.06903 | -1.36243 | -0.39590 |

|    |          |          |          |   |          |          |          |
|----|----------|----------|----------|---|----------|----------|----------|
| O  | 0.46572  | -2.89527 | -1.73761 | H | 3.98337  | 5.25365  | 0.34156  |
| C  | -0.60889 | -3.22263 | -2.66375 | H | 2.03258  | 6.50311  | 1.19178  |
| C  | -1.81381 | -3.62836 | -1.84762 | H | -0.39610 | 6.44623  | 2.14978  |
| C  | 0.97692  | -3.83920 | 1.57510  | H | -2.34831 | 5.09744  | 2.83499  |
| B  | 1.79682  | 1.02237  | 0.95341  | H | -3.47814 | 2.95956  | 3.12296  |
| Cu | 1.79045  | 0.19050  | -1.15371 | H | -4.69120 | 0.82744  | 3.34199  |
| O  | 2.76500  | -1.27398 | -2.32660 | H | -4.74829 | -1.64008 | 3.25310  |
| Cu | 0.28968  | 1.98444  | -0.36566 | H | -3.48727 | -3.87424 | 2.79332  |
| Cu | -1.96780 | 2.20980  | -1.57091 | H | -1.37769 | -5.00788 | 2.19435  |
| Cu | -2.85714 | -0.11099 | -1.87757 | H | 3.04383  | -0.96270 | -3.20895 |
| O  | -4.28438 | -1.38977 | -2.49972 | H | 3.58484  | -1.57478 | -1.87528 |
| B  | -0.14926 | 0.96662  | 1.74537  | H | -4.32499 | -1.83471 | 0.46362  |
| Cu | -1.67225 | 0.50517  | 0.09483  | H | -4.03362 | -3.24468 | -0.05824 |
| Cu | -0.44323 | 0.39523  | -2.06855 | H | -1.58131 | -4.48958 | -1.20288 |
| O  | -4.69092 | -2.52546 | -0.12545 | H | -0.83173 | -2.33404 | -3.28077 |
| H  | 1.02013  | -4.93098 | 1.62017  | H | -2.64690 | -3.89844 | -2.51299 |
| H  | 5.12549  | 3.13302  | -0.20258 | H | -0.26840 | -4.03951 | -3.31974 |
| H  | 6.34341  | 1.03090  | -0.58819 | H | -2.14643 | -2.78701 | -1.21062 |
| H  | 5.38568  | -3.68749 | 0.19122  | H | -5.10429 | -0.93151 | -2.76751 |
| H  | 3.37074  | -4.89331 | 0.96333  | H | -4.51516 | -1.88643 | -1.64371 |
| H  | 6.49892  | -1.42760 | -0.44948 | H | 1.21292  | -2.48192 | -2.23243 |

**\*3H<sub>2</sub>O (ethanol pathway)**

|   |          |          |         |   |          |          |         |
|---|----------|----------|---------|---|----------|----------|---------|
| C | -0.29310 | -1.66886 | 1.79134 | C | -6.34647 | -0.36094 | 3.93839 |
| C | -1.50810 | -1.06258 | 2.22656 | C | -6.22271 | -1.79204 | 3.84431 |
| C | -2.57418 | -1.92842 | 2.58501 | C | -7.26537 | -2.59599 | 4.37817 |
| C | -2.49683 | -3.34299 | 2.48398 | C | -8.44794 | -2.05698 | 4.94403 |
| C | -1.26909 | -3.92767 | 2.01566 | C | -8.55873 | -0.63686 | 4.99778 |
| C | -0.18303 | -3.03996 | 1.69587 | C | -7.54875 | 0.17094  | 4.51691 |
| C | -1.75595 | 0.33955  | 2.29407 | C | -7.01832 | -3.99163 | 4.25705 |
| C | -2.98406 | 0.82282  | 2.69840 | C | -8.04108 | -4.90129 | 4.69580 |
| C | -4.07180 | -0.04325 | 3.06291 | C | -9.22687 | -4.34367 | 5.28791 |
| C | -3.85910 | -1.46157 | 2.97048 | C | -9.42670 | -2.98482 | 5.41022 |
| C | -5.29695 | 0.47785  | 3.52007 | C | -7.89331 | -6.29231 | 4.52717 |

|    |          |          |          |   |           |          |          |
|----|----------|----------|----------|---|-----------|----------|----------|
| C  | -6.76230 | -6.84075 | 3.89968  | O | -5.72442  | -9.73631 | 0.17669  |
| C  | -6.59002 | -8.26558 | 3.76041  | H | -0.18785  | -5.73205 | 1.50803  |
| C  | -5.42977 | -8.82505 | 3.27524  | H | -5.42039  | 1.56221  | 3.59063  |
| C  | -4.32969 | -8.00644 | 2.86068  | H | -3.15177  | 1.90186  | 2.75124  |
| C  | -4.49453 | -6.61129 | 2.93864  | H | 0.55129   | -1.03020 | 1.51951  |
| C  | -5.69187 | -5.98406 | 3.42067  | H | 0.75355   | -3.48576 | 1.34987  |
| C  | -3.07687 | -8.49402 | 2.37586  | H | -0.95759  | 1.03316  | 2.01787  |
| C  | -2.06368 | -7.62556 | 2.03113  | H | -7.64688  | 1.25813  | 4.57743  |
| C  | -2.19933 | -6.19827 | 2.15210  | H | -9.45857  | -0.19123 | 5.42961  |
| C  | -3.47169 | -5.68255 | 2.60760  | H | -10.34695 | -2.60413 | 5.86090  |
| B  | -3.76926 | -4.16873 | 2.80487  | H | -9.99521  | -5.03783 | 5.63902  |
| Cu | -4.36987 | -5.12527 | 0.78941  | H | -8.68420  | -6.96071 | 4.87826  |
| Cu | -6.15147 | -3.82172 | -0.12784 | H | -7.40643  | -8.91047 | 4.09591  |
| Cu | -6.69395 | -5.34321 | 1.67803  | H | -5.33240  | -9.91212 | 3.21074  |
| B  | -5.69878 | -4.43989 | 3.58158  | H | -2.93115  | -9.57329 | 2.28067  |
| Cu | -6.78075 | -2.87580 | 2.04851  | H | -1.10997  | -8.01806 | 1.66865  |
| Cu | -8.44314 | -3.95061 | 0.65179  | H | -4.22949  | -1.12253 | -0.99266 |
| Cu | -6.07243 | -6.20989 | -0.58254 | H | -3.15739  | -0.66060 | 0.02653  |
| O  | -6.58867 | -7.90903 | -1.53910 | H | -6.15942  | -9.48578 | 1.01661  |
| C  | -1.13699 | -5.32159 | 1.86330  | H | -4.79605  | -9.46735 | 0.32038  |
| B  | -4.96854 | -2.52100 | 3.25264  | H | -7.55362  | -8.00866 | -1.64831 |
| Cu | -4.37780 | -2.61808 | 1.12830  | H | -6.30564  | -8.65901 | -0.91443 |
| O  | -3.53834 | -1.46061 | -0.39125 |   |           |          |          |

**\*C<sub>2</sub>H<sub>4</sub> + \*2OH + \*2H<sub>2</sub>O**

|   |          |         |          |   |         |          |          |
|---|----------|---------|----------|---|---------|----------|----------|
| C | 0.66371  | 5.51045 | -0.89365 | C | 3.02589 | 4.83672  | -0.26298 |
| C | 1.68048  | 4.54145 | -0.63883 | C | 4.59444 | 1.43076  | -0.15664 |
| C | 1.32861  | 3.18069 | -0.79328 | C | 4.29410 | 0.08103  | -0.41691 |
| C | 0.04816  | 2.73655 | -1.21704 | C | 5.31426 | -0.93078 | -0.40032 |
| C | -0.95752 | 3.73792 | -1.47070 | C | 5.05885 | -2.24935 | -0.71881 |
| C | -0.59730 | 5.11883 | -1.28769 | C | 3.75023 | -2.67759 | -1.08341 |
| C | 2.24652  | 2.11262 | -0.57284 | C | 2.72927 | -1.68935 | -1.10941 |
| C | 3.62003  | 2.44120 | -0.24877 | C | 2.95646 | -0.32390 | -0.76843 |
| C | 3.95069  | 3.83044 | -0.07991 | C | 3.36990 | -4.00851 | -1.41826 |

|    |          |          |          |   |          |          |          |
|----|----------|----------|----------|---|----------|----------|----------|
| C  | 2.06132  | -4.31280 | -1.73479 | O | -1.89100 | 2.00076  | 2.10879  |
| C  | 1.01709  | -3.32520 | -1.75645 | O | -2.85912 | -2.25265 | 0.69435  |
| C  | 1.37350  | -1.96446 | -1.45238 | H | -2.98688 | 4.15491  | -2.09689 |
| C  | -0.30865 | -3.66872 | -2.08080 | H | 5.62293  | 1.70665  | 0.09212  |
| C  | -1.33140 | -2.70637 | -2.11924 | H | 4.98172  | 4.07870  | 0.18513  |
| C  | -1.06328 | -1.32472 | -1.79170 | H | 0.89929  | 6.57162  | -0.77775 |
| C  | -2.09429 | -0.37314 | -2.00688 | H | -1.36464 | 5.87321  | -1.48281 |
| C  | -3.39447 | -0.72026 | -2.43156 | H | 3.32020  | 5.88130  | -0.13163 |
| C  | -3.66863 | -2.10634 | -2.64359 | H | 6.32897  | -0.62510 | -0.13186 |
| C  | -2.67543 | -3.05358 | -2.50221 | H | 5.86789  | -2.98405 | -0.69249 |
| C  | -4.32045 | 0.34383  | -2.65185 | H | 4.12962  | -4.79447 | -1.41496 |
| C  | -3.94026 | 1.65571  | -2.46817 | H | 1.79054  | -5.34313 | -1.98116 |
| C  | -2.61826 | 2.02400  | -2.03943 | H | -0.54562 | -4.70916 | -2.32055 |
| C  | -1.66925 | 0.96423  | -1.78278 | H | -2.89245 | -4.10545 | -2.70634 |
| B  | -0.17349 | 1.20849  | -1.42467 | H | -4.67392 | -2.40745 | -2.94967 |
| B  | 0.34486  | -0.79245 | -1.40330 | H | -5.33647 | 0.10575  | -2.97743 |
| Cu | -1.02733 | -1.28811 | 0.45207  | H | -4.65641 | 2.46069  | -2.65494 |
| Cu | -3.09536 | 0.44331  | 2.22363  | H | 1.50480  | 1.42984  | 3.71530  |
| C  | -4.61605 | 0.92866  | 0.94868  | H | -1.16889 | 2.04169  | 2.77161  |
| C  | -5.02581 | -0.10248 | 1.77529  | H | -2.84696 | -2.85270 | 1.46366  |
| Cu | -1.09253 | 1.35195  | 0.45393  | H | -3.04285 | -2.81390 | -0.08842 |
| Cu | 0.03501  | -0.12332 | 2.38556  | H | -5.61169 | 0.10393  | 2.67721  |
| Cu | 0.32960  | -2.48270 | 2.20897  | H | -4.24211 | 0.72668  | -0.05943 |
| Cu | 1.36284  | -0.98322 | 0.58031  | H | -4.87532 | 1.96810  | 1.17274  |
| B  | 1.74275  | 0.66168  | -0.84549 | H | -4.98098 | -1.14141 | 1.43933  |
| Cu | 1.46283  | 1.51843  | 1.21871  | O | -2.67223 | -1.02555 | 3.65027  |
| O  | 0.80412  | 1.59068  | 3.05617  | H | -3.37062 | -1.70470 | 3.55820  |
| C  | -2.25000 | 3.37310  | -1.89191 | H | -1.84637 | -1.49324 | 3.37377  |

**\*C<sub>2</sub>H<sub>4</sub> + \*OH + \*3H<sub>2</sub>O**

|   |         |          |          |   |         |          |          |
|---|---------|----------|----------|---|---------|----------|----------|
| C | 0.95760 | -2.00006 | -1.31615 | C | 2.49673 | -3.92110 | -1.45927 |
| C | 2.05251 | -1.17967 | -1.71227 | C | 1.16218 | -3.43196 | -1.23707 |
| C | 3.34359 | -1.68304 | -1.95933 | C | 1.68265 | 0.18496  | -1.92909 |
| C | 3.54135 | -3.09025 | -1.80048 | C | 2.70228 | 1.09018  | -2.42138 |

|    |          |          |          |    |          |          |          |
|----|----------|----------|----------|----|----------|----------|----------|
| C  | 4.03848  | 0.57494  | -2.58542 | Cu | 0.25226  | 0.36433  | 2.20748  |
| C  | 4.34721  | -0.75011 | -2.36926 | Cu | 0.71222  | 2.75049  | 1.84946  |
| C  | 2.38444  | 2.42293  | -2.72773 | Cu | 1.03911  | 1.26850  | 0.01183  |
| C  | 1.10360  | 2.94419  | -2.47591 | B  | 0.18738  | 0.56493  | -1.77542 |
| C  | 0.05003  | 2.10001  | -1.95861 | C  | 5.31669  | -1.99681 | 0.92276  |
| C  | -1.19295 | 2.71856  | -1.62827 | C  | 4.35745  | -2.80742 | 1.51587  |
| C  | -1.46801 | 4.08272  | -1.85390 | H  | 0.25949  | -5.36945 | -0.93248 |
| C  | -0.41614 | 4.88583  | -2.39277 | H  | -5.54113 | 1.77533  | -0.37386 |
| C  | 0.81448  | 4.34029  | -2.67958 | H  | -6.40527 | -0.51284 | -0.11035 |
| C  | -2.78040 | 4.54747  | -1.53184 | H  | -4.43748 | -4.98353 | -0.26382 |
| C  | -3.74717 | 3.68539  | -1.06362 | H  | -2.12067 | -5.77969 | -0.56260 |
| C  | -3.50055 | 2.28030  | -0.87008 | H  | -6.08140 | -2.95769 | -0.08588 |
| C  | -2.14993 | 1.81023  | -1.09277 | H  | -4.75490 | 4.05855  | -0.86101 |
| C  | -4.53536 | 1.38334  | -0.55086 | H  | -3.01724 | 5.60447  | -1.68167 |
| C  | -4.33297 | -0.01084 | -0.54384 | H  | -0.59961 | 5.94891  | -2.57092 |
| C  | -5.41318 | -0.93050 | -0.30352 | H  | 1.61135  | 4.97117  | -3.08225 |
| C  | -5.23486 | -2.29785 | -0.29507 | H  | 3.16662  | 3.08578  | -3.10769 |
| C  | -3.95405 | -2.87741 | -0.54152 | H  | 4.81261  | 1.26826  | -2.92430 |
| C  | -2.88553 | -1.98561 | -0.81844 | H  | 5.36808  | -1.10837 | -2.52625 |
| C  | -3.03218 | -0.57039 | -0.80503 | H  | 4.54007  | -3.50429 | -1.96205 |
| C  | -1.53702 | -2.40782 | -0.97021 | H  | 2.66582  | -4.99749 | -1.36858 |
| C  | -1.24137 | -3.81333 | -0.87061 | H  | -3.15794 | -2.69459 | 1.70274  |
| C  | -2.34104 | -4.71107 | -0.63237 | H  | 1.79765  | -1.66405 | 2.96658  |
| C  | -3.63581 | -4.26812 | -0.46739 | H  | 3.18203  | 1.62441  | 1.18060  |
| Cu | -1.53345 | -0.89299 | 0.87584  | H  | 3.98877  | 1.16005  | -0.08194 |
| O  | -2.65312 | -2.04685 | 2.24305  | H  | 6.13367  | -1.57203 | 1.51533  |
| B  | -0.44131 | -1.31740 | -1.14907 | H  | 3.70131  | -3.43008 | 0.89716  |
| Cu | 0.89633  | -1.35467 | 0.62703  | H  | 4.40247  | -3.04094 | 2.58468  |
| O  | 1.89346  | -0.90955 | 2.35352  | H  | 5.43411  | -1.97525 | -0.16436 |
| Cu | 3.64481  | -0.93390 | 1.37362  | H  | -2.05309 | -2.58996 | 2.78892  |
| O  | 3.91215  | 1.02296  | 0.88776  | O  | 2.95911  | 1.10881  | 4.10978  |
| C  | 0.07798  | -4.29303 | -1.00105 | H  | 2.58054  | 0.39033  | 3.55065  |
| B  | -1.75629 | 0.29822  | -1.00899 | H  | 3.03384  | 1.85444  | 3.48543  |
| Cu | -1.26232 | 1.55071  | 0.81325  |    |          |          |          |

**\*CH<sub>3</sub>CH<sub>2</sub> + \*OH + \*3H<sub>2</sub>O**

|   |          |          |         |    |          |          |          |
|---|----------|----------|---------|----|----------|----------|----------|
| C | 2.87937  | -4.71129 | 0.83129 | Cu | -1.33481 | -1.26097 | -0.41393 |
| C | 3.39792  | -3.38536 | 0.80583 | C  | -2.63730 | -1.74358 | -1.98782 |
| C | 2.47508  | -2.32475 | 1.01475 | C  | -4.02997 | -2.29815 | -1.65560 |
| C | 1.08287  | -2.52934 | 1.21006 | C  | -0.78195 | -4.14164 | 1.42755  |
| C | 0.58616  | -3.87750 | 1.22292 | B  | -0.15728 | 0.74226  | 1.83233  |
| C | 1.53295  | -4.94228 | 1.03120 | Cu | -1.09694 | 1.19555  | -0.03357 |
| C | 2.83428  | -0.95369 | 0.94459 | Cu | -0.48768 | 2.64447  | -1.89271 |
| C | 4.20393  | -0.61899 | 0.66830 | Cu | -0.37869 | 0.24853  | -2.21876 |
| C | 5.13379  | -1.70046 | 0.48985 | Cu | 1.22511  | 1.36214  | -0.70787 |
| C | 4.75242  | -3.02593 | 0.55354 | B  | 1.69902  | 0.10221  | 1.11834  |
| C | 4.62004  | 0.72502  | 0.58852 | Cu | 1.18138  | -1.15982 | -0.62340 |
| C | 3.72642  | 1.79081  | 0.79133 | O  | 1.74997  | -2.08858 | -2.33509 |
| C | 4.17030  | 3.15758  | 0.80074 | O  | 0.17042  | -0.79097 | -3.78418 |
| C | 3.33087  | 4.20560  | 1.11528 | Cu | -2.89536 | 0.24850  | -1.53056 |
| C | 1.96621  | 3.97421  | 1.46063 | O  | -3.93815 | 1.77010  | -0.55169 |
| C | 1.50191  | 2.63660  | 1.42714 | H  | -1.13023 | -5.17828 | 1.42988  |
| C | 2.32715  | 1.53779  | 1.05617 | H  | 5.67147  | 0.94368  | 0.38204  |
| C | 1.03855  | 4.97756  | 1.87084 | H  | 6.17759  | -1.44687 | 0.28613  |
| C | -0.25134 | 4.64513  | 2.22727 | H  | 3.56227  | -5.55119 | 0.67889  |
| C | -0.73080 | 3.28955  | 2.21865 | H  | 1.15440  | -5.96804 | 1.04085  |
| C | 0.18841  | 2.25014  | 1.82385 | H  | 5.49162  | -3.81613 | 0.39712  |
| C | -2.06344 | 2.98160  | 2.55484 | H  | 5.22095  | 3.35161  | 0.56905  |
| C | -2.55167 | 1.66723  | 2.46208 | H  | 3.71195  | 5.23003  | 1.12205  |
| C | -1.67879 | 0.57608  | 2.08172 | H  | 1.36583  | 6.02004  | 1.90383  |
| C | -2.23982 | -0.73387 | 2.00769 | H  | -0.94936 | 5.42849  | 2.53490  |
| C | -3.59460 | -1.02330 | 2.28309 | H  | -2.74438 | 3.78532  | 2.84726  |
| C | -4.44009 | 0.07580  | 2.62251 | H  | -4.60152 | 2.18205  | 2.98768  |
| C | -3.93783 | 1.35852  | 2.71080 | H  | -5.49754 | -0.11089 | 2.82689  |
| C | -4.00250 | -2.38909 | 2.21452 | H  | -5.04813 | -2.63978 | 2.41055  |
| C | -3.09583 | -3.38422 | 1.92023 | H  | -3.42103 | -4.42753 | 1.89454  |
| C | -1.71049 | -3.10812 | 1.64948 | H  | 1.48508  | -3.02664 | -2.29986 |
| C | -1.29168 | -1.72369 | 1.64117 | H  | -0.57016 | -1.38487 | -4.00821 |
| B | 0.17470  | -1.26565 | 1.35115 | H  | -3.53298 | 2.65377  | -0.65857 |

|   |          |          |          |   |          |          |          |
|---|----------|----------|----------|---|----------|----------|----------|
| H | -3.97219 | 1.62704  | 0.42165  | H | 1.08683  | -1.61544 | -3.04288 |
| H | -4.83186 | -1.58929 | -1.91942 | H | -4.21611 | -3.22527 | -2.22803 |
| H | -1.87145 | -2.54026 | -1.79940 | O | -4.12895 | 0.75624  | -3.26437 |
| H | -2.51704 | -1.54463 | -3.06550 | H | -4.36812 | -0.07092 | -3.72410 |
| H | -4.12980 | -2.53654 | -0.58657 | H | -4.97778 | 1.10271  | -2.92884 |

**\*H + \*OH + \*3H<sub>2</sub>O**

|   |          |          |         |    |          |          |          |
|---|----------|----------|---------|----|----------|----------|----------|
| C | 0.11634  | -2.52601 | 1.37111 | C  | 5.07084  | 1.71108  | 0.95339  |
| C | -1.27000 | -2.41321 | 1.66988 | C  | 2.47025  | -1.57525 | 1.18355  |
| C | -2.12339 | -3.53177 | 1.84804 | C  | 2.96592  | -2.92284 | 1.15876  |
| C | -1.53899 | -4.82526 | 1.72666 | C  | 4.39016  | -3.11359 | 1.10956  |
| C | -0.18850 | -4.97013 | 1.48356 | C  | 5.28100  | -2.05926 | 1.07481  |
| C | 0.69570  | -3.84772 | 1.32878 | Cu | 1.83548  | -0.44035 | -0.64899 |
| C | -3.49529 | -3.26362 | 2.13478 | O  | 2.70800  | -0.72688 | -2.42815 |
| C | -3.96245 | -1.96553 | 2.21828 | B  | 0.95333  | -1.20464 | 1.23180  |
| C | -3.10479 | -0.82350 | 2.04297 | Cu | -0.42289 | -1.53797 | -0.43127 |
| C | -1.71022 | -1.06661 | 1.78215 | Cu | -2.65420 | -1.29703 | -1.45419 |
| C | -3.60898 | 0.49083  | 2.11247 | O  | -4.36631 | -0.20407 | -1.15693 |
| C | -2.77981 | 1.60873  | 1.89033 | C  | 2.08423  | -4.01997 | 1.20917  |
| C | -3.29074 | 2.95172  | 1.95686 | B  | 1.24736  | 0.83288  | 1.11626  |
| C | -2.48746 | 4.05820  | 1.78493 | Cu | 0.51454  | 1.63388  | -0.87979 |
| C | -1.09367 | 3.92484  | 1.50590 | Cu | -0.51016 | -0.11750 | -2.41719 |
| C | -0.57417 | 2.61432  | 1.40211 | O  | 0.70704  | -0.50565 | -3.90744 |
| C | -1.36743 | 1.44099  | 1.60358 | B  | -0.66003 | 0.05866  | 1.57847  |
| C | 0.78961  | 2.33143  | 1.12640 | Cu | -1.62022 | 0.69094  | -0.35873 |
| C | 1.71233  | 3.44368  | 1.04516 | Cu | -1.40230 | 2.15845  | -2.28127 |
| C | 1.16355  | 4.77050  | 1.12235 | H  | -1.17071 | -1.77711 | -1.94493 |
| C | -0.17781 | 5.00614  | 1.33828 | H  | 2.49411  | -5.03372 | 1.19144  |
| C | 3.09939  | 3.22288  | 0.95822 | H  | 3.77022  | 4.08414  | 0.89425  |
| C | 3.64996  | 1.92555  | 0.99203 | H  | 5.71638  | 2.59112  | 0.88708  |
| C | 2.80524  | 0.76924  | 1.09578 | H  | 6.35641  | -2.25091 | 1.03493  |
| C | 3.41232  | -0.51110 | 1.14057 | H  | 4.76434  | -4.14075 | 1.10033  |
| C | 4.81832  | -0.71284 | 1.07697 | H  | 6.72138  | 0.33622  | 0.95548  |
| C | 5.63506  | 0.45112  | 0.99485 | H  | 1.85501  | 5.61239  | 1.03185  |



|   |          |          |         |   |          |          |          |
|---|----------|----------|---------|---|----------|----------|----------|
| H | -0.55141 | 6.03149  | 1.39991 | H | 3.05169  | -1.63774 | -2.48411 |
| H | -2.91657 | 5.06075  | 1.86013 | H | 0.49364  | -1.39867 | -4.23323 |
| H | -4.35521 | 3.07958  | 2.17021 | H | -4.25633 | 0.73455  | -1.41264 |
| H | -4.66994 | 0.64709  | 2.32635 | H | -4.59663 | -0.17552 | -0.20282 |
| H | -5.01901 | -1.78229 | 2.43086 | H | 1.86938  | -0.67941 | -3.12677 |
| H | -4.18037 | -4.10234 | 2.28362 | O | -3.74714 | -3.10425 | -1.03165 |
| H | -2.17288 | -5.70790 | 1.84396 | H | -3.10618 | -3.84122 | -1.01535 |
| H | 0.24750  | -5.97094 | 1.42321 | H | -4.02613 | -3.02809 | -0.09108 |

**\*4H<sub>2</sub>O (ethylene pathway)**

|   |          |          |         |    |          |          |          |
|---|----------|----------|---------|----|----------|----------|----------|
| C | -0.02394 | -2.15564 | 1.71354 | C  | 3.39002  | -0.46483 | 1.08182  |
| C | -1.41226 | -1.89877 | 1.88364 | C  | 4.75641  | -0.80033 | 0.88483  |
| C | -2.36387 | -2.90880 | 2.12331 | C  | 5.65146  | 0.26285  | 0.57276  |
| C | -1.88852 | -4.25317 | 2.20225 | C  | 5.19790  | 1.56134  | 0.46073  |
| C | -0.54892 | -4.54267 | 2.05139 | C  | 2.37914  | -1.42564 | 1.36085  |
| C | 0.43678  | -3.52302 | 1.80875 | C  | 2.75901  | -2.81064 | 1.43789  |
| C | -3.72933 | -2.50291 | 2.26906 | C  | 4.14782  | -3.13466 | 1.24930  |
| C | -4.08391 | -1.17145 | 2.23274 | C  | 5.10595  | -2.17860 | 0.98359  |
| C | -3.11554 | -0.11595 | 2.06174 | Cu | 1.73020  | -0.24617 | -0.63675 |
| C | -1.73799 | -0.50459 | 1.81878 | O  | 2.88353  | -1.22689 | -2.04727 |
| C | -3.46893 | 1.24087  | 2.16970 | B  | 0.91183  | -0.94052 | 1.46337  |
| C | -2.51662 | 2.26487  | 1.99544 | Cu | -0.21097 | -1.87842 | -0.34682 |
| C | -2.89898 | 3.65063  | 2.04058 | Cu | -2.09458 | -1.87206 | -1.91361 |
| C | -2.01140 | 4.67451  | 1.78496 | O  | -4.03204 | -2.43014 | -1.14006 |
| C | -0.65049 | 4.39689  | 1.45712 | C  | 1.80465  | -3.82047 | 1.67231  |
| C | -0.25613 | 3.03438  | 1.43102 | B  | 1.34629  | 1.07121  | 1.07908  |
| C | -1.13904 | 1.95539  | 1.71958 | Cu | -0.01330 | 1.64527  | -0.53156 |
| C | 1.05269  | 2.61165  | 1.07710 | Cu | -0.31634 | -0.21940 | -2.07983 |
| C | 2.04775  | 3.61543  | 0.80467 | Cu | -1.88355 | 1.63403  | -2.06524 |
| C | 1.63562  | 4.99082  | 0.84094 | Cu | -1.85705 | -0.02296 | -0.23884 |
| C | 0.34392  | 5.36930  | 1.14833 | B  | -0.58373 | 0.51313  | 1.63026  |
| C | 3.38540  | 3.25071  | 0.55990 | O  | 1.08573  | -2.80091 | -3.34214 |
| C | 3.81469  | 1.91162  | 0.63394 | H  | 2.13561  | -4.86108 | 1.73398  |
| C | 2.88674  | 0.85206  | 0.92264 | H  | 4.11984  | 4.03242  | 0.34567  |

|   |          |          |         |   |          |          |          |
|---|----------|----------|---------|---|----------|----------|----------|
| H | 5.90282  | 2.36466  | 0.22990 | H | -2.60540 | -5.05793 | 2.38391  |
| H | 6.14827  | -2.47432 | 0.83719 | H | -0.20385 | -5.57770 | 2.12229  |
| H | 4.43845  | -4.18700 | 1.31154 | H | 3.47476  | -1.82874 | -1.55193 |
| H | 6.71001  | 0.03740  | 0.41879 | H | 0.86741  | -2.38149 | -4.19697 |
| H | 2.38662  | 5.75368  | 0.61829 | H | -4.72876 | -1.85991 | -1.51875 |
| H | 0.07197  | 6.42799  | 1.16106 | H | -4.04085 | -2.21697 | -0.18186 |
| H | -2.34746 | 5.71401  | 1.82164 | H | 2.26768  | -1.83199 | -2.56726 |
| H | -3.94208 | 3.88179  | 2.27297 | H | 0.32319  | -2.53907 | -2.75486 |
| H | -4.51172 | 1.50503  | 2.36453 | O | -2.39043 | -2.98349 | -3.71936 |
| H | -5.12855 | -0.88380 | 2.37678 | H | -1.53482 | -2.99942 | -4.19152 |
| H | -4.49506 | -3.26679 | 2.42717 | H | -2.99908 | -2.52551 | -4.33074 |

**\*3H<sub>2</sub>O (ethylene pathway)**

|   |          |          |         |    |          |          |          |
|---|----------|----------|---------|----|----------|----------|----------|
| C | 4.69248  | -2.99758 | 0.60826 | C  | -3.21217 | 1.56449  | 2.39102  |
| C | 4.55159  | -1.57775 | 0.61409 | C  | -3.06985 | 0.18089  | 2.19673  |
| C | 3.25405  | -1.05650 | 0.85573 | C  | -4.16928 | -0.72619 | 2.40081  |
| C | 2.10803  | -1.87541 | 1.05750 | C  | -4.03130 | -2.09408 | 2.29270  |
| C | 2.27737  | -3.30331 | 1.03419 | C  | -2.76724 | -2.68443 | 1.96770  |
| C | 3.60220  | -3.81757 | 0.81305 | C  | -1.69363 | -1.80970 | 1.70649  |
| C | 5.59337  | -0.64038 | 0.35083 | C  | -1.79590 | -0.38333 | 1.79467  |
| C | 5.33430  | 0.71413  | 0.31698 | C  | -2.50147 | -4.08751 | 1.91832  |
| C | 4.01762  | 1.25227  | 0.52489 | C  | -1.23358 | -4.55825 | 1.65533  |
| C | 2.94884  | 0.32728  | 0.78089 | C  | -0.12037 | -3.67964 | 1.41239  |
| C | 3.78195  | 2.64099  | 0.49768 | C  | -0.37765 | -2.25634 | 1.40900  |
| C | 2.50946  | 3.18127  | 0.75989 | B  | 0.72767  | -1.17873 | 1.19665  |
| C | 1.37704  | 2.31734  | 0.99555 | Cu | -0.64591 | -1.77856 | -0.61579 |
| C | 0.15500  | 2.90721  | 1.41308 | Cu | -1.63386 | 0.48425  | -0.23472 |
| C | -0.02997 | 4.30488  | 1.51984 | B  | -0.50618 | 0.45624  | 1.61858  |
| C | 1.08415  | 5.14233  | 1.21230 | C  | 1.18209  | -4.16995 | 1.21304  |
| C | 2.30040  | 4.59968  | 0.85588 | Cu | 0.48124  | 1.70226  | -0.82663 |
| C | -0.85594 | 1.95562  | 1.73623 | Cu | -1.53072 | 2.07889  | -2.11080 |
| C | -2.14643 | 2.45141  | 2.14145 | Cu | -0.40224 | -0.06264 | -2.27860 |
| C | -2.32135 | 3.87579  | 2.24216 | Cu | -2.56237 | -1.09025 | -1.96915 |
| C | -1.31317 | 4.76697  | 1.94477 | O  | -4.37899 | -1.72961 | -0.98769 |

|    |          |          |          |   |          |          |          |
|----|----------|----------|----------|---|----------|----------|----------|
| B  | 1.45660  | 0.75114  | 0.94714  | H | -4.18226 | 1.96437  | 2.69880  |
| Cu | 1.57973  | -0.57431 | -0.82373 | H | -5.13773 | -0.29919 | 2.67444  |
| O  | 2.85563  | -1.39620 | -2.25796 | H | -4.88898 | -2.74604 | 2.47638  |
| H  | 1.34923  | -5.25056 | 1.20261  | H | -3.31966 | -4.78756 | 2.10587  |
| H  | 4.61949  | 3.31878  | 0.31024  | H | -1.04503 | -5.63503 | 1.64208  |
| H  | 6.14718  | 1.41731  | 0.11696  | H | 3.52156  | -1.94580 | -1.79441 |
| H  | 5.67958  | -3.43174 | 0.42921  | H | -5.11612 | -1.12667 | -1.20458 |
| H  | 3.73072  | -4.90326 | 0.79904  | H | -4.26640 | -1.64114 | -0.01648 |
| H  | 6.60616  | -1.01005 | 0.16990  | H | 2.36274  | -2.02102 | -2.82426 |
| H  | 3.15083  | 5.25510  | 0.65000  | O | -3.74428 | -0.69023 | -3.71591 |
| H  | 0.96564  | 6.22702  | 1.27854  | H | -4.62827 | -0.37784 | -3.44091 |
| H  | -1.48572 | 5.84263  | 2.03506  | H | -3.34488 | 0.07741  | -4.16867 |
| H  | -3.29912 | 4.24735  | 2.56070  |   |          |          |          |

**\*2H<sub>2</sub>O (both pathways)**

|   |          |          |         |    |          |          |          |
|---|----------|----------|---------|----|----------|----------|----------|
| C | -0.35088 | -2.25866 | 1.39082 | C  | 2.32375  | 4.59769  | 0.85254  |
| C | -1.67624 | -1.81095 | 1.63872 | C  | 1.10747  | 5.13732  | 1.21187  |
| C | -2.76889 | -2.68458 | 1.81307 | C  | 3.80905  | 2.64058  | 0.49917  |
| C | -2.50442 | -4.08739 | 1.75241 | C  | 4.04773  | 1.25268  | 0.53510  |
| C | -1.22465 | -4.55943 | 1.55447 | C  | 2.97808  | 0.32729  | 0.78642  |
| C | -0.09772 | -3.68249 | 1.37909 | C  | 3.28444  | -1.05520 | 0.87905  |
| C | -4.04670 | -2.09139 | 2.06793 | C  | 4.58621  | -1.57570 | 0.66001  |
| C | -4.17936 | -0.72620 | 2.21293 | C  | 5.62894  | -0.63851 | 0.39962  |
| C | -3.06295 | 0.17701  | 2.10665 | C  | 5.36748  | 0.71511  | 0.34793  |
| C | -1.77376 | -0.38610 | 1.75876 | C  | 2.13924  | -1.87437 | 1.08019  |
| C | -3.20427 | 1.55766  | 2.32617 | C  | 2.30967  | -3.30211 | 1.06638  |
| C | -2.12823 | 2.44296  | 2.11874 | C  | 3.63892  | -3.81544 | 0.87121  |
| C | -2.30092 | 3.86636  | 2.22875 | C  | 4.73046  | -2.99492 | 0.67451  |
| C | -1.28934 | 4.75765  | 1.94397 | Cu | 1.61953  | -0.58418 | -0.82743 |
| C | -0.00590 | 4.29716  | 1.51743 | O  | 2.90868  | -1.39865 | -2.24548 |
| C | 0.17948  | 2.90119  | 1.40356 | B  | 0.75782  | -1.17842 | 1.20359  |
| C | -0.83070 | 1.94747  | 1.72658 | Cu | -0.59062 | -1.76059 | -0.61144 |
| C | 1.39985  | 2.31470  | 0.97938 | Cu | -2.61534 | -1.04090 | -1.73709 |
| C | 2.53372  | 3.17952  | 0.75204 | O  | -4.58007 | -1.40229 | -1.25904 |

|    |          |          |          |   |          |          |          |
|----|----------|----------|----------|---|----------|----------|----------|
| C  | 1.21086  | -4.17032 | 1.21787  | H | 3.17403  | 5.25448  | 0.65077  |
| B  | 1.48669  | 0.75183  | 0.93495  | H | 0.98774  | 6.22149  | 1.28324  |
| Cu | 0.58955  | 1.70579  | -0.90116 | H | -1.46099 | 5.83285  | 2.04045  |
| Cu | -0.43420 | -0.07093 | -2.27284 | H | -3.28107 | 4.23745  | 2.54020  |
| Cu | -1.44442 | 2.13717  | -2.13315 | H | -4.18302 | 1.95870  | 2.60317  |
| Cu | -1.53726 | 0.58899  | -0.22592 | H | -5.15999 | -0.29855 | 2.43807  |
| B  | -0.47477 | 0.44697  | 1.63083  | H | -4.92005 | -2.73947 | 2.17747  |
| H  | 1.37890  | -5.25066 | 1.20326  | H | -3.33440 | -4.78753 | 1.87690  |
| H  | 4.64678  | 3.31967  | 0.31775  | H | -1.04000 | -5.63668 | 1.53250  |
| H  | 6.18166  | 1.41782  | 0.15183  | H | 3.58433  | -1.93520 | -1.78100 |
| H  | 5.72113  | -3.42857 | 0.51551  | H | -5.16961 | -0.65736 | -1.49031 |
| H  | 3.76975  | -4.90087 | 0.86841  | H | -4.62709 | -1.45707 | -0.27741 |
| H  | 6.64484  | -1.00769 | 0.23634  | H | 2.43326  | -2.03247 | -2.81666 |

For \*H<sub>2</sub>O see C<sub>1</sub> pathway.

## 16. References

- i. W. I. Choi, B. C. Wood, E. Schwegler and T. Ogitsu, *Adv. Energy Mater.*, 2015, **5**, 1501423.
- ii. ed. Yves Huttel, *Gas-Phase Synthesis of Nanoparticles*, Wiley-VCH Verlag GmbH & Co.KGaA, Weinheim, 2017.
- iii. J. E. Scheerder, T. Picot, N. Reckinger, T. Sneyder, V. S. Zharinov, J. F. Colomer, E. Janssens and J. van de Vondel, *Nanoscale*, 2017, **9**, 10494-105014.
- iv. J. E. Scheerder, S. Liu, V. S. Zharinov, N. Reckinger, J. F. Colomer, H. P. Cheng, J. van de Vondel and E. Janssens, *Adv. Mater. Interf.*, 2018, **5**, 1801274.
- v. R. Passalacqua, S. Parathoner, G. Centi, A. Halder, E. C. Tyo, B. Yang, S. Seifert and S. Vajda, *Catal. Sci. Technol.*, 2016, **6**, 6977-6985.
- vi. W. M. Haynes, *CRC Handbook of Chemistry and Physics, 97th Edition, 2016-2017*, CRC Press, Boca Raton, 2017.
- vii. J. A. Bumpus, *J. Phys. Chem. A*, 2018, **122**, 6615–6632.
- viii. C. Dou, S. Saito, K. Matsuo, I. Hisaki and S. Yamaguchi, *Angew. Chem. Int. Ed.*, 2012, **51**, 12206-12210.

- ix. Z. A. Piazza, H. S. Hu, W. L. Li, Y. F. Zhao, J. Li and L. S. Wang, *Nat. Commun.*, 2014, **5**, 1-6.
- x. Z. H. Sheng, H. L. Gao, W. J. Bao, F. bin Wang and X. H. Xia, *J. Mater. Chem.*, 2012, **22**, 390-395.
- xi. B. Kiraly, X. Liu, L. Wang, Z. Zhang, A. J. Mannix, B. L. Fisher, B. I. Yakobson, M. C. Hersam and N. P. Guisinger, *ACS Nano*, 2019, **13**, 3816–3822.
- xii. M. G. Cuxart, K. Seufert, V. Chesnyak, W. A. Waqas, A. Robert, M. L. Bocquet, G. S. Duesberg, H. Sachdev and W. Auwärter, *Sci. Adv.*, 2021, **7**, eabk1490.
- xiii. A. Mazaheri, M. Javadi and Y. Abdi, *ACS Appl. Mater. Interfaces*, 2021, **13**, 8844–8850.
- xiv. K. M. Omambac, M. Petrović, P. Bampoulis, C. Brand, M. A. Kriegel, P. Dreher, D. Janoschka, U. Hagemann, N. Hartmann, P. Valerius, T. Michely, F. J. Meyer Zu Heringdorf and M. Horn-Von Hoegen, *ACS Nano*, 2021, **15**, 7421–7429.
- xv. X. Nie, M. R. Esopi, M. J. Janik and A. Asthagiri, *Angew. Chem. Int. Ed.*, 2013, **125**, 2519-2522.
- xvi. A. A. Peterson, F. Abild-Pedersen, F. Studt, J. Rossmeisl and J. K. Nørskov, *Energy Environ. Sci.*, 2008, **1**, 32-65.
- xvii. S. Yang, D. Rao, J. Ye, S. Yang, C. Zhang, C. Gao, X. Zhou, H. Yang and X. Yan, *Int. J. Hydrog. Energy*, 2021, **46**, 3484-3492.
- xviii. J. K. Nørskov, T. Bligaard, A. Logadottir, J. R. Kitchin, J. G. Chen, S. Pandelov and U. Stimming, *J. Electrochem. Soc.*, 2005, **152**, J23.
- xix. R. Sundararaman, K. Letchworth-Weaver, K. A. Schwarz, D. Gunceler, Y. Ozhabes and T. A. Arias, *SoftwareX*, 2017, **6**, 278-284.
- xx. M. D. Hossain, Y. Huang, T. H. Yu, W. A. Goddard and Z. Luo, *Nat. Commun.*, 2020, **11**, 1-14.
- xxi. R. Sundararaman and W. A. Goddard, *J. Chem. Phys.*, 2015, **142**, 064107.
